# Supplementary material for: High-Throughput Sequencing of Small RNAs for Diagnostics of Grapevine Viruses and Viroids in Russia
Source: MDPI journal article supplement (doi:10.3390/v13122432), 2021-12-03

**High-Throughput Sequencing of Small RNAs for Diagnostics of Grapevine Viruses and Viroids in Russia**

**Library Zs85-SV2\_S19**

1606 Novichok {GLRaV-3, GFkV, GVT, GPGV, GRVfV, GRSPaV, GSyV-1, GYSVd-2, AGVd}

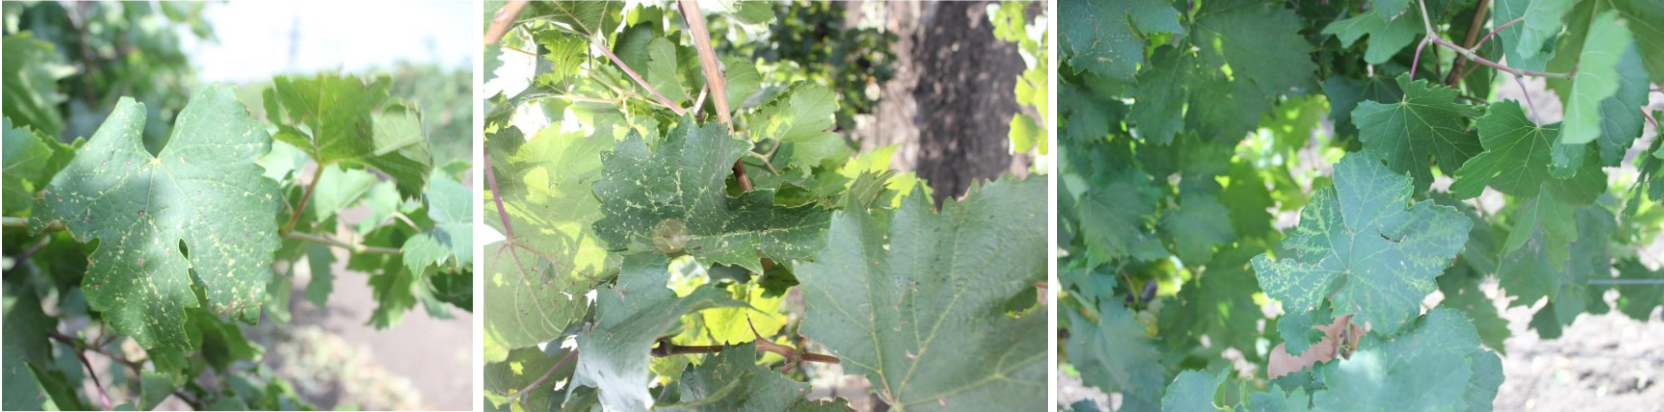

1609 Livia {GLRaV-1, GLRaV-3, GFkV, GVT, GPGV, GRSPaV, GVA, GSyV-1, HSVd}

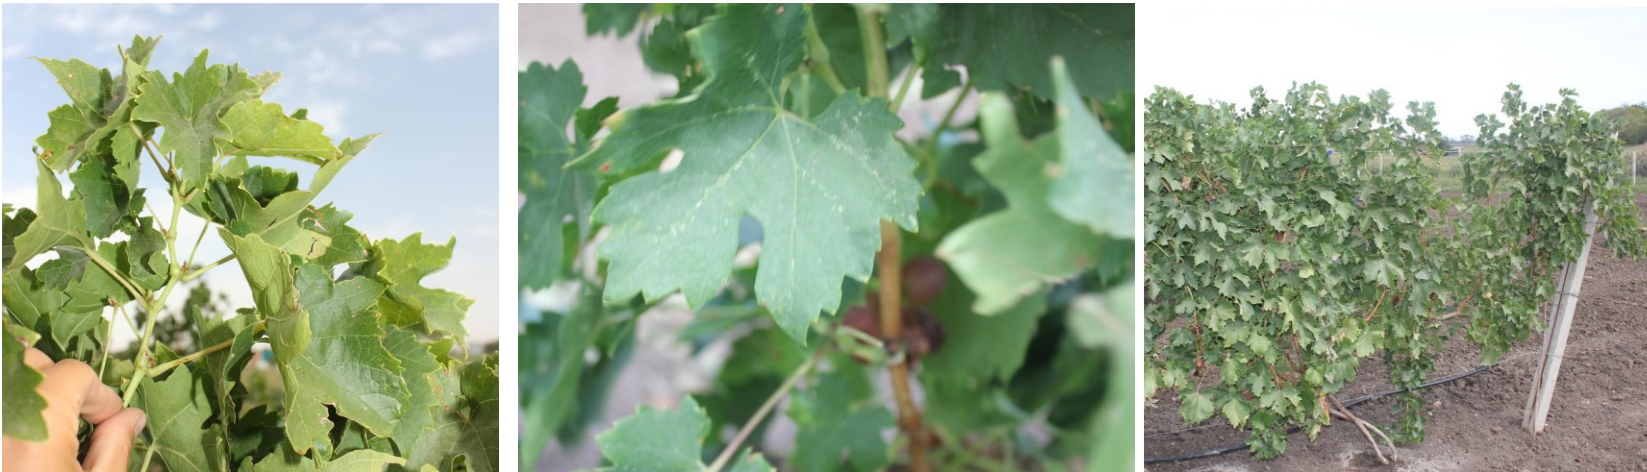



1610 Livia {GLRaV-1, GLRaV-2, GLRaV-3, GFkV, GPGV, GRVfV, GRSPaV, GVA, GSyV-1, HSVd}

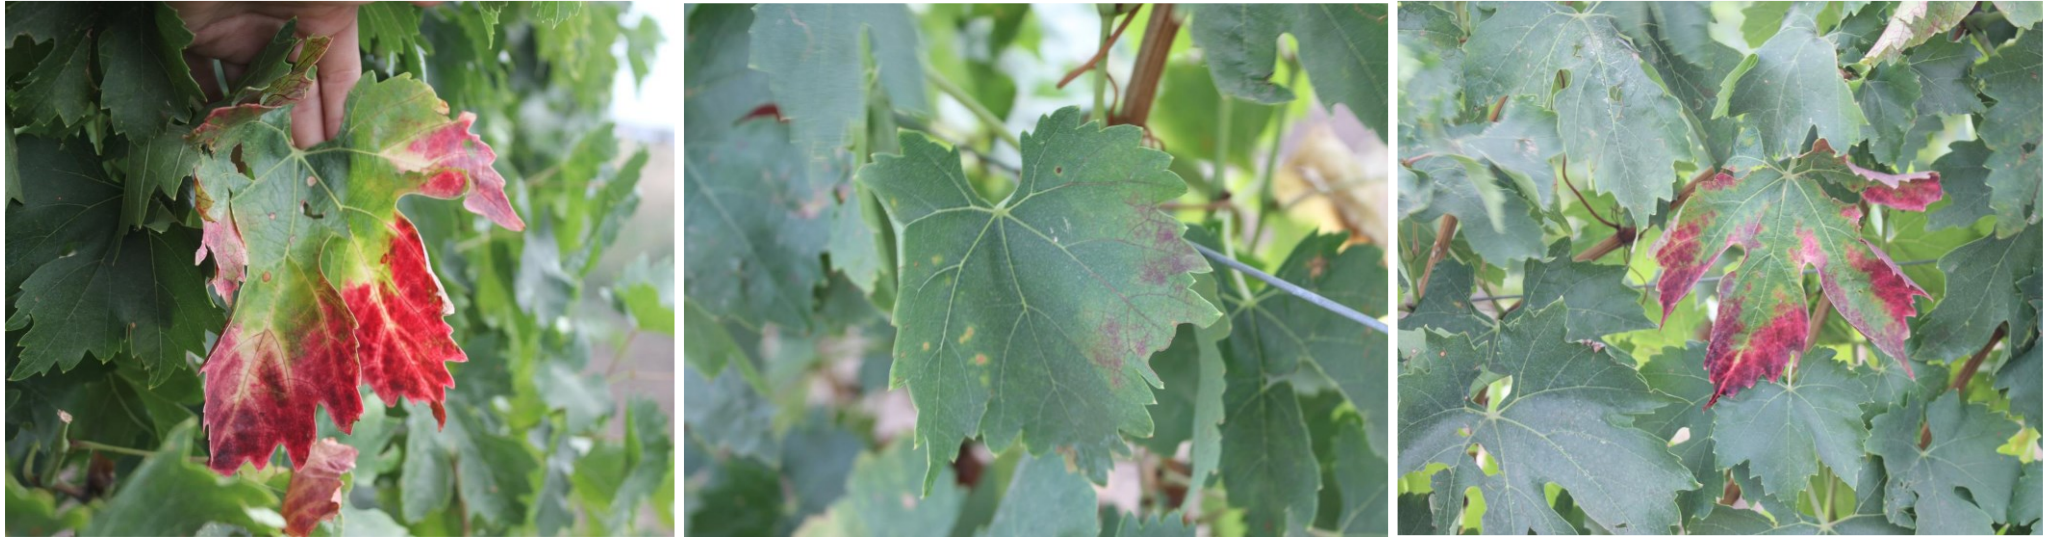

1612 Preobrazhenie {GFkV, GPGV, GRSPaV, GSyV-1, HSVd}

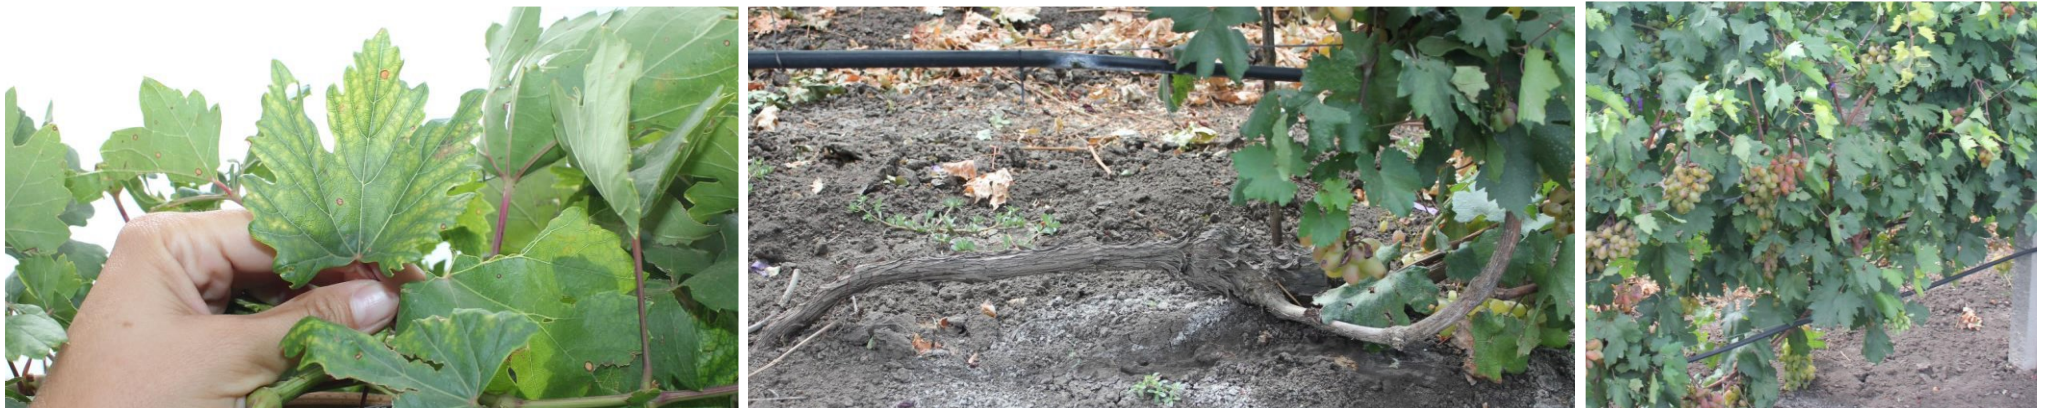



1615 Livia {GLRaV-2, GFkV, GVT, GPGV, GRSPaV, GYSVd-2, AGVd}

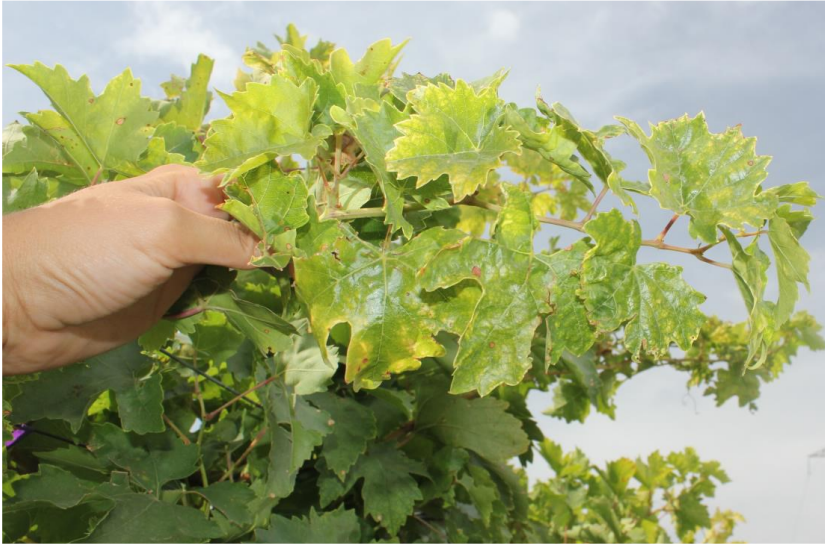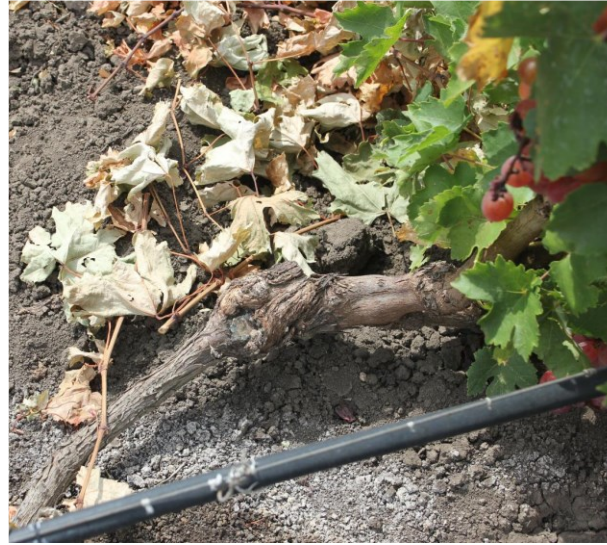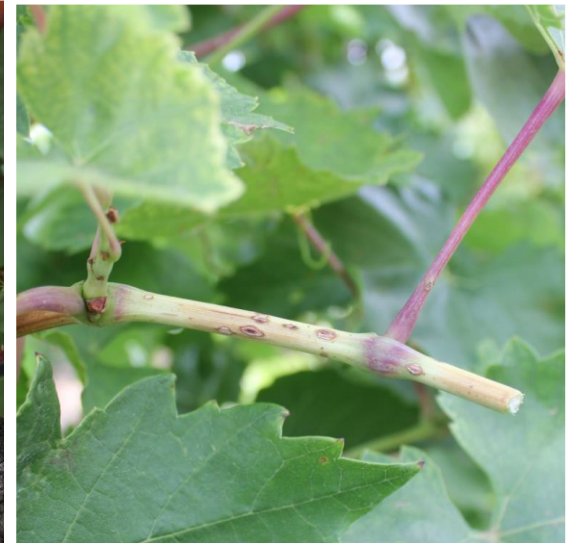

1619 Livia {GLRaV-2, GLRaV-3, GFkV, GPGV, GRSPaV, GSyV-1, GYSVd-1, HSVd}

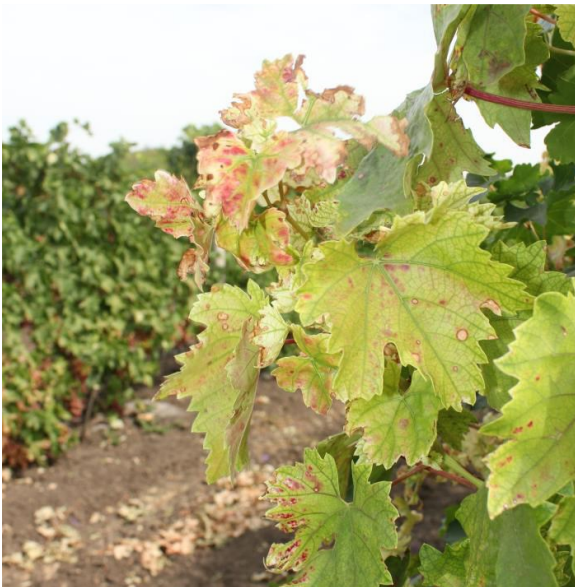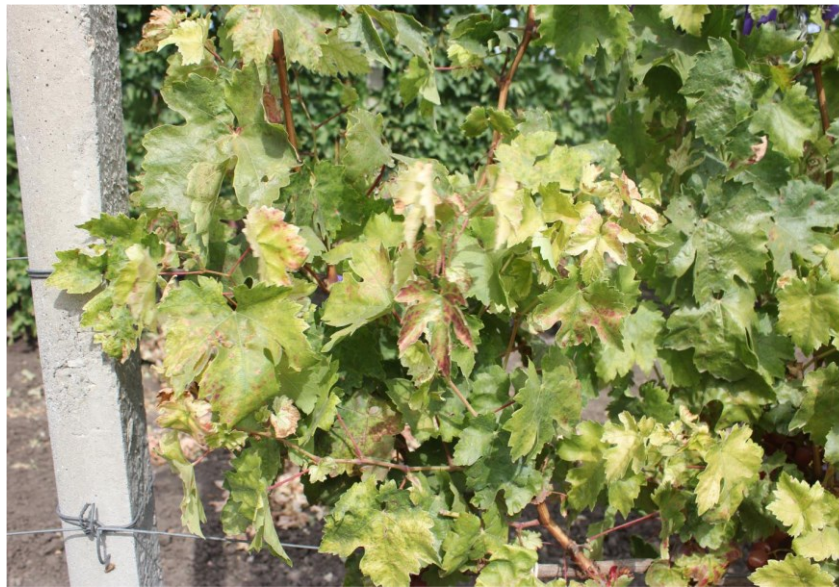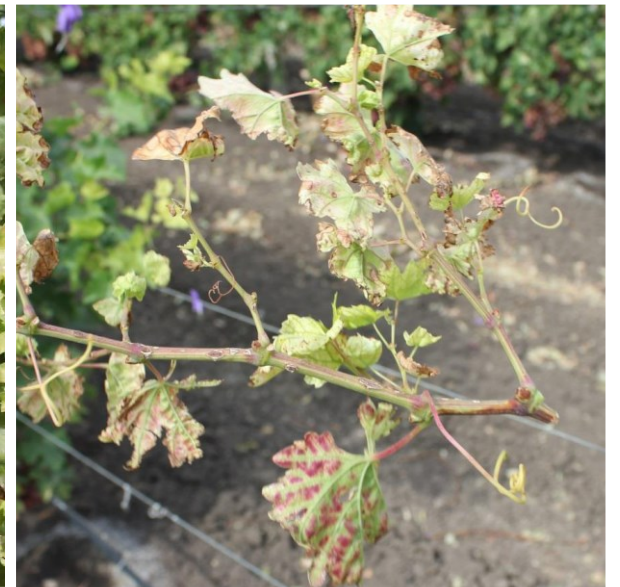



1620 Livia {GLRaV-2, GLRaV-3, GFkV, GPGV, GRVfV, GRSPaV, GSyV-1, GYSVd-1, GYSVd-2, HSVd, AGVd}

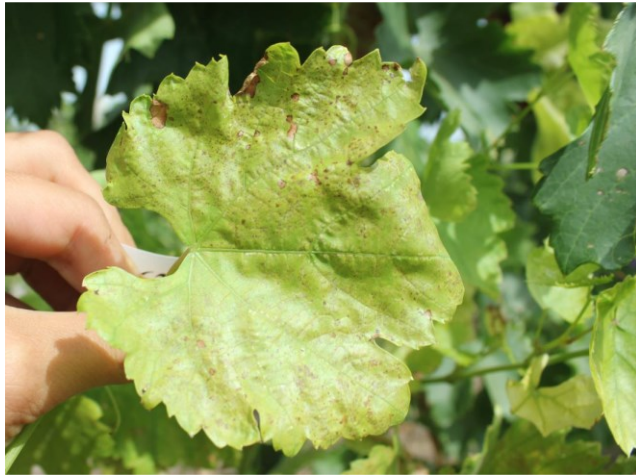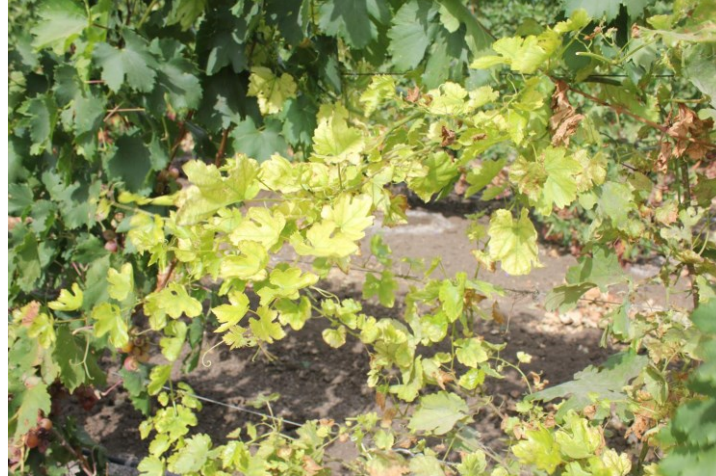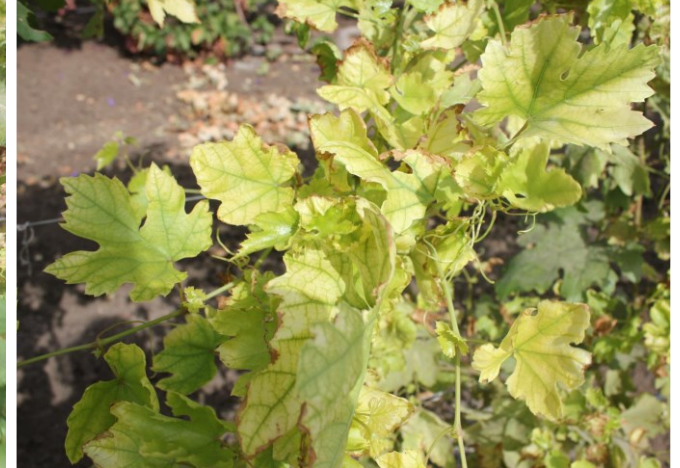



**Library Lib-03\_S20**

263 Krasnostop Zolotovskiy {GLRaV-3, GPGV, GRSPaV, GSyV-1, GYSVd-2, HSVd, AGVd}

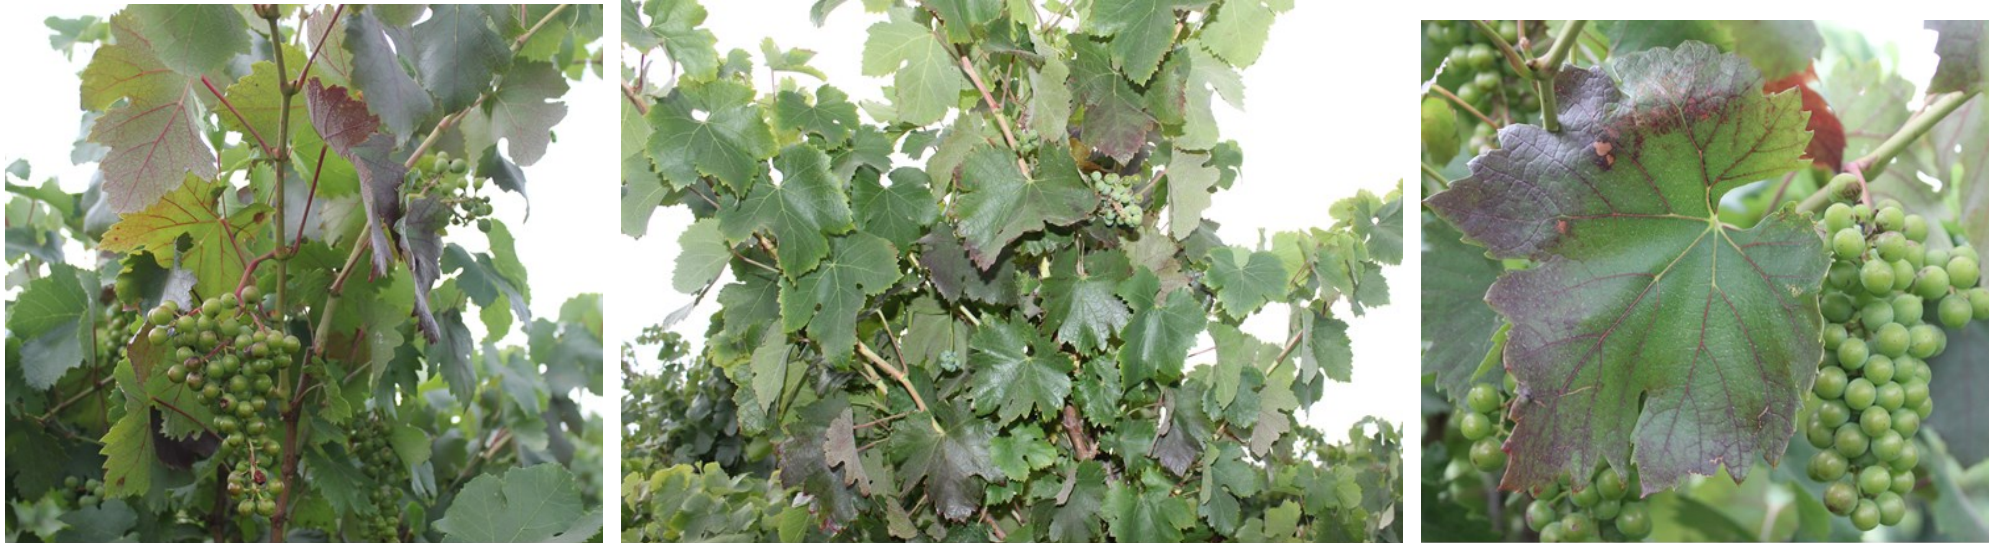

347 Krasnostop Zolotovskiy {GFkV, GVT, GPGV, GRSPaV, GSyV-1, GYSVd-1, AGVd}

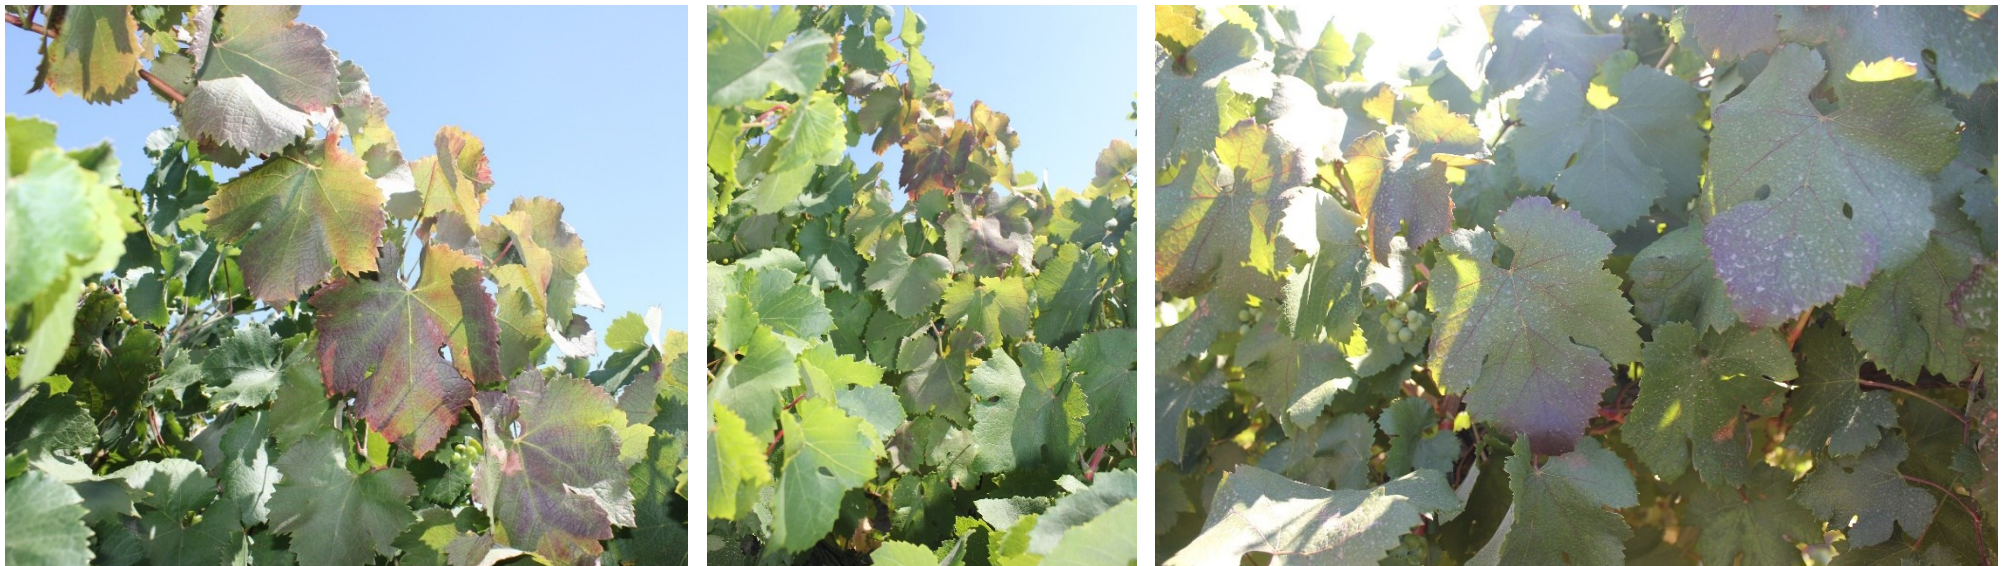



351 Pervenec Magaracha {GFkV, GVT, GPGV, GRSPaV, GYSVd-1, HSVd}

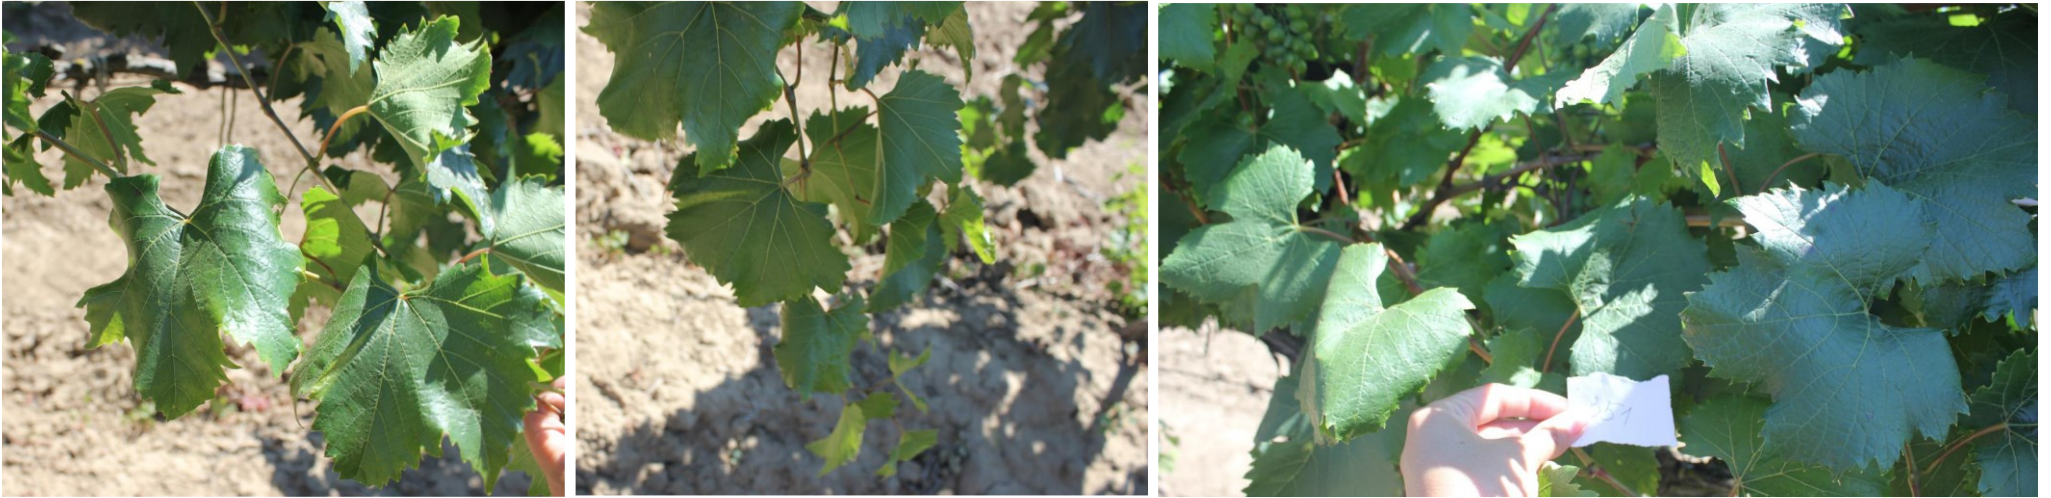

622 Krasnostop Zolotovskiy {GFkV, GVT, GPGV, GRSPaV, GSyV-1, GYSVd-2, HSVd}

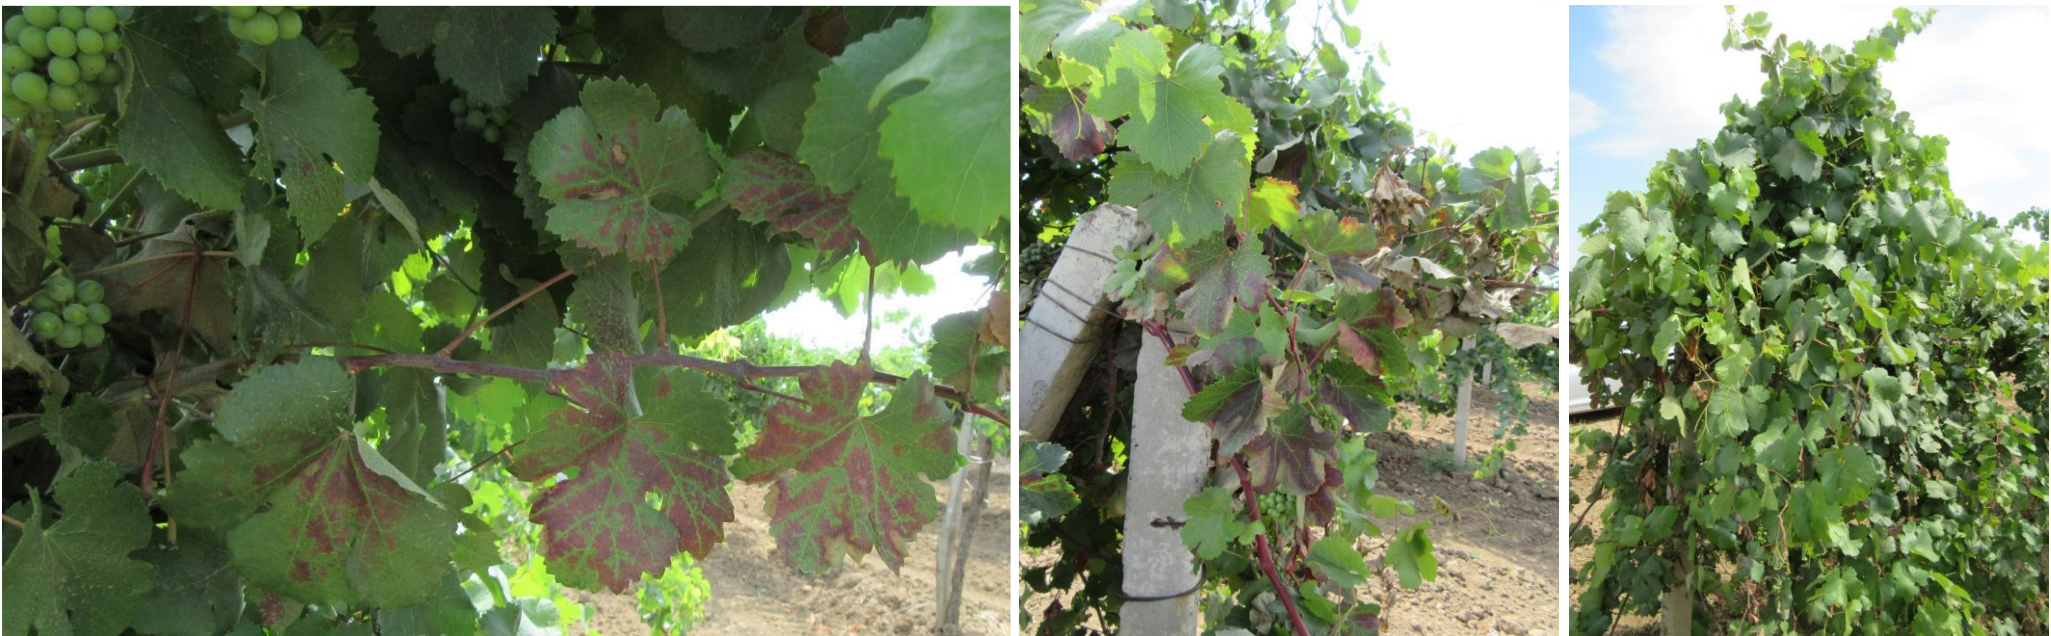



628 Krasnostop Zolotovskiy {GLRaV-3, GFkV, GVT, GPGV, GSyV-1, GYSVd-1, HSVd}

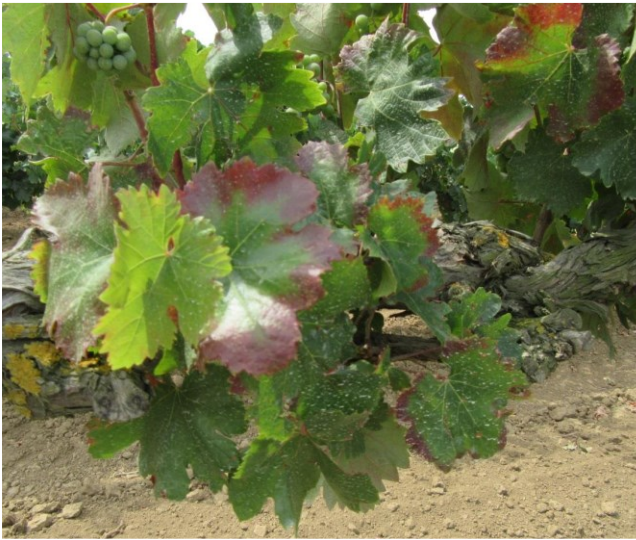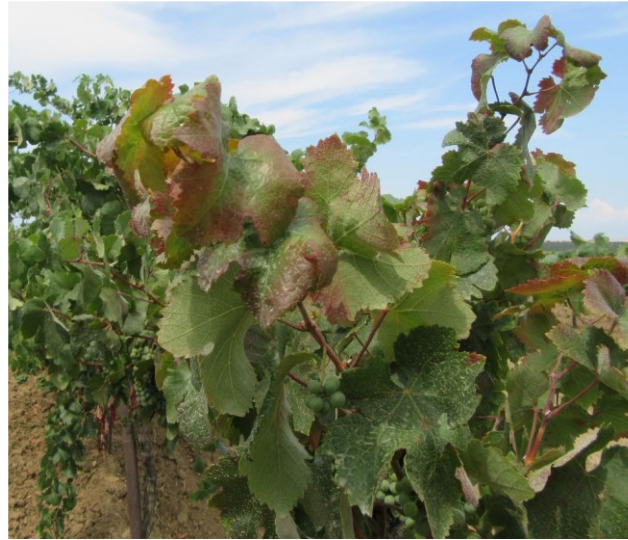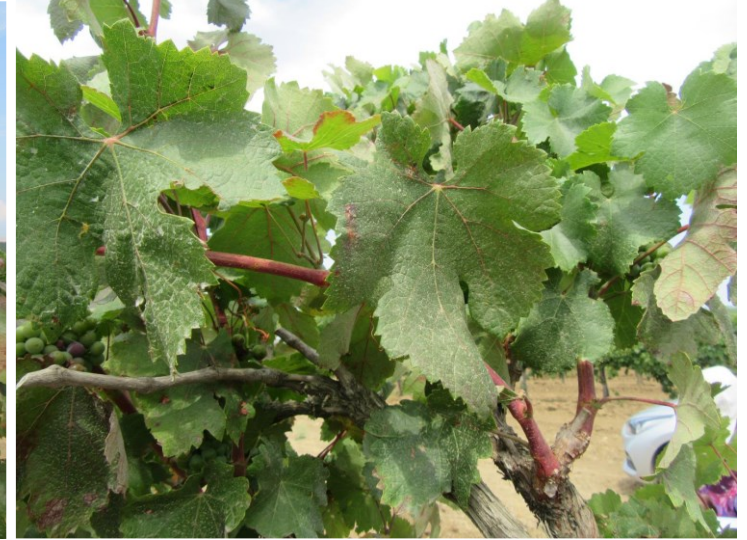

650 Saperavi {GLRaV-4, GFkV, GPGV, GRSPaV, GSyV-1, GYSVd-1, HSVd}

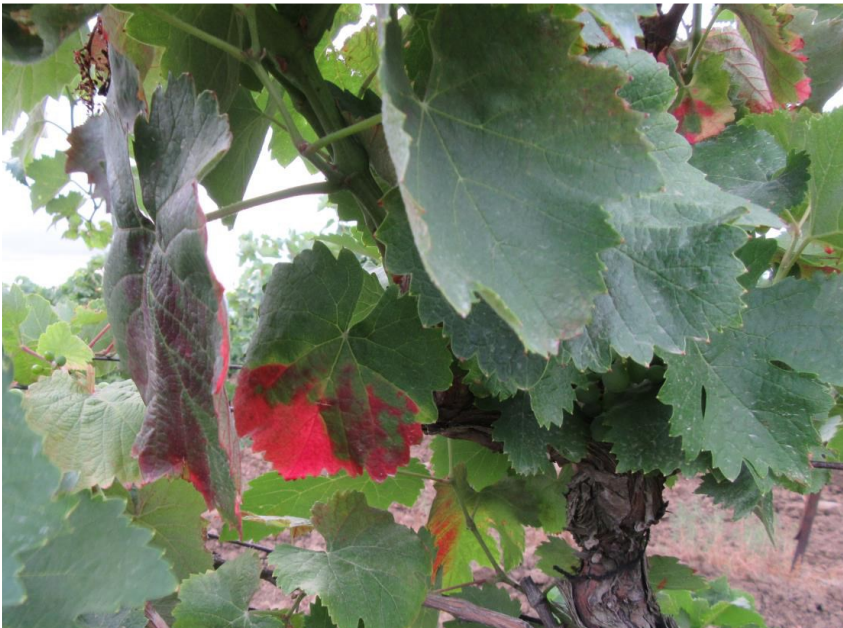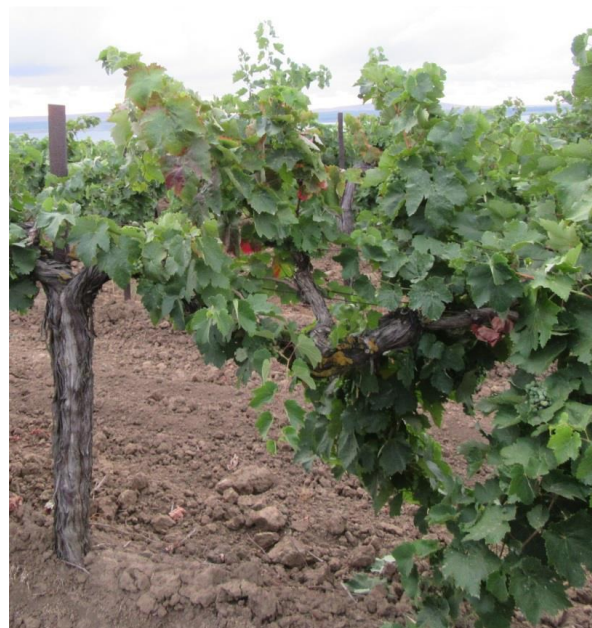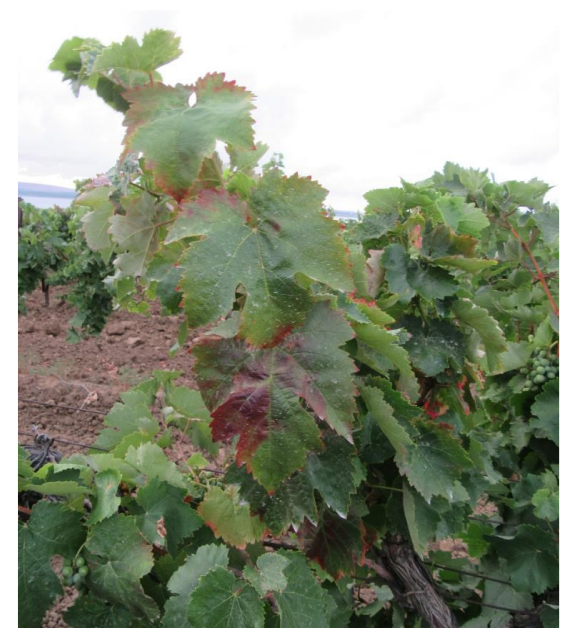



654 Saperavi {GFkV, GVT, GPGV, GRVfV, GRSPaV, GSyV-1, GYSVd-1, HSVd}

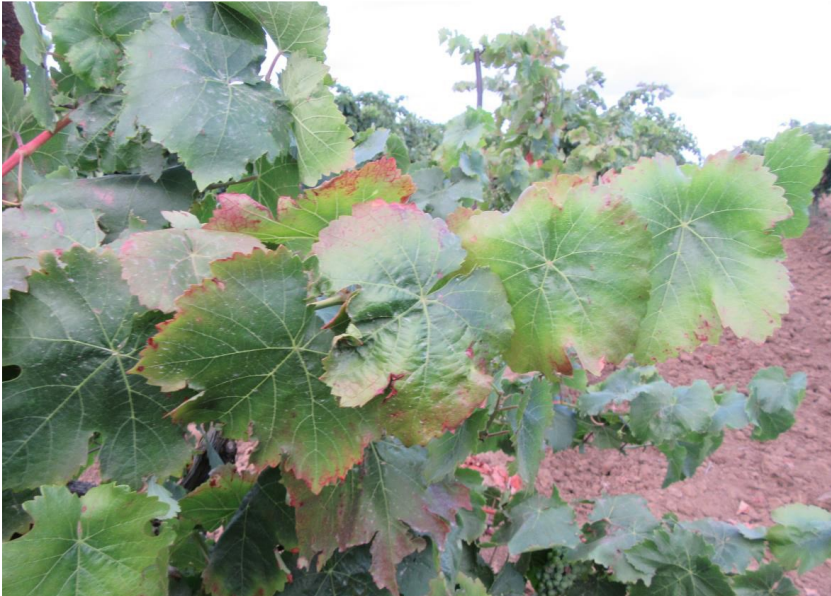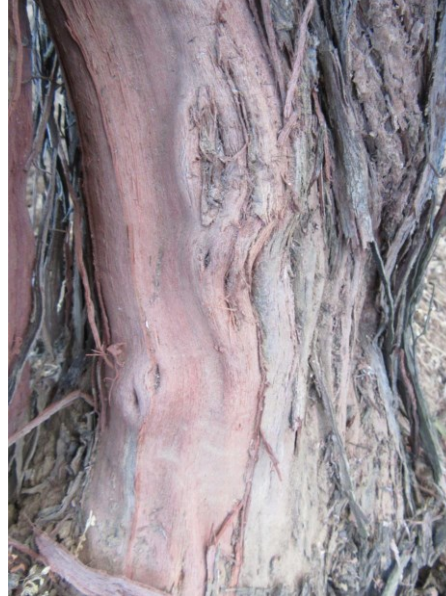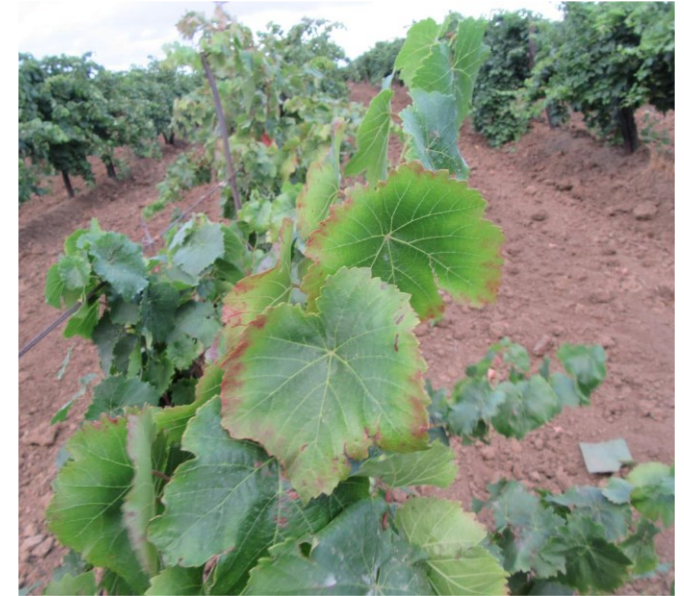

1512 Saperavi {GLRaV-1, GFkV, GVT, GPGV, GRSPaV, GSyV-1, GYSVd-1, HSVd}

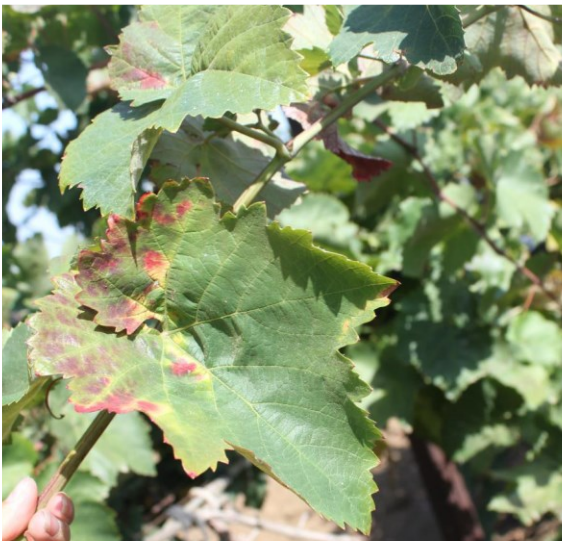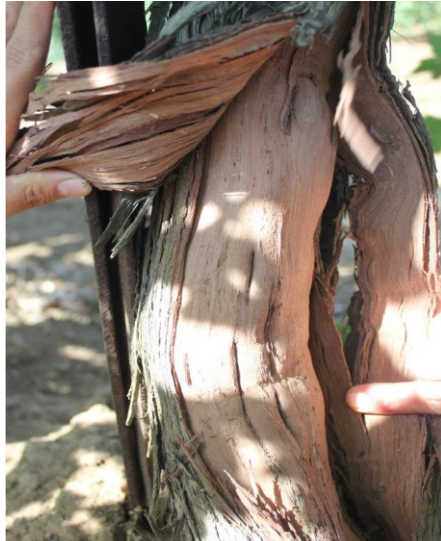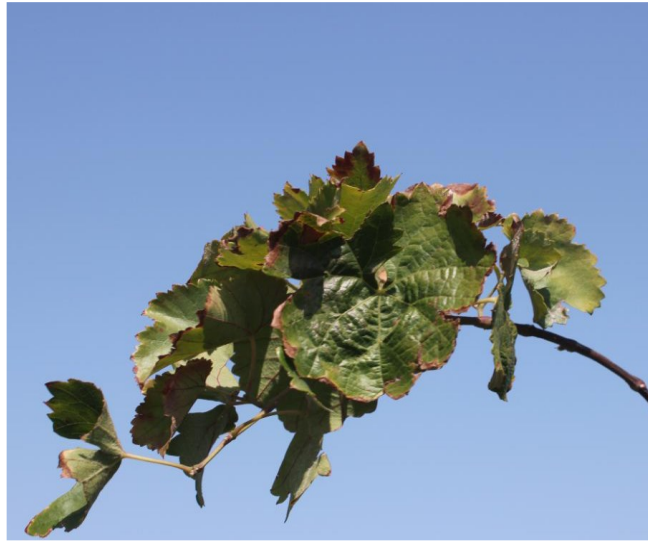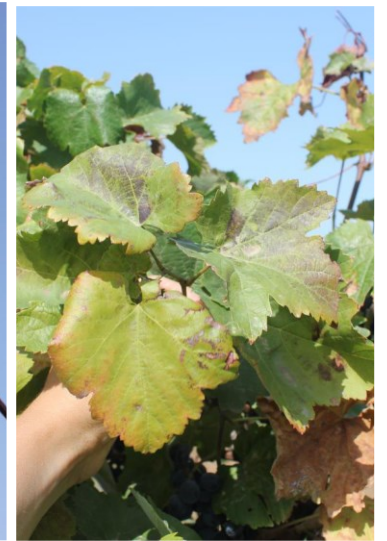



1515 Saperavi {GLRaV-4, GFkV, GVT, GPGV, GRVfV, GRSPaV, GSyV-1, GYSVd-1, HSVd}

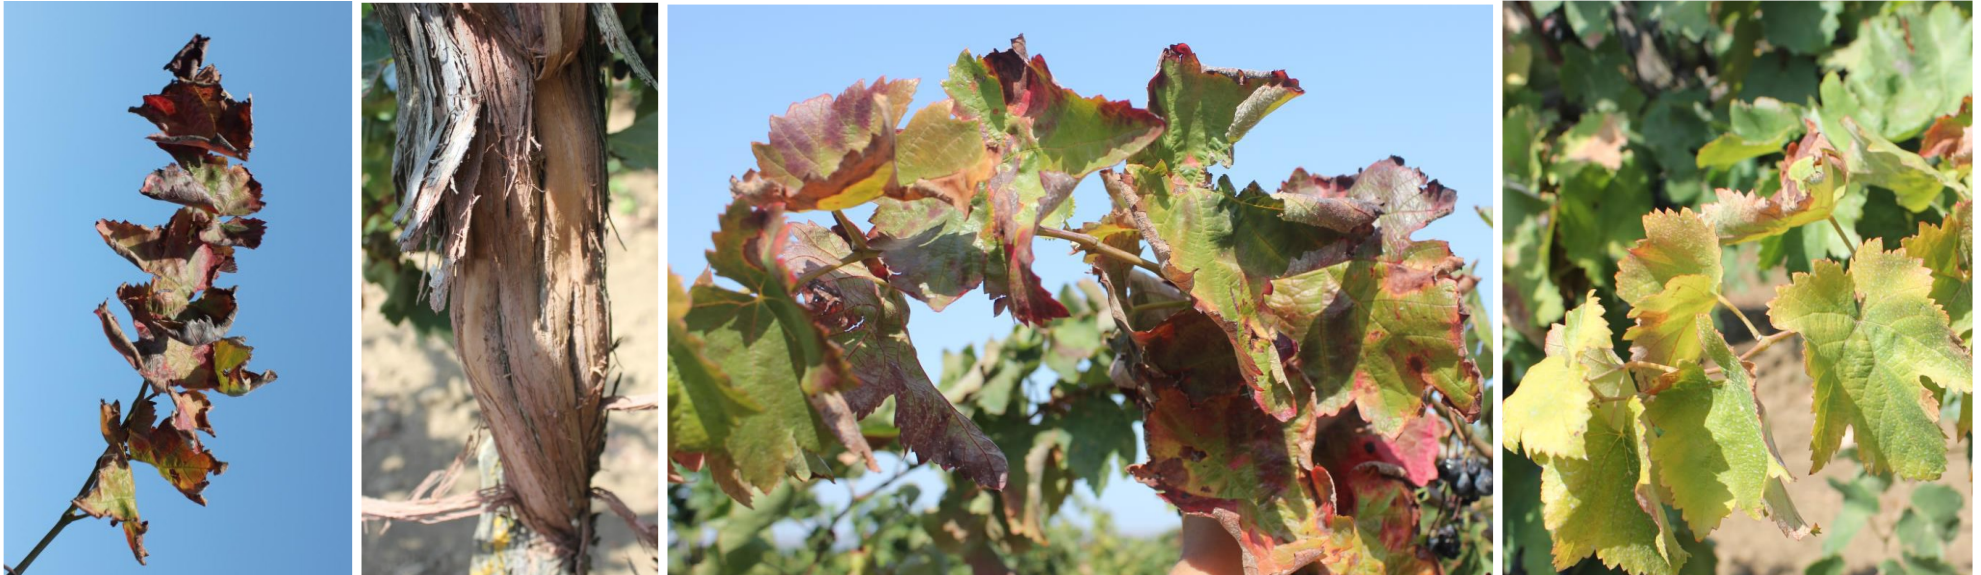



**Library Lib-04\_S21**

289 Chardonnay {GPGV, GRSPaV, GSyV-1, HSVd}

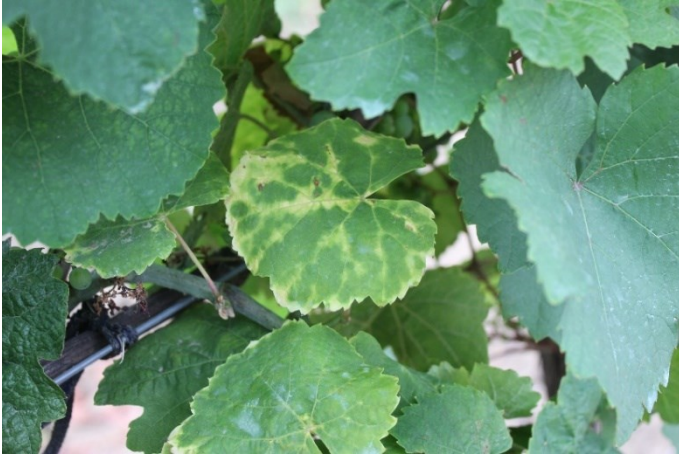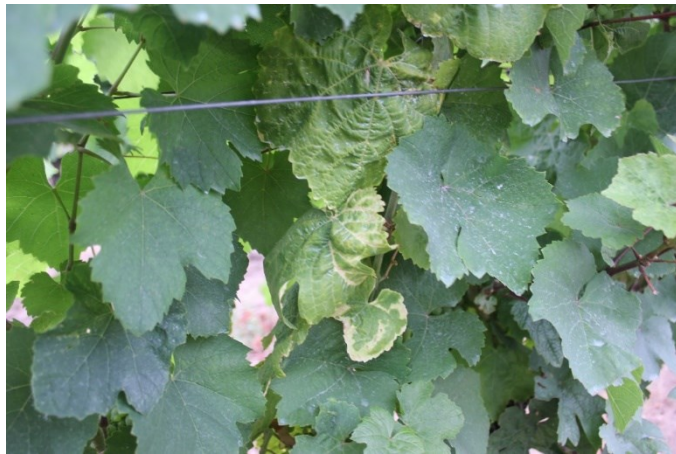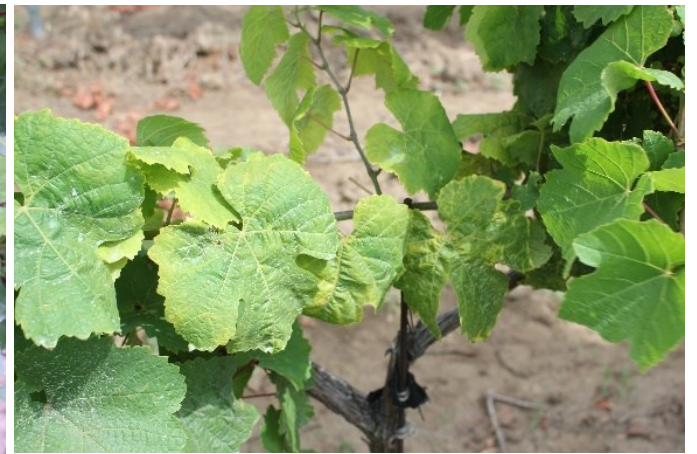

290 Riesling {GPGV}

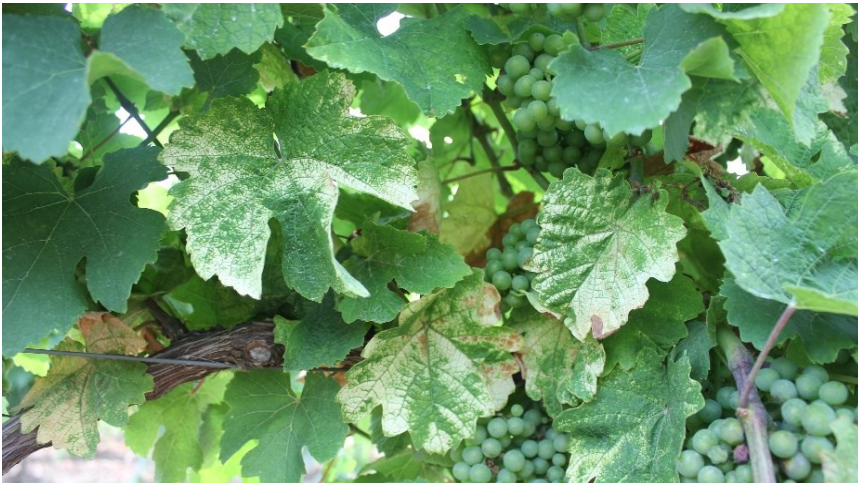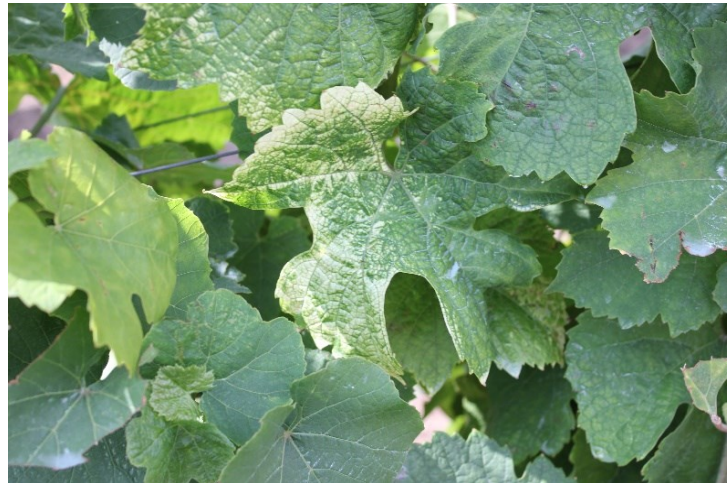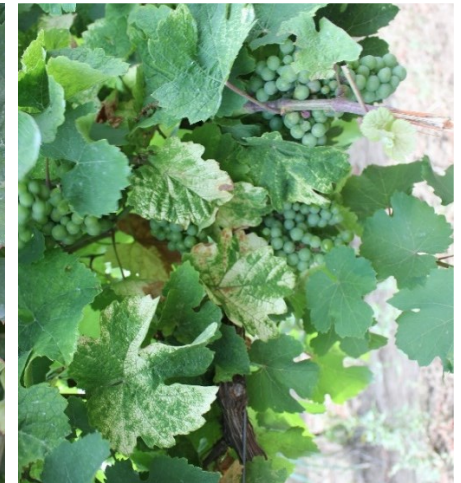



377 Moldova {GFkV, GPGV, GRSPaV, GSyV-1, GFLV, GYSVd-1, HSVd}

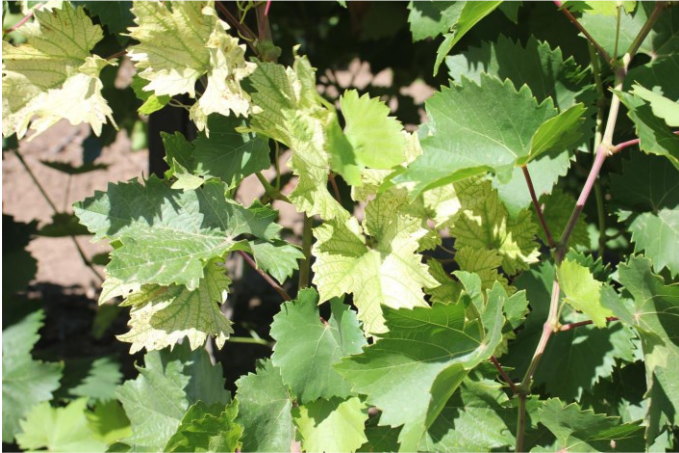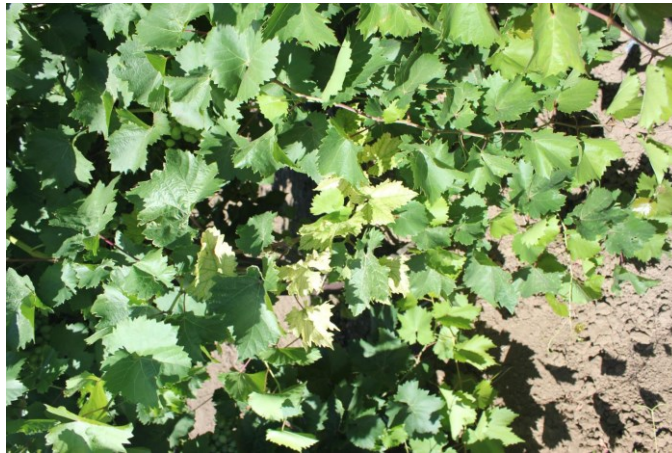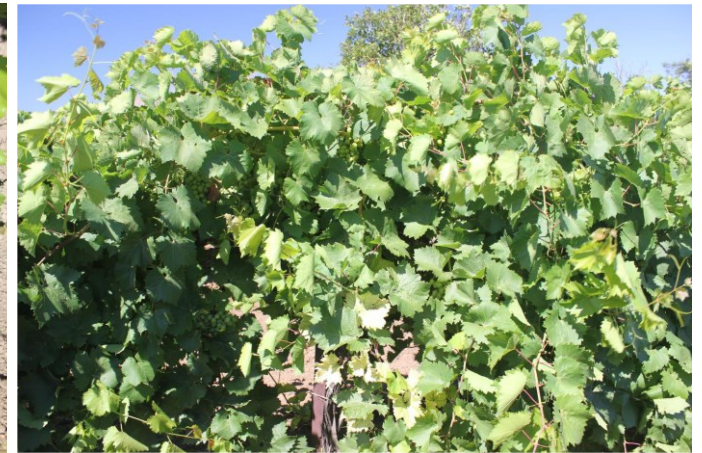

429 Moldova {GLRaV-3, GFkV, GPGV, GRVfV, GRSPaV, GSyV-1, HSVd}

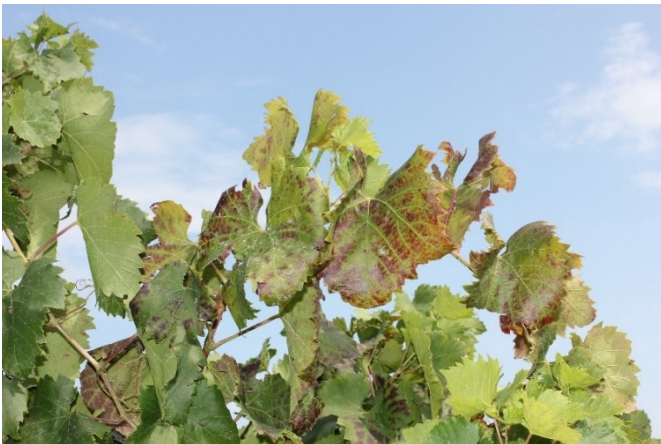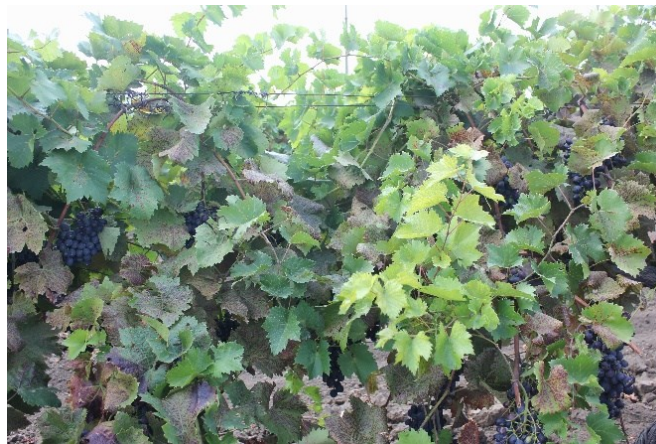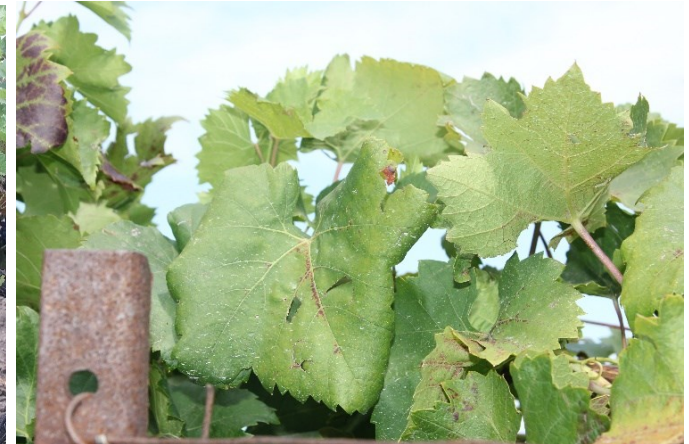



1524 Moldova {GVT, GPGV, GRSPaV, GSyV-1, GYSVd-1, HSVd}

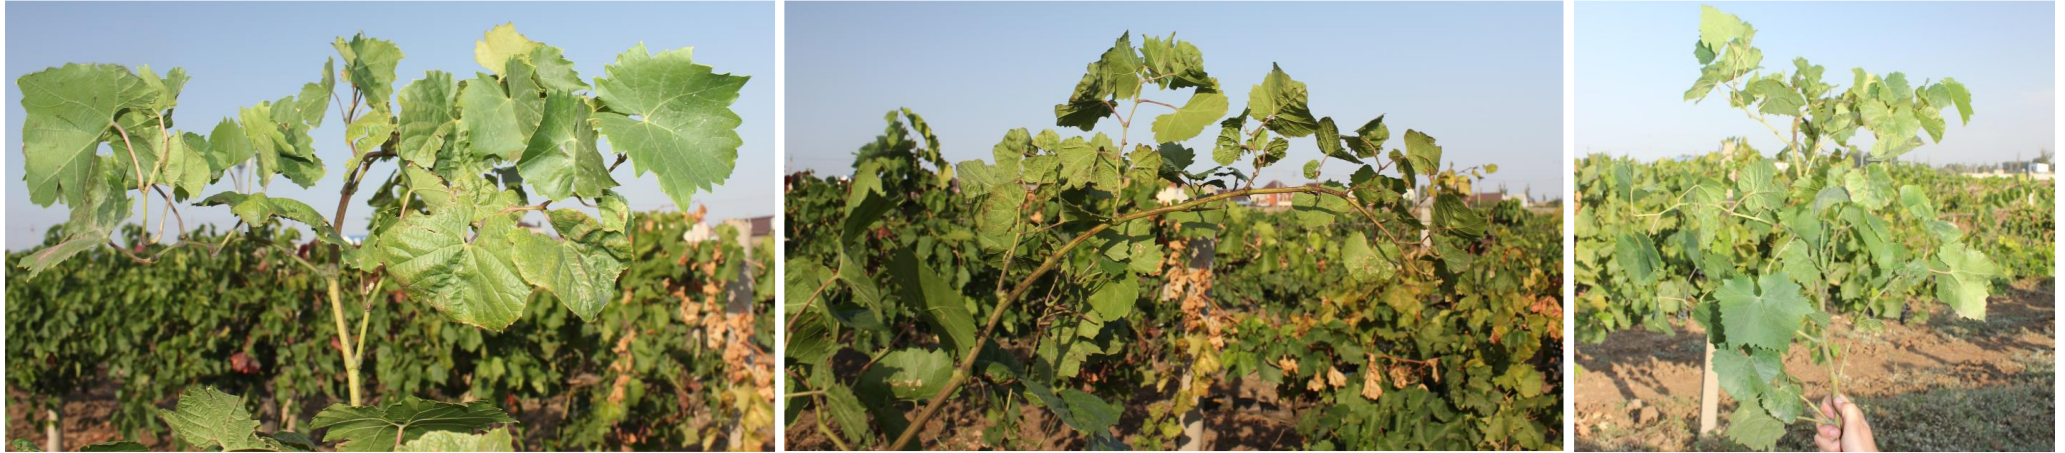

1533 Moldova {GPGV, GRSPaV, GSyV-1, GYSVd-1, HSVd}

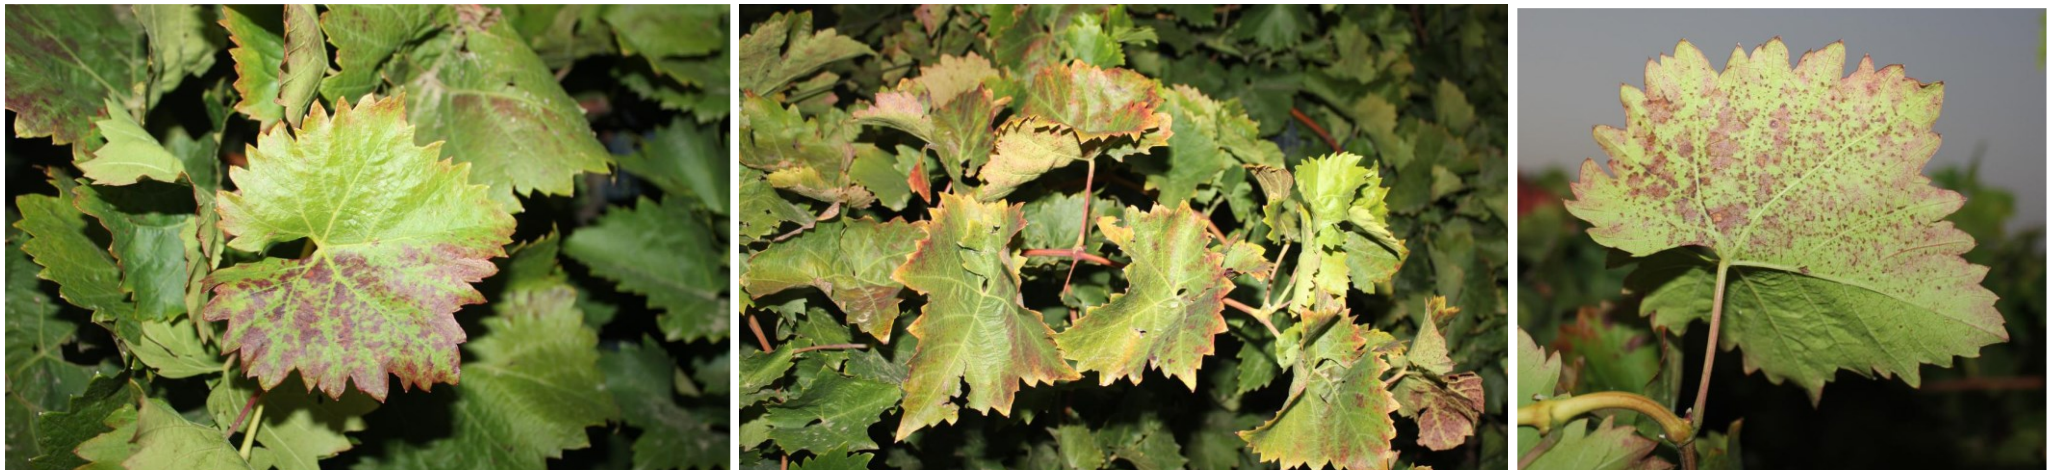



588 Chardonnay {GRSPaV, GSyV-1, GYSVd-1, GYSVd-2, HSVd}

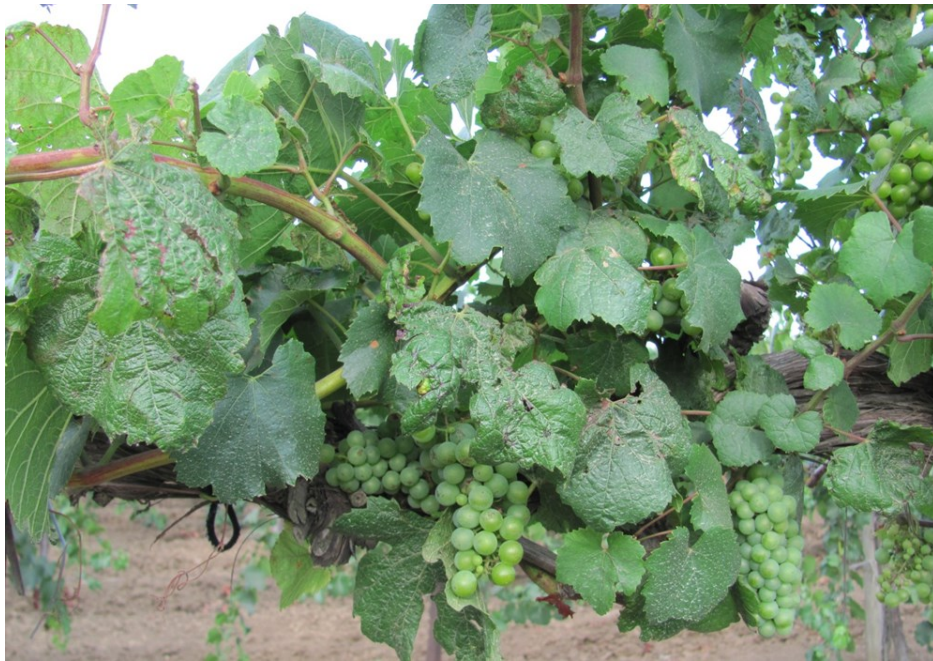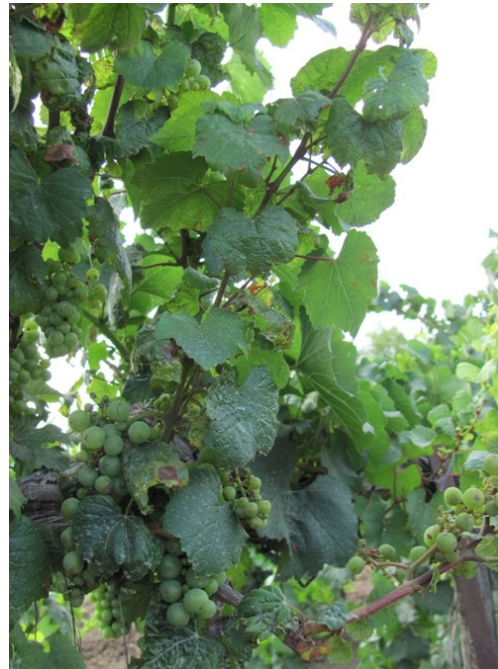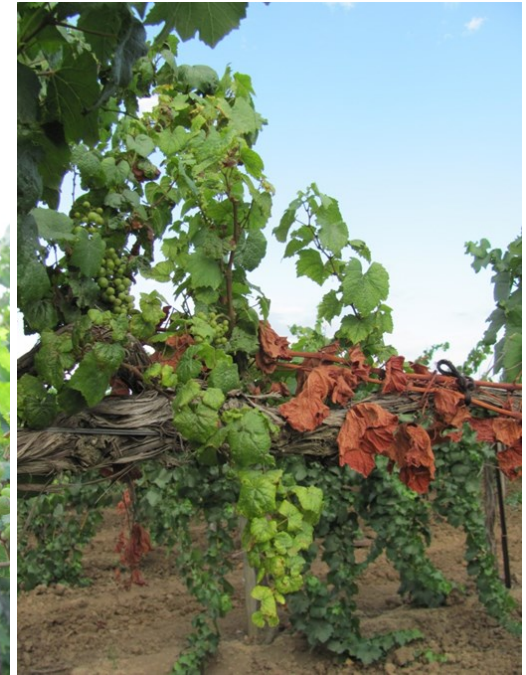



Library **Lib-05\_S22**

267 Rkatsiteli {GFkV, GPGV, GRSPaV, GSyV-1, GYSVd-2}

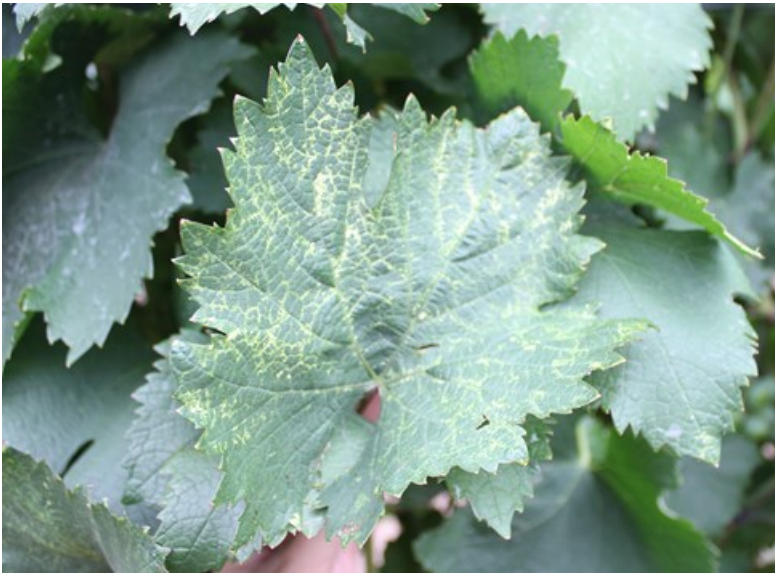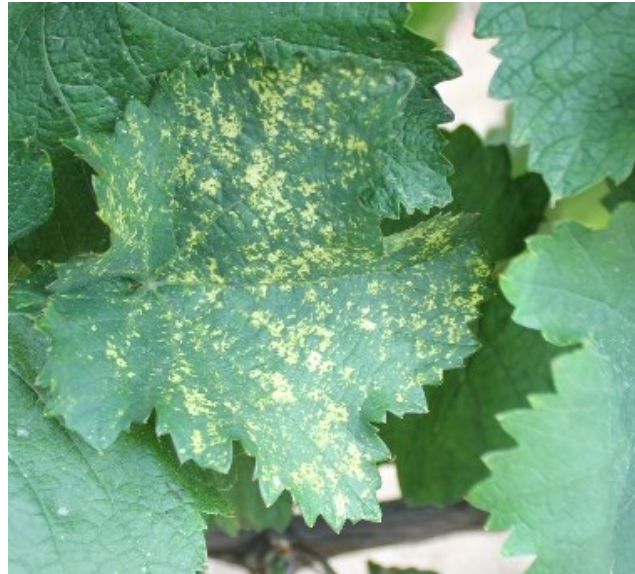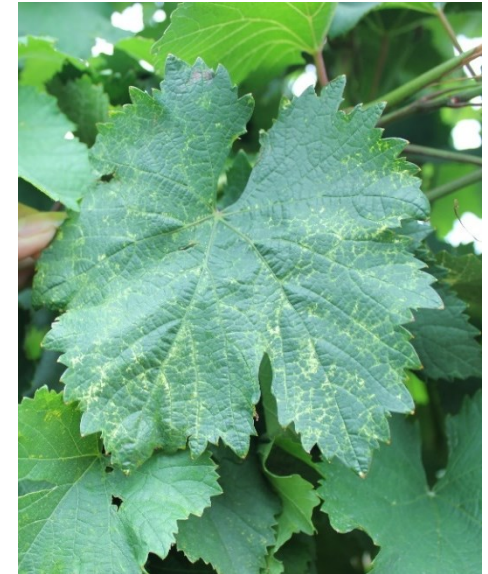

269 Rkatsiteli {GVT, GPGV, GRSPaV, GSyV-1, GFLV, GYSVd-1, HSVd}

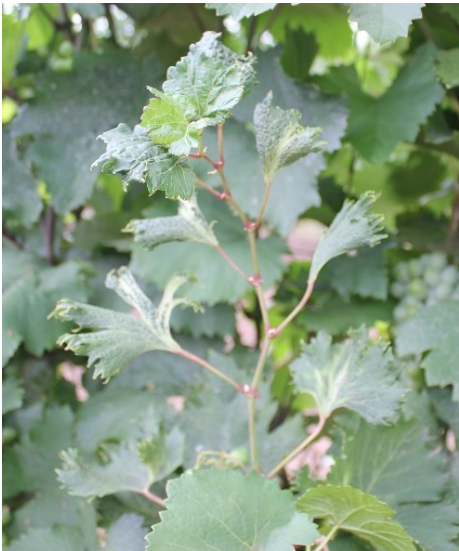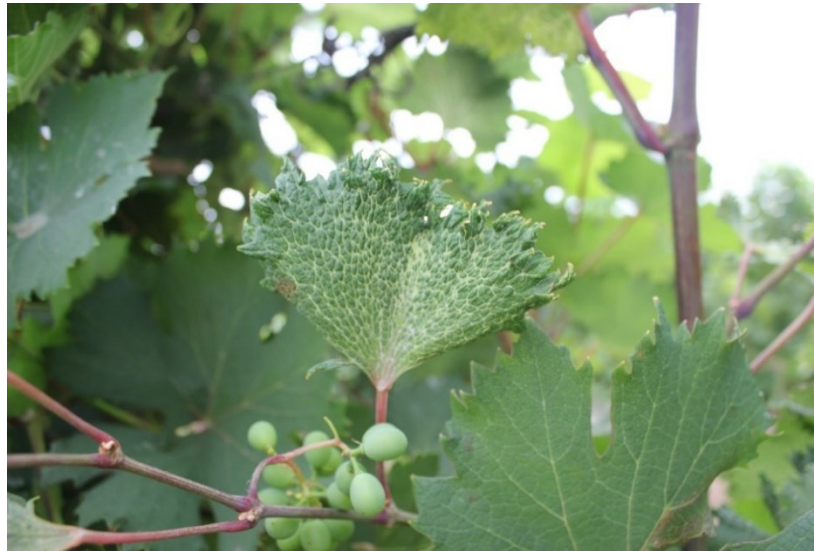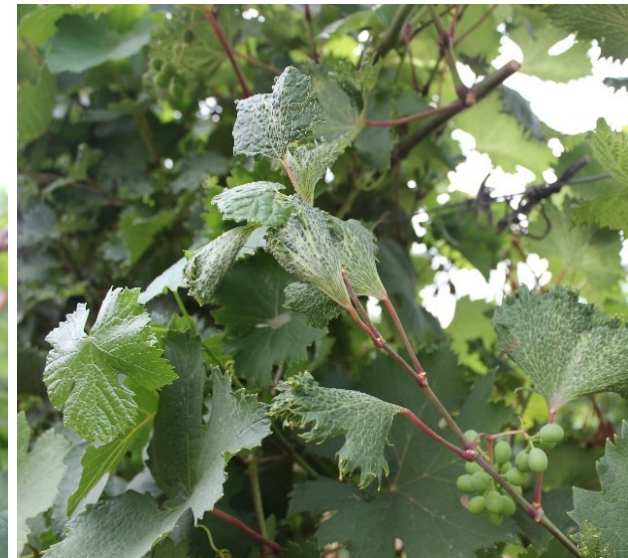



301 Zhupskij {GFkV, GVT, GPGV, GRVfV, GRSPaV, GVA, GSyV-1, GFLV, GYSVd-1, HSVd}

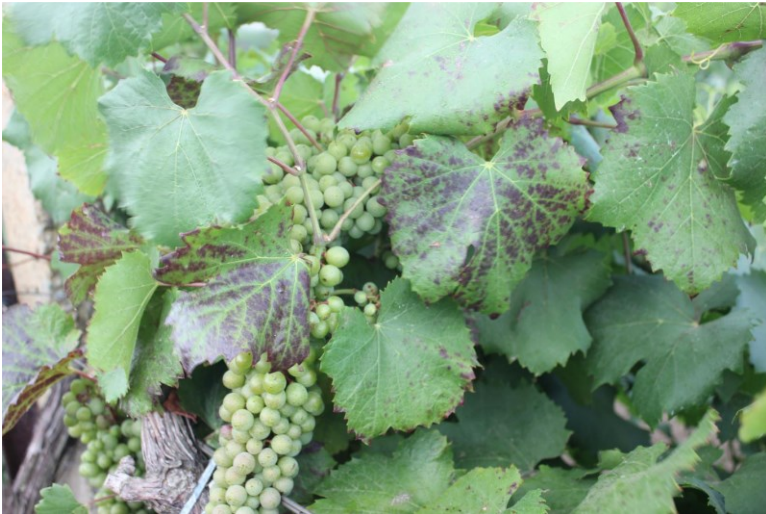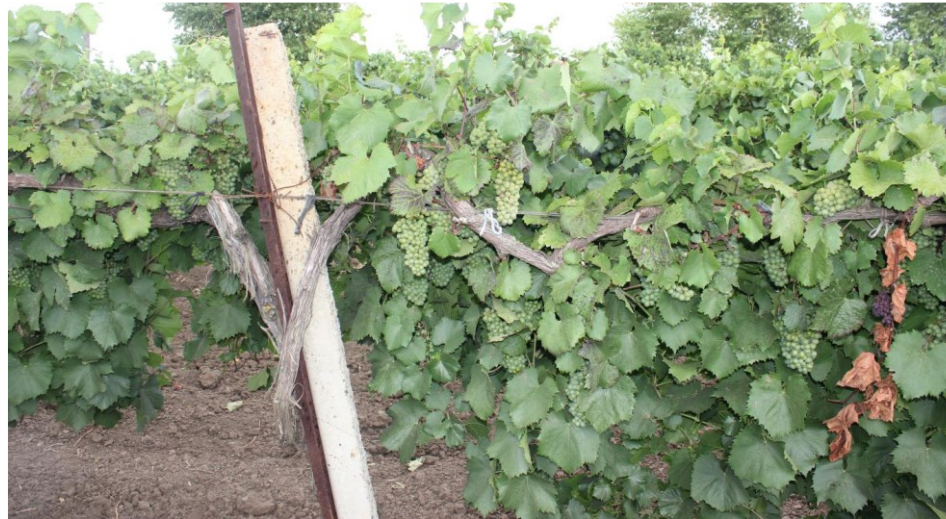

302 Cabernet Sauvignon {GPGV, GRSPaV, GSyV-1, GYSVd-1, GYSVd-2}

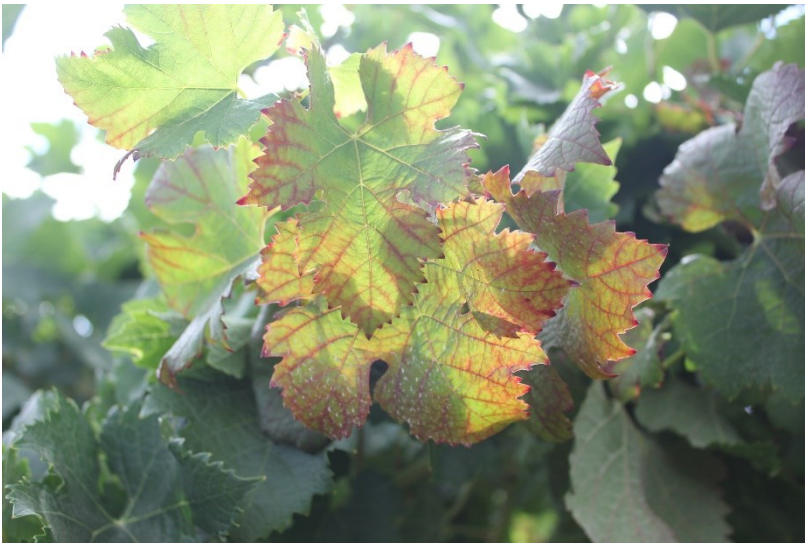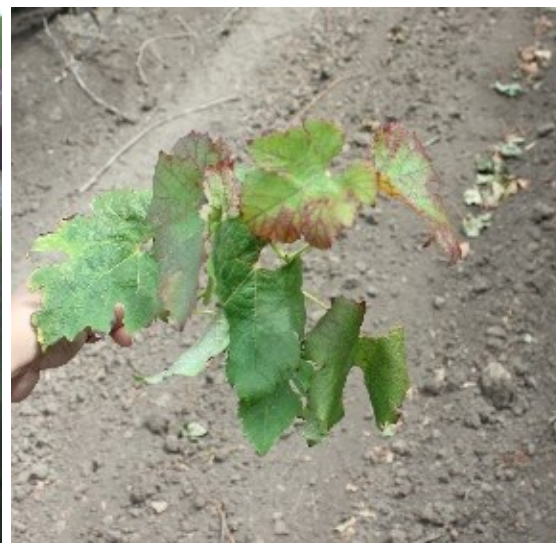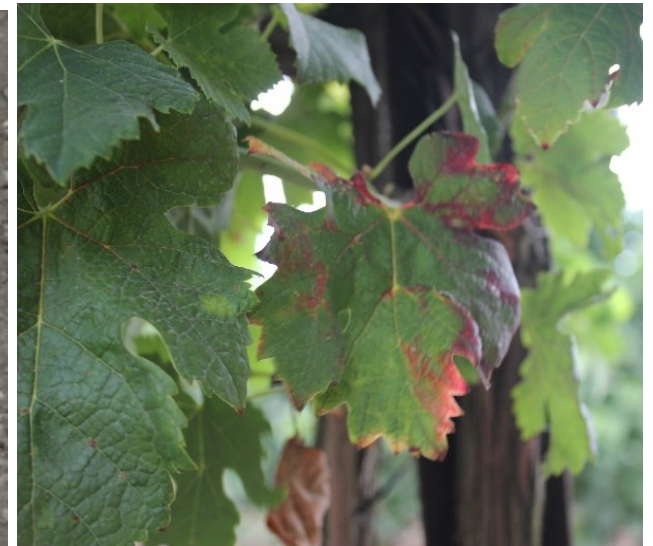



337 Cabernet Sauvignon {GFkV, GVT, GPGV, GRVFV, GRSPaV, GFLV, HSVd}

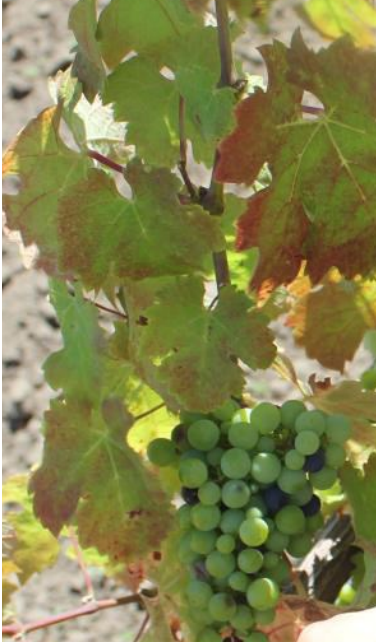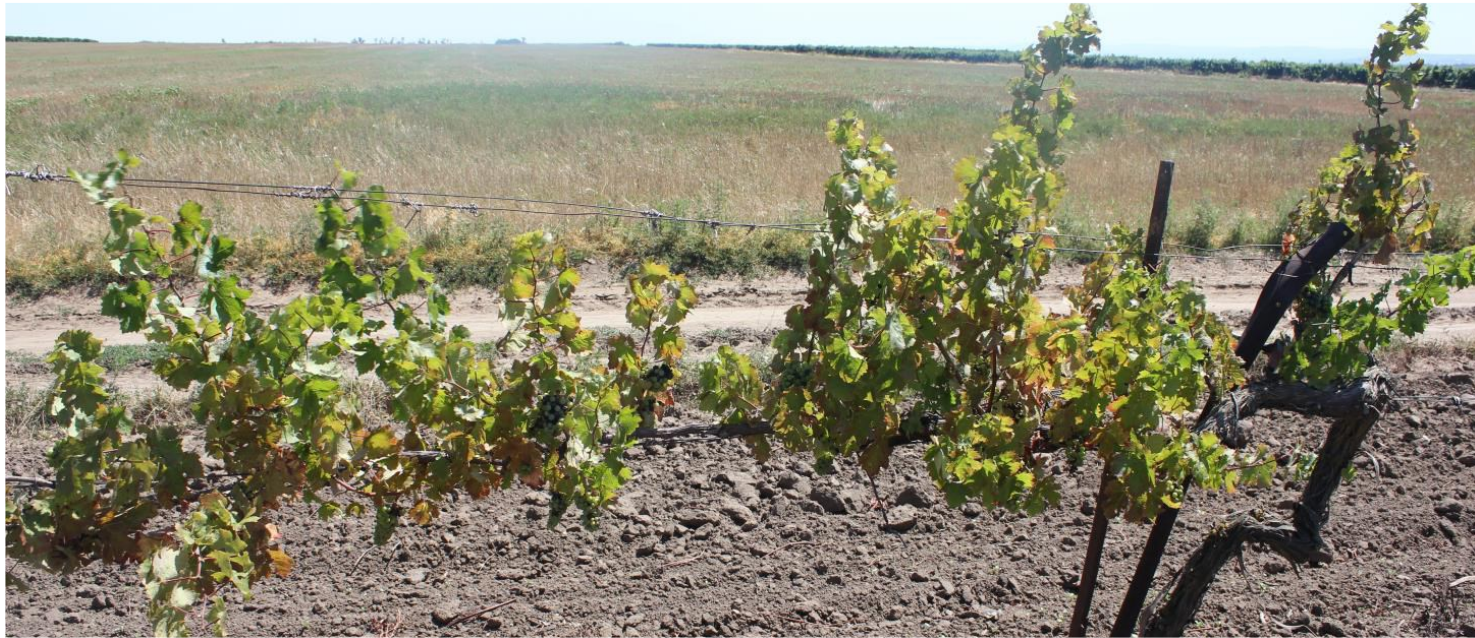

370 Cabernet Sauvignon {GFkV, GRVFV, GRSPaV, GSyV-1}

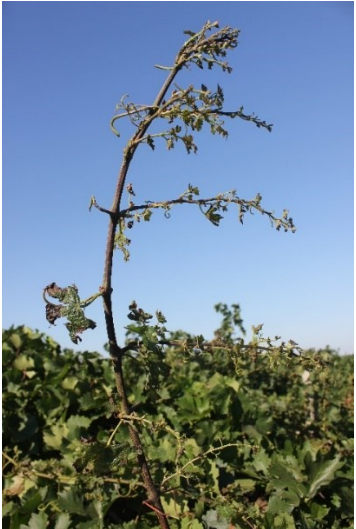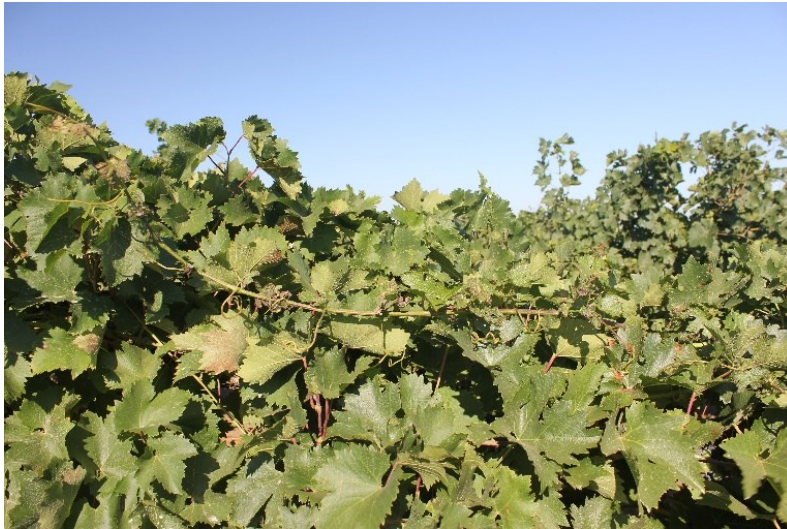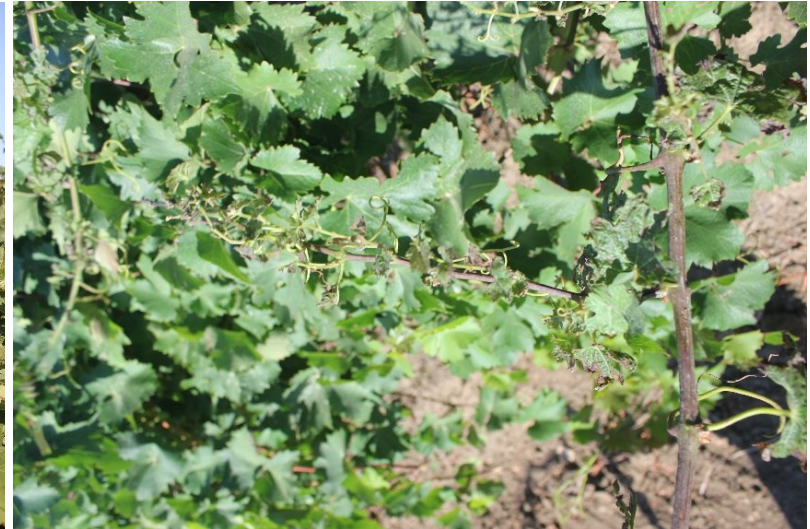



508 Augustine {GFkV, GPGV, GRSPaV, GSyV-1, GYSVd-1, HSVd}

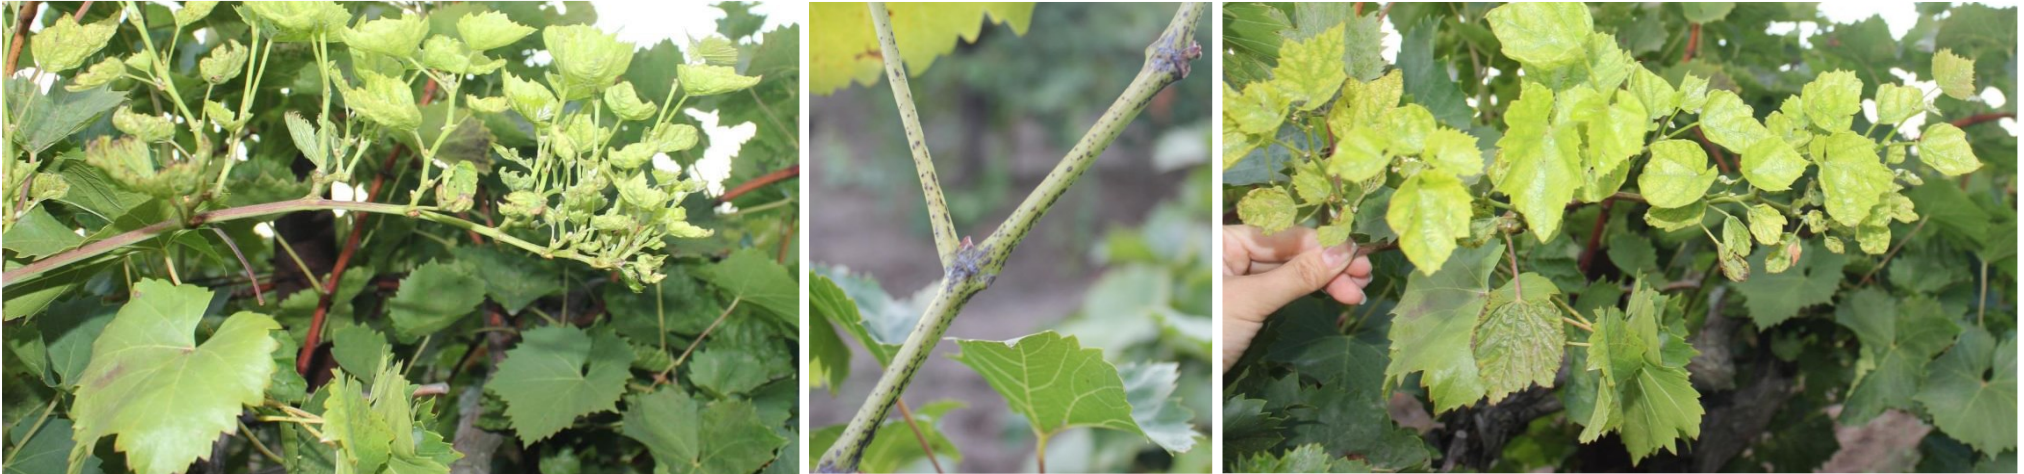

635 Frankovka {GFkV, GVT, GPGV, GRSPaV, GVA, GSyV-1, GYSVd-1, HSVd}

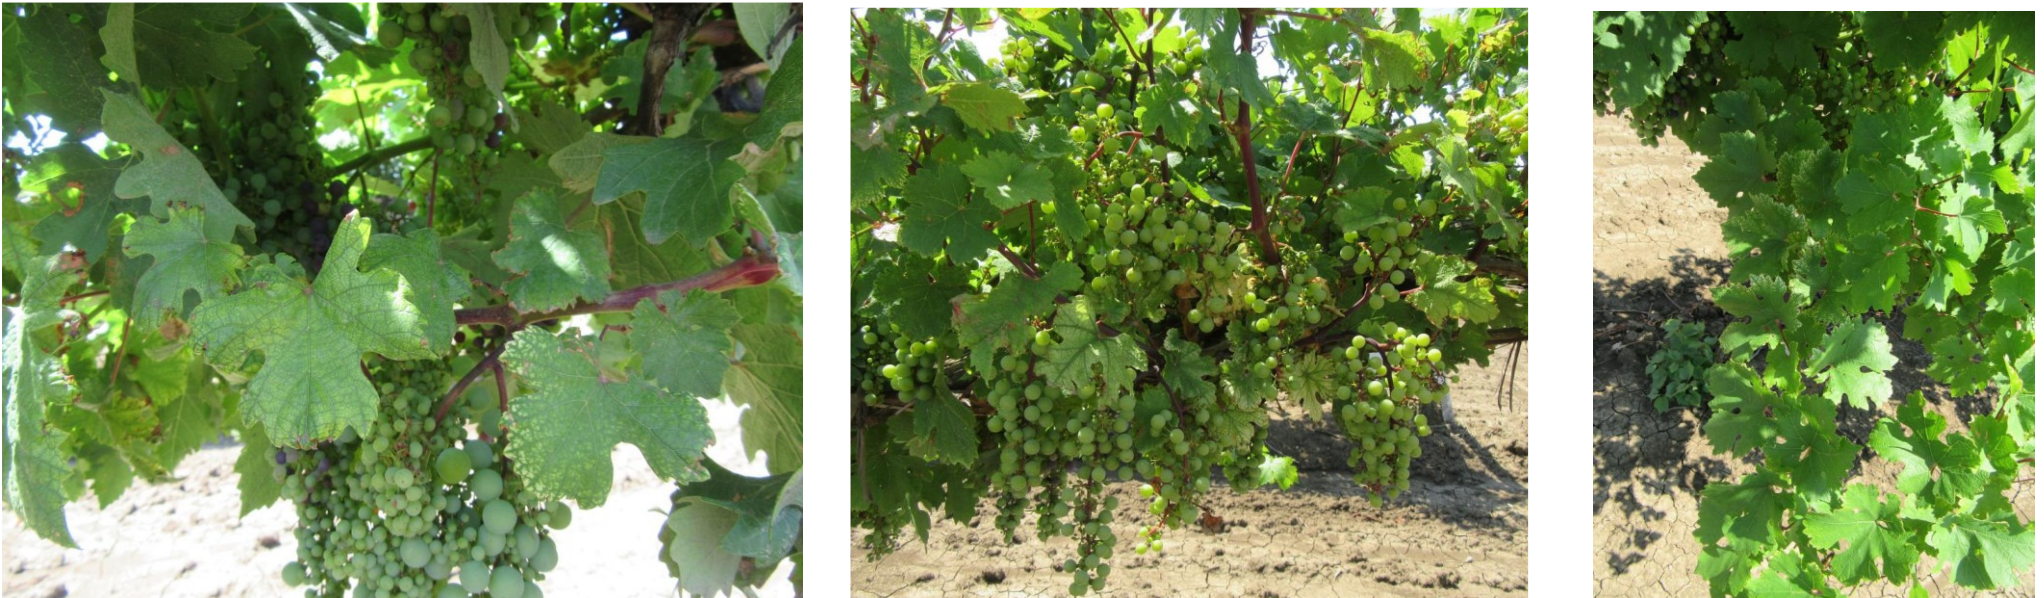



Library **Lib-06\_S23**

384 Merlot {GFkV, GPGV, GRSPaV, GYSVd-1, HSVd}

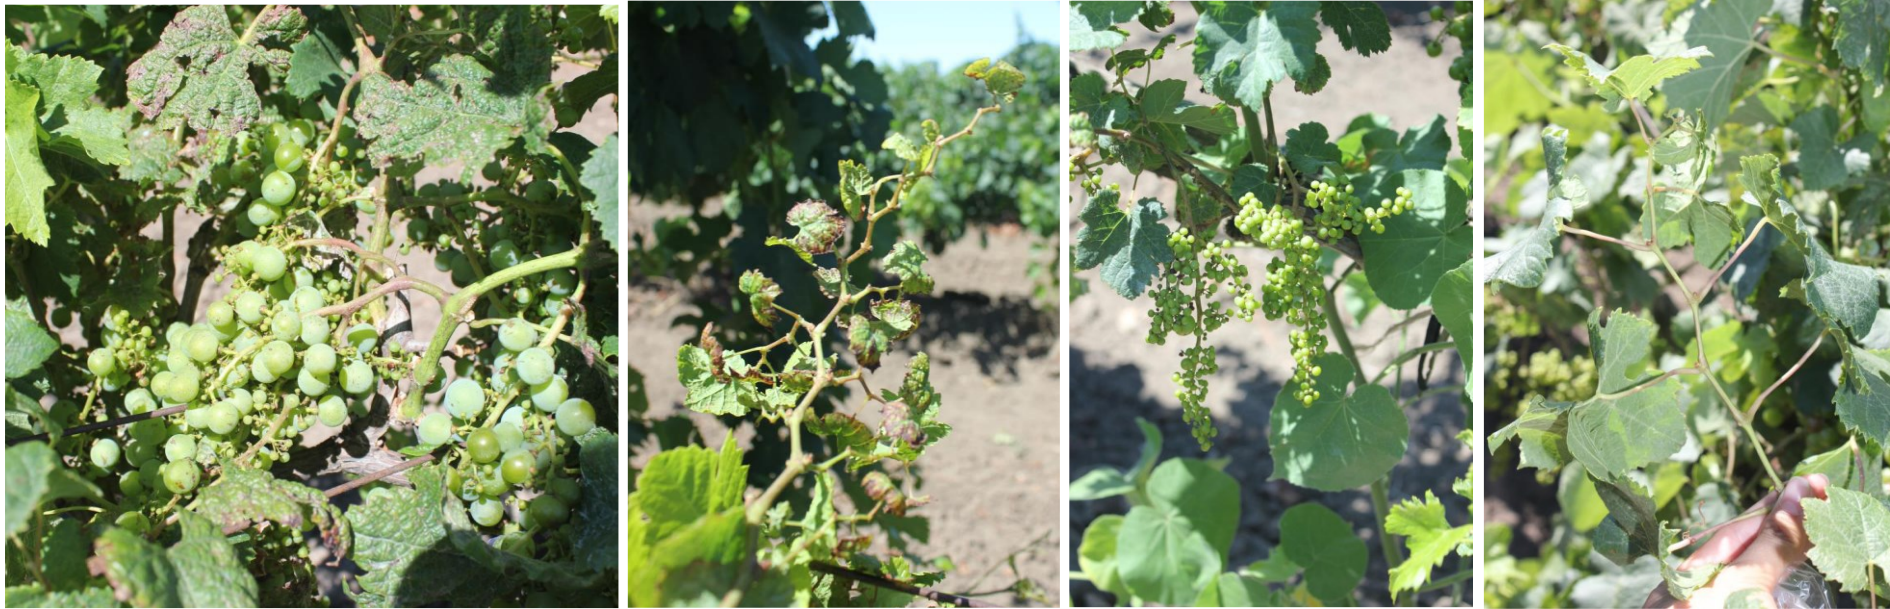

393 Isabella {GLRaV-1, GFkV, GPGV, GRSPaV, HSVd}

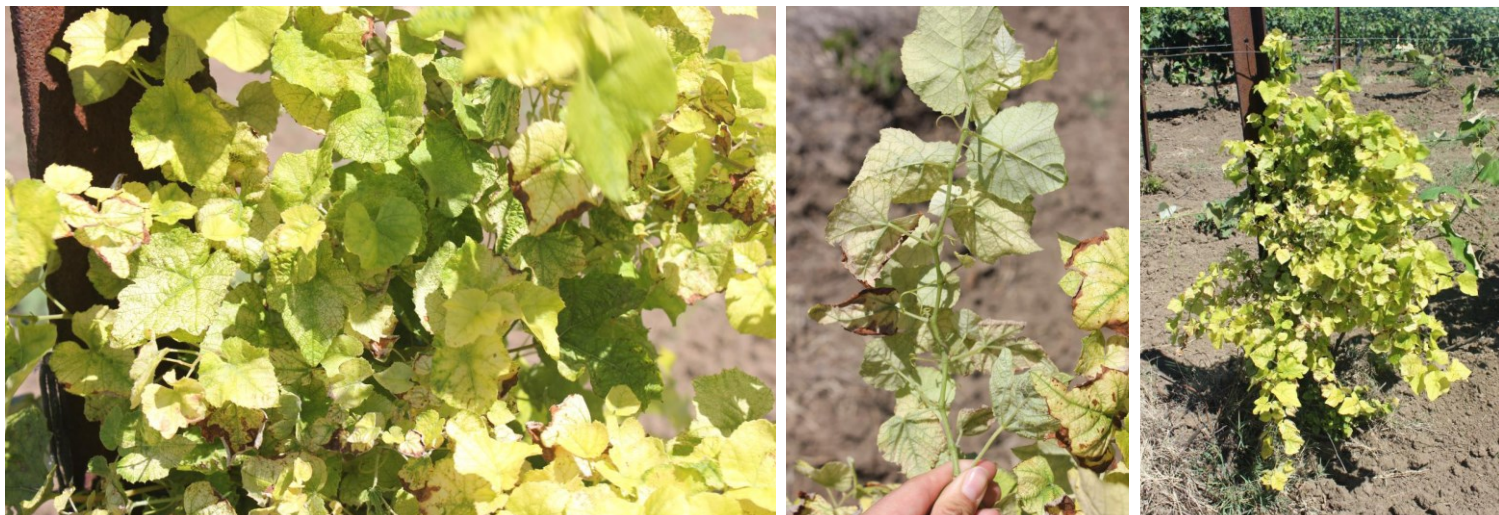



409 Syrah {GPGV, GRSPaV, GSyV-1, HSVd}

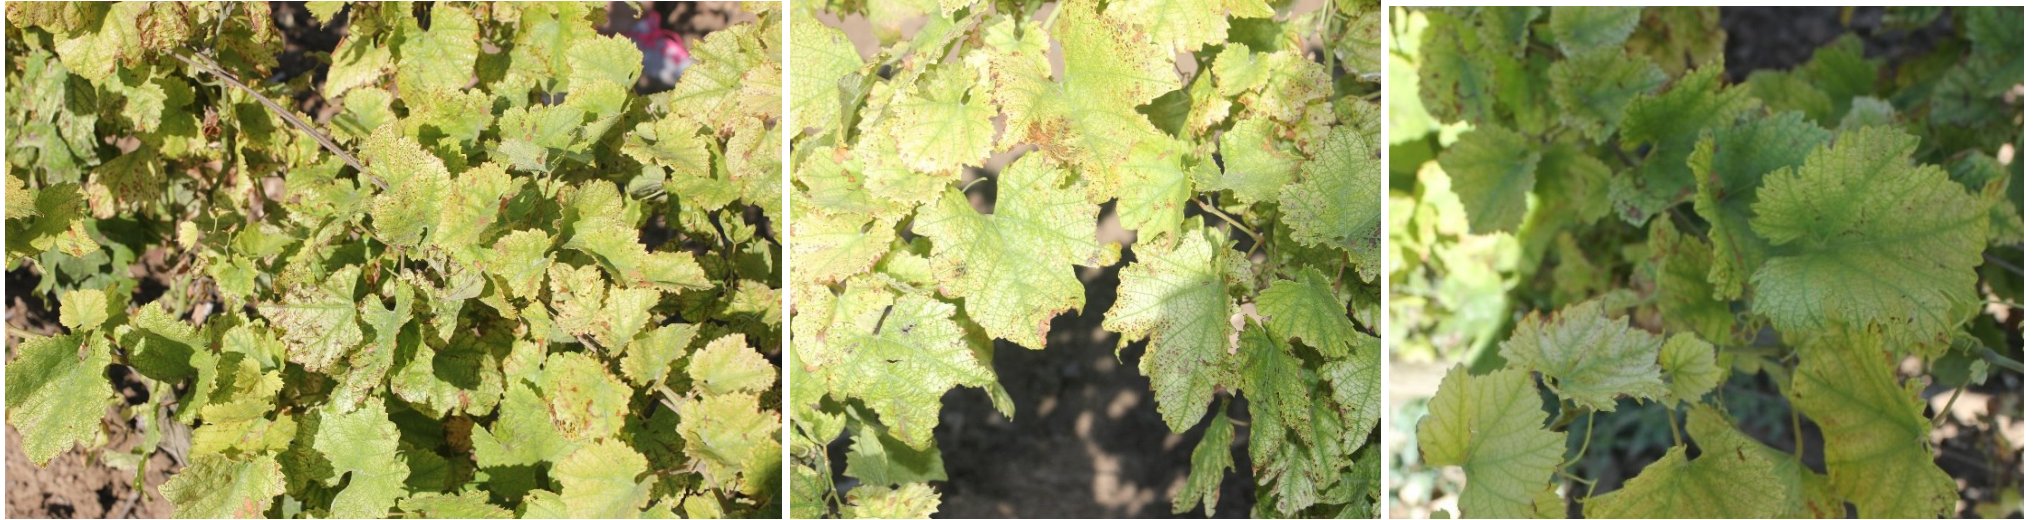

410 Syrah {GPGV, GRSPaV, GSyV-1, HSVd}

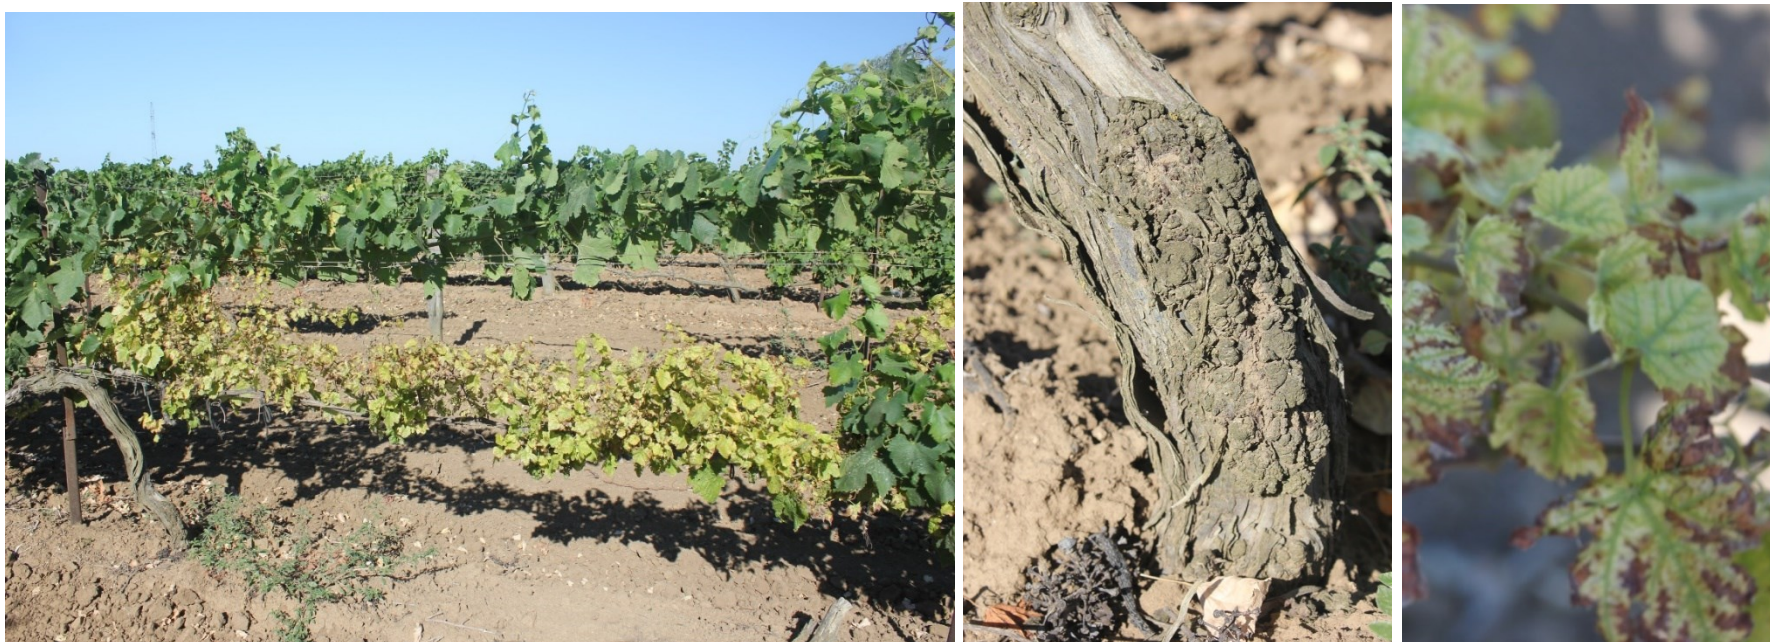



449 Chardonnay {GFkV, GPGV, GRVfV, GRSPaV, GVA, GSyV-1}

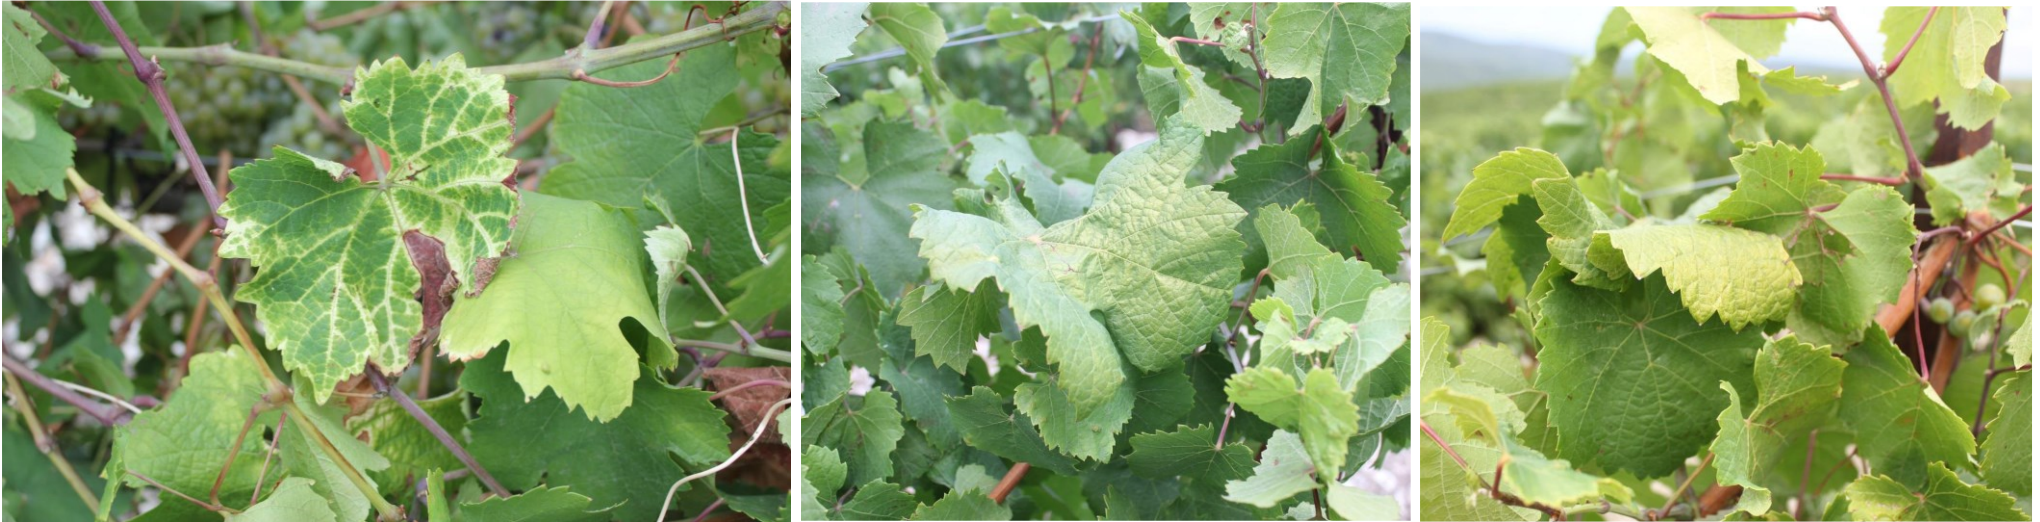

471 Aligoté {GLRaV-1, GVT, GVA, GSyV-1}

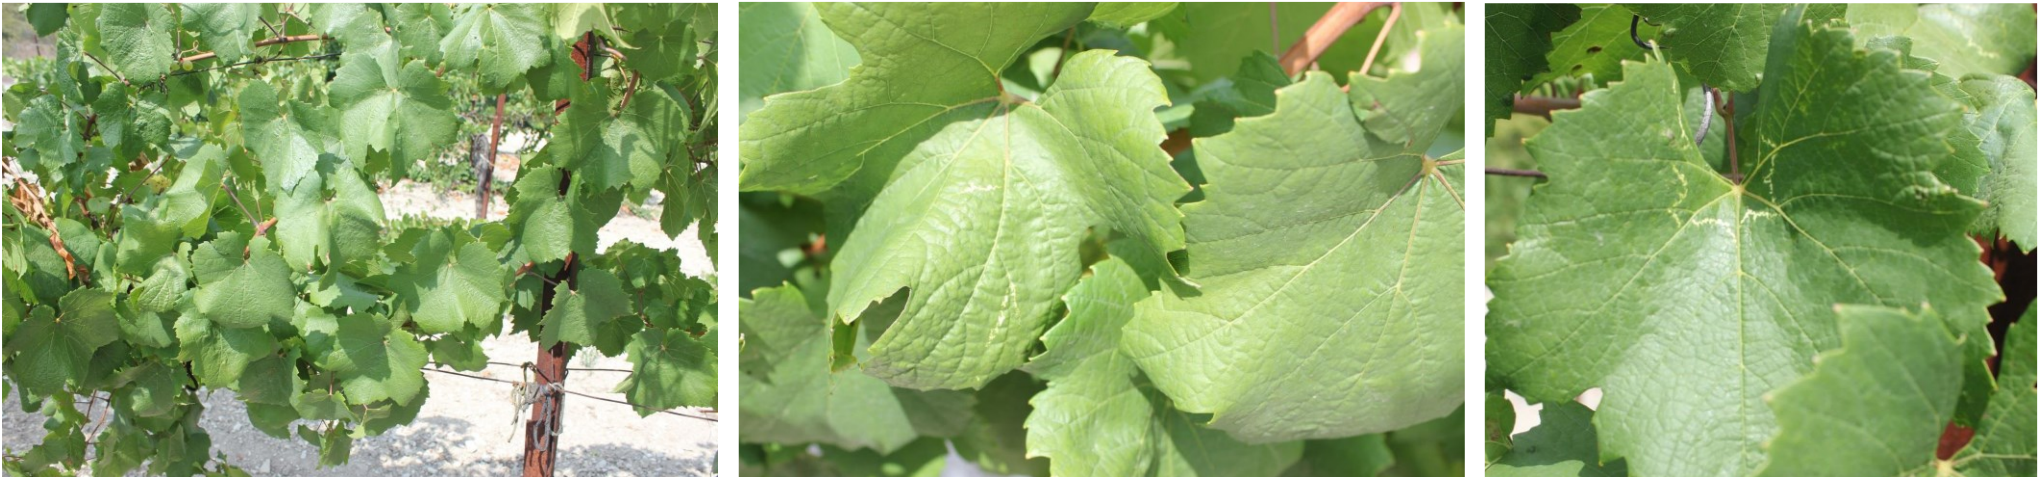



476 Riesling {GFkV, GRSPaV, GSyV-1, RBDV, GYSVd-1, HSVd}

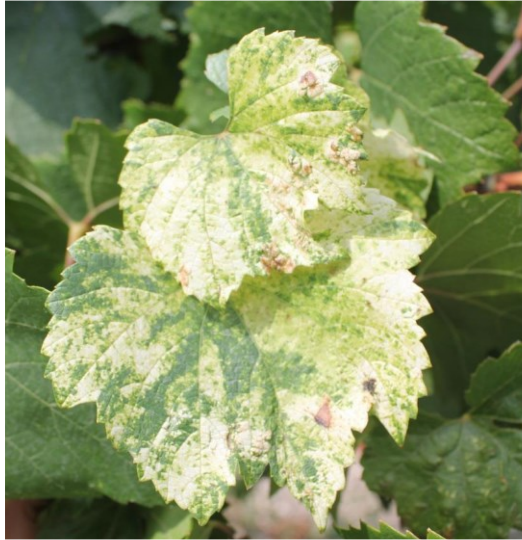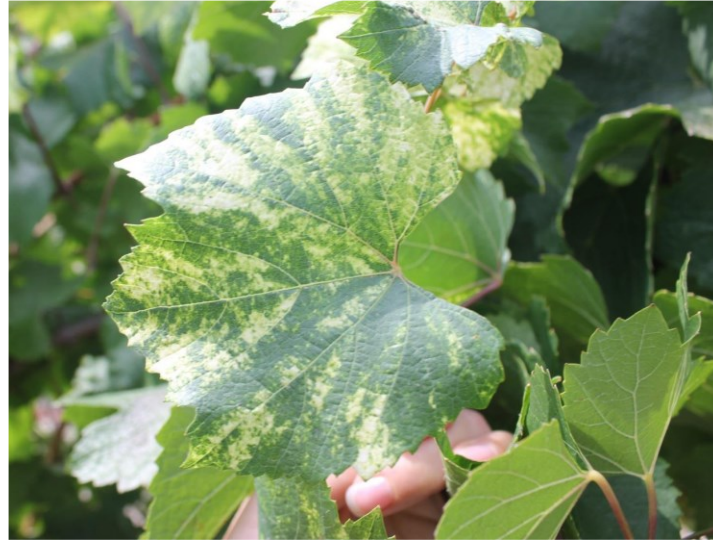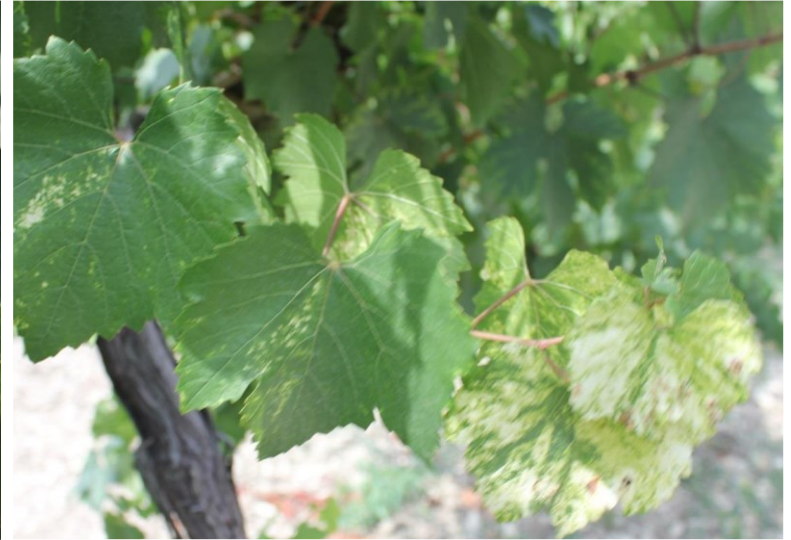

Supplement: s1 [file s1]
