# Supplementary material for: High-Throughput Sequencing of Small RNAs for Diagnostics of Grapevine Viruses and Viroids in Russia
Source: Viruses. 2021 Dec 3;13(12):2432. doi: 10.3390/v13122432 (PMC8709451; doi:10.3390/v13122432)
Supplement: Supplementary file 1 [file viruses-13-02432-s001.zip › Supplementary Tables.xlsx]

## Sheet: Table S1
Supplementary materials, Navrotskaya et al., 2021 High-Throughput Sequencing of Small RNAs for Diagnostics of Grapevine Viruses and Viroids in Russia
Supplementary Table S1
Basic information of sampled vineyards. [Exact coordinates are available in Google Earth https://earth.google.com/earth/d/1KymmhGwAdv4Wns6VikJ2W_R736-UeR-U?usp=sharing]
Library code	Samle number	Variety	Utilization	Species/interspecific hybrid	Symptoms
Zs85-SV2_S19	1606	Novichok	Table grape	Interspecific hybrid (private selection)	Dots on the veins, leaf rolling, yellow veins
	1609	Livia	Table grape	(Vitis viniferа+ Vitis rupestris + Vitis aestivalis) x ((Vitis vinifera х (Vitis vinifera + Vitis labrusca + Vitis riparia + Vitis rupestris + Vitis berlandieri + Vitis aestivalis + Vitis cinerea) х (Vitis vinifera))	Spots on the veins and short internodes
	1610	Livia	Table grape	(Vitis viniferа+ Vitis rupestris + Vitis aestivalis) x ((Vitis vinifera х (Vitis vinifera + Vitis labrusca + Vitis riparia + Vitis rupestris + Vitis berlandieri + Vitis aestivalis + Vitis cinerea) x (Vitis vinifera))	Reddish sections from the edge of the leaves
	1612	Preobrazhenie	Table grape	Vitis vinifera + Vitis berlandieri + Vitis rupestris + Vitis lambrusca + Vitis riparia + Vitis amurensis	Yellowing of shoot, mosaic, thickening between the rootstock and the variety node
	1615	Livia	Table grape	(Vitis viniferа+ Vitis rupestris + Vitis aestivalis) x ((Vitis vinifera х (Vitis vinifera + Vitis labrusca + Vitis riparia + Vitis rupestris + Vitis berlandieri + Vitis aestivalis + Vitis cinerea) x (Vitis vinifera))	Thickening between the rootstock and the variety node, short internodes, necrosis, yellowing and branching of the shoot
	1619	Livia	Table grape	(Vitis viniferа+ Vitis rupestris + Vitis aestivalis) х ((Vitis vinifera x (Vitis vinifera + Vitis labrusca + Vitis riparia + Vitis rupestris + Vitis berlandieri + Vitis aestivalis + Vitis cinerea) x (Vitis vinifera))	Reddish sections from the edge of the leaves, between veins, short internodes, yellowing of the whole plant
	1620	Livia	Table grape	(Vitis viniferа+ Vitis rupestris + Vitis aestivalis) х ((Vitis vinifera х (Vitis vinifera + Vitis labrusca + Vitis riparia + Vitis rupestris + Vitis berlandieri + Vitis aestivalis + Vitis cinerea) х (Vitis vinifera))	Yellowing, inferior growing, leaf deformation, rolling, necrotic spots, necrosis from the edge, short internodes
Lib-03_S20	263	Krasnostop Zolotovsky	Wine grape	Vitis vinifera Linne subsp. vinifera	Red veins from the edge of the leaves
	347	Krasnostop Zolotovsky	Wine grape	Vitis vinifera Linne subsp. vinifera	Red veins from the edge of the leaves, short internodes
	351	Pervenec Magaracha	Wine grape	Vitis vinifera х (Vitis vinifera x (Vitis vinifera + Vitis riparia + Vitis rupestris))	Leaf rolling, white section on the leaf
	622	Krasnostop Zolotovsky	Wine grape	Vitis vinifera Linne subsp. vinifera	Red sectores between veins, short internodes
	628	Krasnostop Zolotovsky	Wine grape	Vitis vinifera Linne subsp. vinifera	Red from the edge of the leaf, leaf rolling, short internodes
	650	Saperavi	Wine grape	Vitis vinifera Linne subsp. vinifera	Red from the edge of the leaf, leaf deformation, short internodes
	654	Saperavi	Wine grape	Vitis vinifera Linne subsp. vinifera	Changing colour from the edge of the leaf, it starts from the top of the plants, leaf deformation
	1512	Saperavi	Wine grape	Vitis vinifera Linne subsp. vinifera	Multi cloring (red and yellow) from the edge of the leaf, leaf deformation, short internodes, leaf rolling
	1515	Saperavi	Wine grape	Vitis vinifera Linne subsp. vinifera	Multi coloring (red and yellow) from the edge of the leaf, leaf deformation, short internodes, leaf rolling up and down
Lib-04_S21	289	Chardonnay	Wine grape	Vitis vinifera Linne subsp. vinifera	Leaf defromation white sections on the leaf starting from the veins, leaf rolling, phytoplasma like symptoms, yellowing of the whole plant
	290	Riesling	Wine grape	Vitis vinifera Linne subsp. vinifera	Leaf deformation whithening starts from the edge, leaf deformation, deformation of the edge
	377	Moldova	Table grape	Guzal Kara x Villard Blanc	Yellowing of the shoot, yellow mosaic, whitening from the edge
	429	Moldova	Table grape	Guzal Kara x Villard Blanc	Leaf roll symptoms, reddish gradient from the edge, re sections, not the veins, leaf rolling, yellowing of the young shoots
	1524	Moldova	Table grape	Guzal Kara x Villard Blanc	Short internodes, branching, short shoots, leaf rolling
	588	Chardonnay	Wine grape	Vitis vinifera Linne subsp. vinifera	Different size of berries, leaf deformations (mite looking), short internodes and yellowing of the young shoots
	1533	Moldova	Table grape	Guzal Kara x Villard Blanc	Leaf roll symptoms, reddish gradient from the edge, re sections, not the veins
Lib-05_S22	267	Rkatsiteli	Wine grape	Vitis vinifera Linne subsp. vinifera	Yellow spots and yellowing of small veins, small circlulat spots, yellow dots between veins
	269	Rkatsiteli	Wine grape	Vitis vinifera Linne subsp. vinifera	Severe leaf deformation, clorotic sections
	301	Zhupskij	Wine grape	Vitis vinifera Linne subsp. vinifera	Dark redish between the veins, leaf rolling
	302	Cabernet Sauvignon	Wine grape	Vitis vinifera Linne subsp. vinifera	Red veins starting from the edge, leaf rolling, dark redish between the veins, symptoms on the young leaves
	337	Cabernet Sauvignon	Wine grape	Vitis vinifera Linne subsp. vinifera	Redish color starting from the edge, yellowing of the whole plant, uneven maturation of berries, uneven surface
	370	Cabernet Sauvignon	Wine grape	Vitis vinifera Linne subsp. vinifera	Fanleaf like symptoms, abnormal shoots, lot of small branches with short internodes
	508	Augustine	Table grape	Vitis vinifera х (Vitis vinifera + Vitis labrusca + Vitis rupestris + Vitis berlandieri + Vitis lincecumii)	Lot of small branches with short internodes, yellowing of the plant
	635	Frankovka	Wine grape	Vitis vinifera Linne subsp. vinifera	Uneven ripening of berries, ligh yellowing, whitening starting from the edge
Lib-06_S23	384	Merlot	Wine grape	Vitis vinifera Linne subsp. vinifera	Uneven sized berries, zig-zag, leaf surface deformation
	393	Isabella	Wine grape	Vitis Labrusca linne x Meslier Petit	Yellow plant, supressed growth, dwarfism, necrosis
	409	Syrah	Wine grape	Vitis vinifera Linne subsp. vinifera	Yellow plant, suppressed growth, necrosis starting from the edge, , necrotic spots, mosaic, leaf rolling
	410	Syrah	Wine grape	Vitis vinifera Linne subsp. vinifera	Yellow plant, suppressed growth, necrosis starting from the edge, necrotic spots, mosaic, agrobacterium infection
	449	Chardonnay	Wine grape	Vitis vinifera Linne subsp. vinifera	Yellow veins, deformation of the leaves, necrosis between veins, gold leaves
	471	Aligoté	Wine grape	Vitis vinifera Linne subsp. vinifera	Line pattern, leaf rolling and leaf deformation
	476	Riesling	Wine grape	Vitis vinifera Linne subsp. vinifera	White sections between veins, yellow spots, ellowing between veins

## Sheet: Table S2
Supplementary materials, Navrotskaya et al., 2021 High-Throughput Sequencing of Small RNAs for Diagnostics of Grapevine Viruses and Viroids in Russia
Supplementary Table S2
Primers used for validation of HTS results
Pathogen's name		Primer Name	Primer Sequence (5'-3')	Funcion of the amplified region	PCR-product, bp	Reference
Virus	GLRaV-1	GLRaV-1_F	TCTTTACCAACCCCGAGATGAAC	coat protein (cp) gene	232	Gambino, Gribaudo, 2006
		GLRaV-1_R	GTGTCTGGTGACGTGCTAAACG
	GLRaV-2	V2dcpf2	ACGGTGTGCTATAGTGCGTG	coat protein (cp) gene	515	Bertazzon, Angelini, 2004
		V2cpr1	GCAGCTAAGTACGAATCTTC
	GLRaV-3	GLRaV-3_F	TACGTTAAGGACGGGACACAGG	coat protein (cp) gene	335	Gambino, Gribaudo, 2006
		GLRaV-3_R	TGCGGCATTAATCTTCATTG
	GLRaV-4	LR-5-HYF	TGGGATGAAYAARTTCAATGC	hsp70 gene	250	Padilla et al., 2010
		LR-5-HYR	TGAAATTCCTCATRTARGAGC
	GFkV	GFkVcp_F	CCCTCGTGTAAGCATCCAYCT	coat protein (cp) gene	257	Vinogradova, 2021
		GFkVcp_R	AAGACGGAGAGGATYTCRGA
	GVT	GVT_F1	CGCAGRTTYTGCATGTAYTACTC	coat protein (cp) gene	300	Vinogradova, 2021
		GVT_R	ATTGTARGCTGGRGCACCCAT
	GPGV	GPG-6609F	GAGATCAACAGTCAGGAGAG	movement protein (mp) gene	392	Glasa et al., 2014
		GPG-7020R	GACTTCTGGTGCCTTATCAC	coat protein (cp) gene
	GRVFV	GRVFV_F	CGCAGCCTCCACCACTCTGAAG	polyprotein gene	286	Daldoul et.al., 2018
		GRVFV_R	CAGGTAGCCCACAGAGGAC
	GRSPaV	RScp_F	TGGGCCAAGAAAGGRTTTAATGA	coat protein (cp) gene	208	Porotikova et al., 2021
		RScp_R	CCGCTTKCCTTCAGCCATAG			Dmitrenko et al., 2016
	GVA	GVA_F	GGGTACATCGCCTTGGTCGG	coat protein (cp) gene	350	This work
		GVA_R	TCGAACATAACCTGTGGCTC			Eichmeier et al., 2016
	GSyV-1	SY5922F	CCAATGGGTCGCACTTGTTG	coat protein (cp) gene	374	Glasa et al., 2015
		SY6295R	ACTTCATGGTGGTGCCGGTG
	GFLV	Nepo-A_(s/a)	TGDCCASWVARYTCYCCATA	coat protein (cp) gene	259	Digiaro et al., 2007
		GFLV-sp-s	TCAGATTTTAAGGGCGTCCA	RNA2-88
		GFLV-cp433	GAACTGGCAAGCTGTCGTAGAA	coat protein (cp) gene	480	Osman, Rowhani, 2006
		GFLV-cp912	GCTCATGTCTCTCTGACTTTGAC
	RBDV	RBDV_N3 (I)	GGTGTCTGGCTGTTTAAGCG	non-structural polyprotein	1337 bp	Barbara et al., 2001
		RBDV_N4 (I)	GGGATATAGCCACTTGTAGCG
		RBDV_268 (II)	ACGGTGCTATTATGACTGTGT
		RBDV_269 (II)	GGTAGGTCATAACCGGAATG
Viroid	GYSVd-1	GYSVd-1-mF	CAAAGCCCTTTTTCTTTCAACTGAG	partial genome	249	Hajizadeh et al., 2012
		GYSVd-1-mR2	CCCAGAGCAGCGTGGYYY
	GYSVd-2	GYSVd-2-P1	ACTAGTACTTTCTTCTATCTCCGAAGC	complete genome	375	Jiang et al., 2009
		GYSVd-2P2	ACTAGTCCGAGGACCTTTTCTAGCGCTC
	HSVd	HSVd-78P	AACCCGGGGCAACTCTTCTC	complete genome	298–307	Sano et al., 2001
		HSVd-83V	AACCCGGGGCTCCTTTCTCA
	AGVd	AGVd-mF	GTCCTCAGGAGAGCACCGG	partial genome	195	Hajizadeh et al., 2012
		AGVd-mR	GAAAACTGGTTGGGACCGCTG
Non-validated	GLRaV-2RG (= GRSLaV)	GLRaV-2_RGpl9r2	AGACTTGACGACTAGTAATG	p19 gene	760	Bertazzon, Angelini, 2004
		GLRaV-2_V2dCPf2	ACGGTGTGCTATAGTGCGTG	CPm gene
		RGHSP227-V	GCGACTCCAG CAACTTTAGTGA	HSP70h region	551	Rowhani et al., 2000
		RGHSP777-C	GTCTAACGAAAGATCGGGTTCTAAG
	ArMVsat	A/Gsat2	ATTGTCGTGTAAGCACCGTG	hypothetical protein	300	Wetzel et. al., 2005
		oligo(dG)	GTGATATCGGGGGGGGGGGG
		A/Gsat1	ATTGTCGTGTAAGCACCGT		777
		NW-2	CTGCTGTTTGTGTCCAAGCG
	ArMV	Nepo-A_a	TGDCCASWVARYTCYCCATA	coat protein (cp) gene	301	Digiaro et al., 2007
		ArMV-sp-s	GCGGGAATATATCTGAAA	RNA2-47
		ArMV_CP_1202F	CTGTGCCATCCTTCCCCAATGAT	coat protein (cp) gene	293	Osman, Rowhani, 2006
		ArMV_CP_1313R	GAGATGCTCCATCCATGCCAGT
		ArMVFw	TGACAACATGGTATGAAGCACA	RNA-dependent RNA polymerase	402	Gambino, Gribaudo, 2006
		ArMVRev	TATAGGGCCTTTCATCACGAAT
	GDefV	Nepo-A_a	TGDCCASWVARYTCYCCATA	coat protein (cp) gene	371	Digiaro et al. 2007
		GDefV-sp-s	GCCCAGGATGAGCTCTACTAC	RNA2-18
		N66-1	GGTCCTATAACATACGGGGCTG	coat protein (cp) gene	240	Cigar et al., 2003
		N66-2	CCCCTGATGGTGCTATTGGTCC
	GFLV sat	FP3-F	GTGGSCCCGCRAGTGT	hypothetical protein	870	Cepin et al., 2016
		RP-R	TAAWGAGCAACCAAAATCCCA
		NepSatF	CGTGTAAGCACCGTGCACG	hypothetical protein	970	Gottula et al., 2013
		NepSatR	GGCTAATGAGCAACCAAAATCCC
	GRGV	RG4847F	TGGTCTGTTGTTCGCATCTT	RNA-dependent RNA polymerase	1249 bp	Cretazzo, Velasco, 2017
		RG6076R	CGGAAGGGGAAGCATTGATCT
		RG6061F	CCGAGCTTCTCTCCAAGATCA	coat protein (cp) gene	736 bp
		RG6801R	ACTTAACGTAGGCCACTGGGT
	References:
1	Barbara, D. J., Morton, A., Ramcharan, S., Cole, I. W., Phillips, A., & Knight, V. H. (2001). Occurrence and distribution of Raspberry bushy dwarf virus in commercial Rubus plantations in England and Wales. Plant pathology, 50(6), 747-754.
2	Bertazzon, N., & Angelini, E. (2004). Advances in the detection of Grapevine leafroll-associated virus 2 variants. Journal of Plant Pathology, 283-290.
3	Čepin, U., Gutiérrez‐Aguirre, I., Ravnikar, M., & Pompe‐Novak, M. (2016). Frequency of occurrence and genetic variability of Grapevine fanleaf virus satellite RNA. Plant Pathology, 65(3), 510-520.
4	Cigsar, I., Digiaro, M., Gokalp, K., Abou Ghanem-Sabanadzovic, N., De Stradis, A., Boscia, D., & Martell, G. P. (2003). Grapevine deformation virus, a novel nepovirus from Turkey. Journal of Plant Pathology, 85(3), 183-191.
5	Cretazzo, E., & Velasco, L. (2017). High‐throughput sequencing allowed the completion of the genome of grapevine Red Globe virus and revealed recurring co‐infection with other tymoviruses in grapevine. Plant Pathology, 66(7), 1202-1213.
6	Daldoul, S., Massart, S., Ruiz-García, A. B., Olmos, A., & Wetzel, T. (2018). First Report of Grapevine rupestris vein feathering virus in grapevine in Germany. Plant disease, 102(10), 2053-2053.
7	Digiaro, M., Elbeaino, T., & Martelli, G. P. (2007). Development of degenerate and species-specific primers for the differential and simultaneous RT-PCR detection of grapevine-infecting nepoviruses of subgroups A, B and C. Journal of Virological Methods, 141(1), 34-40.
8	Dmitrenko, U. D., Porotikova, E. V., Gorislavets, S. M., Risovannaya, V. I., Volkov, Y. A., Stranishevskaya, E. P., ... & Vinogradova, S. V. (2016). First Report of Grapevine rupestris stem pitting-associated virus in Russia. Plant Disease, 100(12), 2542-2542.
9	Eichmeier, A., Komínková, M., Komínek, P., & Baránek, M. (2016). Comprehensive virus detection using next generation sequencing in grapevine vascular tissues of plants obtained from the wine regions of Bohemia and Moravia (Czech Republic). PLoS One, 11(12), e0167966.
10	Gambino, G., & Gribaudo, I. (2006). Simultaneous detection of nine grapevine viruses by multiplex reverse transcription-polymerase chain reaction with coamplification of a plant RNA as internal control. Phytopathology, 96(11), 1223-1229.
11	Glasa, M., Predajňa, L., Komínek, P., Nagyová, A., Candresse, T., & Olmos, A. (2014). Molecular characterization of divergent grapevine Pinot gris virus isolates and their detection in Slovak and Czech grapevines. Archives of virology, 159(8), 2103-2107.
12	Glasa, M., Predajňa, L., Šoltys, K., Sabanadzovic, S., & Olmos, A. (2015). Detection and molecular characterisation of Grapevine Syrah virus-1 isolates from Central Europe. Virus Genes, 51(1), 112-121.
13	Gottula, J., Lapato, D., Cantilina, K., Saito, S., Bartlett, B., & Fuchs, M. (2013). Genetic variability, evolution, and biological effects of grapevine fanleaf virus satellite RNAs. Phytopathology, 103(11), 1180-1187.
14	Hajizadeh, M., Navarro, B., Bashir, N. S., Torchetti, E. M., & Di Serio, F. (2012). Development and validation of a multiplex RT-PCR method for the simultaneous detection of five grapevine viroids. Journal of virological methods, 179(1), 62-69.
15	Jiang, D., Zhang, Z., Wu, Z., Guo, R., Wang, H., Fan, P., & Li, S. (2009). Molecular characterization of grapevine yellow speckle viroid-2 (GYSVd-2). Virus genes, 38(3), 515-520.
16	Osman, F., & Rowhani, A. (2006). Application of a spotting sample preparation technique for the detection of pathogens in woody plants by RT-PCR and real-time PCR (TaqMan). Journal of virological methods, 133(2), 130-136.
17	Padilla, C. V., Cretazzo, E., Hita, I., Lopez, N., Padilla, V., & Velasco, L. (2010). First report of Grapevine leafroll-associated virus 5 in Spain. Plant disease, 94(12), 1507-1507.
18	Porotikova, E., Terehova, U., Volodin, V., Yurchenko, E., & Vinogradova, S. (2021). Distribution and Genetic Diversity of Grapevine Viruses in Russia. Plants, 10(6), 1080.
19	Rowhani A., Zhang Y.P., Golino D.A., Uyemoto J.K., 2000. Isolation and partial characterization of two new viruses from grapevine. In: Proceedings 13th Meeting ICVG, Ade- laide 2000, 82.
20	Sano, T., Mimura, R., & Ohshima, K. (2001). Phylogenetic analysis of hop and grapevine isolates of hop stunt viroid supports a grapevine origin for hop stunt disease. Virus Genes, 22(1), 53-59.
21	Vinogradova, 2021, in press.
22	Wetzel, T., Bassler, A., Amren, M. A. W., & Krczal, G. (2006). A RT/PCR-partial restriction enzymatic mapping (PREM) method for the molecular characterisation of the large satellite RNAs of Arabis mosaic virus isolates. Journal of virological methods, 132(1-2), 97-103.

## Sheet: Table S3
Supplementary materials, Navrotskaya et al., 2021 High-Throughput Sequencing of Small RNAs for Diagnostics of Grapevine Viruses and Viroids in Russia
Supplementary Table S3
Primers used for phylogenetic analysis
Pathogen's name		Primer Name	Primer Sequence (5'-3')	Funcion of the amplified region	PCR-product, bp	Reference
Virus	GLRaV-1	GLR1cp_13346	TTTACGGTATCGTTTTATTATG	coat protein (cp) gene	669	Porotikova et al., 2021
		GLR1cp_14015	CRAYGGCACCCTTAACYTTC
	GLRaV-2	GLR2CP1	ATGGAGTTGATGTCCGAC	coat protein (cp) gene	597	Abou Ghanem-Sabanadzovic et al., 2000
		GLR2CP2	TACATAACTTCCCTTCTACC
	GLRaV-3	GLR3cp_13836F	TGAGTGRACGCGATGGCRTT	coat protein (cp) gene	965	Porotikova et al., 2021
		GLR3cp_14800R	TTRTGTAAGGTGTTRTCGG
	GLRaV-4	LR-5-HYF	TGGGATGAAYAARTTCAATGC	hsp70 gene	250	Padilla et al., 2010
		LR-5-HYR	TGAAATTCCTCATRTARGAGC
	GFkV	GFkV 6351F	CTCTCCGCCTCGTCTGATGA	coat protein (cp) gene	714	Naidu, Mekuria, 2010
		GFkV 7064R	TCGGTTCATGACGAGGGAGT
	GVT	GVT_7632F	GTGGTCCTCGTTAGGTGCAG	coat protein (cp) gene	903	Glasa et al., 2018
		GVT_8534R	GTGGTCCTCGTTAGGTGCAG
	GPGV	GPGcp_6510_F	GGTTAAGTCTAAATCTGGYTR	coat protein (cp) gene	707	Vinogradova, 2021
		GPGcp_7216_R	CGTAGACATTAAGAAGTTACG	3'UTR
		GPGV_6609	GAGATCAACAGTCAGGAGAG	coat protein (cp) gene	608	Glasa et al., 2014
	GRVFV	GRVFV6155-F	ACTCWCYATCCCCTTCCAGT	polyprotein gene	413	Reynard et al., 2017 (Modified)
		GRVFV6567-R	CTGACCATGCCACGAATCA
	GRSPaV	RSPaV_7770F	ATGGCRAGTCARRTTGG	coat protein (cp) gene	750	Dmitrenko et al., 2016
		RScpR	CCGCTTKCCTTCAGCCATAG
		RSPaV_7793F	CCYGGYGAATCAAATGARGC		730	Porotikova et al., 2021
	GVA	Ah_587F	GACAAATGGCACACTACG	coat protein (cp) gene	600	Minafra, Hadidi 1994
		GVA_600R	ATMTCGACAGCCTGCTCKCC			Poroticova et al., 2016
	GSyV-1	GVQcp_F	TCCCAGCTTCAGGGTGAATT	coat protein (cp) gene	720	Engel et al., 2010
		GVQcp_R	GCATTGCTGCGCATTGGAGG
	GFLV	GFLV_M2_F	YTRGATTTTAGGCTCAATGG	polyprotein gene	855	Wetzel et al., 2002
		GFLV_M4_F	GTDATCCACTTYTCATACTG
	RBDV	RBDV_RNA2F_986	GTTGTTGAATGAGGCGAATTC	movement protein (mp) gene	1245	Czotter N., MolnarJ., et al. 2018
		RBDV_RNA2R_2229	GGTTTGCTCAGCAAACAACGGC	coat protein (cp) gene
Viroid	GYSVd-1	GYSVd-1-mF	CAAAGCCCTTTTTCTTTCAACTGAG	partial genome	249	Hajizadeh M. et al., 2012
		GYSVd-1-mR2	CCCAGAGCAGCGTGGYYY
	GYSVd-2	GYSVd-2-P1	ACTAGTACTTTCTTCTATCTCCGAAGC	complete genome	375	Jiang et al., 2009
		GYSVd-2P2	ACTAGTCCGAGGACCTTTTCTAGCGCTC
	HSVd	HSVd-78P	AACCCGGGGCAACTCTTCTC	complete genome	298–307	Sano et al., 2001
		HSVd-83V	AACCCGGGGCTCCTTTCTCA
	AGVd	AGVd-mF	GTCCTCAGGAGAGCACCGG	partial genome	195	Hajizadeh M. et al., 2012
		AGVd-mR	GAAAACTGGTTGGGACCGCTG
	References:
1	Abou Ghanem-Sabanadzovic, N., Sabanadzovic, S., Castellano, M. A., Boscia, D., & Martelli, G. P. (2000). Properties of a new isolate of grapevine leafroll-associated virus 2. Vitis, 39(3), 119-121.
2	Czotter, N., Molnar, J., Szabó, E., Demian, E., Kontra, L., Baksa, I., ... & Varallyay, E. (2018). NGS of virus-derived small RNAs as a diagnostic method used to determine viromes of Hungarian vineyards. Frontiers in Microbiology, 9, 122.
3	Dmitrenko, U. D., Porotikova, E. V., Gorislavets, S. M., Risovannaya, V. I., Volkov, Y. A., Stranishevskaya, E. P., ... & Vinogradova, S. V. (2016). First Report of Grapevine rupestris stem pitting-associated virus in Russia. Plant Disease, 100(12), 2542-2542.
4	Engel, E. A., Rivera, P. A., & Valenzuela, P. D. T. (2010). First report of Grapevine Syrah virus-1 in Chilean grapevines. Plant Disease, 94(5), 633-633.
5	Glasa, M., Predajňa, L., Komínek, P., Nagyová, A., Candresse, T., & Olmos, A. (2014). Molecular characterization of divergent grapevine Pinot gris virus isolates and their detection in Slovak and Czech grapevines. Archives of virology, 159(8), 2103-2107.
6	Glasa, M., Predajňa, L., Sihelská, N., Šoltys, K., Ruiz-García, A. B., Olmos, A., ... & Sabanadzovic, S. (2018). Grapevine virus T is relatively widespread in Slovakia and Czech Republic and genetically diverse. Virus genes, 54(5), 737-741.
7	Hajizadeh, M., Navarro, B., Bashir, N. S., Torchetti, E. M., & Di Serio, F. (2012). Development and validation of a multiplex RT-PCR method for the simultaneous detection of five grapevine viroids. Journal of virological methods, 179(1), 62-69.
8	Jiang, D., Zhang, Z., Wu, Z., Guo, R., Wang, H., Fan, P., & Li, S. (2009). Molecular characterization of grapevine yellow speckle viroid-2 (GYSVd-2). Virus genes, 38(3), 515-520.
9	Minafra, A., & Hadidi, A. (1994). Sensitive detection of grapevine virus A, B, or leafroll-associated III from viruliferous mealybugs and infected tissue by cDNA amplification. Journal of virological methods, 47(1-2), 175-187.
10	Naidu, R. A., & Mekuria, T. A. (2010). First report of grapevine fleck virus from Washington vineyards. Plant disease, 94(6), 784-784.
11	Padilla, C. V., Cretazzo, E., Hita, I., Lopez, N., Padilla, V., & Velasco, L. (2010). First report of Grapevine leafroll-associated virus 5 in Spain. Plant disease, 94(12), 1507-1507.
12	Porotikova, E. V., Dmitrenko, U. D., Volodin, V. A., Volkov, Y. A., Gorislavets, S. M., Stranishevskaya, E. P., ... & Vinogradova, S. V. (2016). First report of Grapevine virus A in Russian grapevines. Plant Disease, 100(12), 2541.
13	Porotikova, E., Terehova, U., Volodin, V., Yurchenko, E., & Vinogradova, S. (2021). Distribution and Genetic Diversity of Grapevine Viruses in Russia. Plants, 10(6), 1080.
14	Reynard, J. S., Brodard, J., Dubuis, N., Yobregat, O., Kominek, P., Schumpp, O., & Schaerer, S. (2017). First report of Grapevine rupestris vein feathering virus in Swiss Grapevines. Plant Disease, 101(6), 1062.
15	Sano, T., Mimura, R., & Ohshima, K. (2001). Phylogenetic analysis of hop and grapevine isolates of hop stunt viroid supports a grapevine origin for hop stunt disease. Virus Genes, 22(1), 53-59.
16	Vinogradova, 2021, in press
17	Wetzel, T., Jardak, R., Meunier, L., Ghorbel, A., Reustle, G.M., Krczal, G., 2002. Simultaneous RT/PCR detection and differentiation of arabis mosaic and grapevine fanleaf nepoviruses in grapevines with a single pair of primers. J. Virol. Meth. 101, 63–69.

## Sheet: Table S4
Supplementary materials, Navrotskaya et al., 2021 High-Throughput Sequencing of Small RNAs for Diagnostics of Grapevine Viruses and Viroids in Russia
Supplementary Table S4
Amplified sequences of viruses uploaded into GenBank with their identifier. Validation results are grey highlighted
Virus	Isolate	GenBank identifier	Reference genome			Blastn search
			Posistion on reference genome	Genome used as a reference	Pairwise identity, %	Closest genome	Pairwise identity, %	Country
GLRaV-1	V1609	MZ031984	13046-13985	NC_016509	89.6	JN861003.1	95.5	Poland
	V1512a	MZ065366	13046-14012	NC_016509	93.2	KY827404.1	95.3	Czech Republic
	V393a	MZ065367	13046-13715	NC_016509	92.8	KY827404.1	98.5	Czech Republic
	V471	MW810492	13182-14015	NC_016509	94.4	KY827404.1	98.2	Czech Republic
	Vv1609a	MZ065368	13816-13959	NC_016509	91.7	MK955852.1	100	USA
GLRaV-2	V1610b	MZ065369	14579-15175	NC_007448	87.9	KM012067.1	99.7	Portugal
	Vv1615b	MZ605444	14579-15029	NC_007448	85.9	MH074870.1	100	Russia
GLRaV-3	V1609c	MZ065370	13303-14142	NC_004667	99.2	LR215340.1	100	Greece
	V628c	MZ065371	13307-14142	NC_004667	99	LR215340.1	99.8	Greece
	V429c	MZ065372	13269-14142	NC_004667	99.4	MH814491.1	100	Canada
	V263c	MZ065373	13292-14142	NC_004667	99.1	LR215340.1	99.8	Greece
	Vv1609c	MZ065374	13383-13714	NC_004667	99.4	LR215340.1	100	Greece
GLRaV-4	Vv650d	MZ065375	9146-9398	NC_016416	73.1	MN175643.1	96.4	USA
GFkV	V1610k	MZ091480	6392-7061	NC_003347	94.6	JN022610.1	97.2	Brazil
	V347k	MZ091481	6401-7061	NC_003347	94.7	JN022610.1	95.3	Brazil
	V622k	MZ091482	6399-7061	NC_003347	94.6	JN022610.1	97.1	Brazil
	V377k	MZ091483	6392-7061	NC_003347	96.3	MN716779.1	96.6	USA
	V429k	MZ091484	6401-7061	NC_003347	97.9	KX828706.1	98.8	Brazil
	V301k	MZ091485	6389-7061	NC_003347	97.5	KX828706.1	98.4	Brazil
	V635k	MZ091486	6389-7061	NC_003347	97.9	KX828706.1	99.1	Brazil
	V384k	MZ091487	6397-7058	NC_003347	94.3	JN022610.1	96.8	Brazil
	V393k	MZ091488	6395-7061	NC_003347	97.7	KX828706.1	98.4	Brazil
	V476k	MZ091489	6367-7061	NC_003347	94.9	AJ309022.1	95	Italy
	V1515k	MZ091490	6401-7061	NC_003347	94.5	JN022610.1	97.1	Brazil
	V337k	MZ091491	6391-7061	NC_003347	97.2	KX828706.1	98.4	Brazil
	V508k	MZ091492	6393-7061	NC_003347	97.3	KX828706.1	98.5	Brazil
	V449k	MZ091493	6404-7012	NC_003347	96.1	JN022610.1	98	Brazil
	V351k	MZ091494	6386-7061	NC_003347	98	KX828706.1	99.1	Brazil
	V267k	MZ091495	6387-7061	NC_003347	97.6	KX828706.1	99	Brazil
	V370k	MZ091496	6387-7061	NC_003347	95.4	AJ309022.1	95.4	Italy
	Vv476k	MZ091497	6550-6805	NC_003347	95.3	JN133958.1	96.9	Slovakia
GVT	V1615g	MZ209411	7631-8501	NC_035203	80.9	MH388491.1	95.5	Italy
	V351g	MZ229615	7642-8535	NC_035203	85.2	MH158659.1	94.2	China
	V622g	MZ229616	7633-8496	NC_035203	83.2	LC617948.1	97.5	Japan
	V654g	MZ229617	7638-8497	NC_035203	83.4	MN613585.1	96.6	Georgia
	V1524g	MZ229618	7635-8494	NC_035203	83.7	MN613585.1	96.6	Georgia
	V269g	MZ229619	7644-8500	NC_035203	87.6	MH674171.1	93	France
	V301g	MZ229620	7633-8514	NC_035203	87	MG001925.1	97.3	Croatia
	V337g	MZ229621	7634-8517	NC_035203	86.2	MH158659.1	93.7	China
	V635g	MZ229622	7631-8526	NC_035203	84.7	MH158659.1	93.7	China
	V347g	MZ229623	7642-8499	NC_035203	80.8	MH388491.1	95.7	Italy
	V471g	MZ229624	7695-8483	NC_035203	87.7	MH674171.1	93.5	France
	Vv1515g	MZ229625	8120-8425	NC_035204	90.8	MH674179.1	97.4	France
GPGV	V1609i	MZ464054	6509-7239	NC_015782	96.7	MN458430.1	99	France
	V351i	MZ476948	6509-7236	NC_015782	97.4	MN458427.1	99.6	France
	V654i	MZ476949	6608-7241	NC_015782	97.5	BK011064.1	99.2	Italy
	V429i	MZ476950	6575-7142	NC_015782	97.7	KU949328.1	98.8	Slovakia
	V1524i	MZ476951	6608-7241	NC_015782	95.7	KX522755.1	98.6	Germany
	V1533i	MZ476952	6608-7235	NC_015782	96.5	MK514528.1	99.2	USA
	V301i	MZ476953	6509-7239	NC_015782	97.3	MN458423.1	99.3	France
	V508i	MZ476954	6543-7240	NC_015782	96.4	BK011064.1	98.9	Italy
	V635i	MZ476955	6544-7234	NC_015782	98.1	BK011073.1	98.6	China
	V393i	MZ476956	6644-7199	NC_015782	96.9	BK011101.1	99.1	Italy
	V409i	MZ476957	6509-7236	NC_015782	96.4	BK011101.1	98.8	Italy
	V449i	MZ476958	6543-7238	NC_015782	98.3	BK011073.1	99.3	China
	V628i	MZ476959	6513-7196	NC_015782	96.9	BK011064.1	99	Italy
	V289i	MZ476960	6499-7200	NC_015782	97.2	BK011064.1	99	Italy
	V337i	MZ476961	6575-7143	NC_015782	97.5	KU949328.1	99	Slovakia
	V377i	MZ476962	6511-7197	NC_015782	96.4	BK011090.1	98.5	Italy
	V269i	MZ476963	6509-7163	NC_015782	97.1	BK011064.1	98.3	Italy
	V384i	MZ476964	6542-7211	NC_015782	96.7	KX522755.1	99.1	Germany
	V263i	MZ476965	6545-7239	NC_015782	96.7	KF134123.1	99.4	Slovakia
	Vv269i	MZ476966	6621-7021	NC_015782	97	MF538642.1	99.5	Hungary
GRVFV	V1610j	MZ146886	6155-6599	NC_034205	90.2	MH544695.1	98.4	Slovakia
	V622j	MZ146887	6154-6565	NC_034205	87.6	MT084812.1	91.8	Australia
	V1515j	MZ146888	6155-6553	NC_034205	86.1	MH544699.1	91.2	Slovakia
	V429j	MZ146898	6221-6599	NC_034205	91.7	MH544690.1	94.7	Slovakia
	V301j	MZ146889	6155-6563	NC_034205	89.7	KX828705.1	91.6	Brazil
	V337j	MZ146890	6155-6570	NC_034205	84.2	MH544699.1	91.4	Slovakia
	V370j	MZ146891	6153-6599	NC_034205	88.1	MH131693.1	97.8	Germany
	V449j	MZ146892	6178-6599	NC_034205	91.8	MH544690.1	94.5	Slovakia
	Vv429j	MZ579707	6223-6505	NC_034205	91.7	MH544690.1	91.8	Slovakia
GRSPaV	V1612h	MZ146893	7771-8468	NC_001948	82.1	MG938334.1	99.1	France
	V263h	MZ146894	7771-8471	NC_001948	81.9	KT008376.1	96.3	Brazil
	V351h	MZ146895	7771-8470	NC_001948	82.7	KX274274.1	98.6	Slovakia
	V622h	MZ146896	7771-8482	NC_001948	98.5	KT008370.1	98.9	Brazil
	V1512h	MZ146897	7792-8426	NC_001948	82	MG938334.1	98.6	France
	V289h	MZ158160	7771-8461	NC_001948	82	MG938334.1	99.42	France
	V377h	MZ158161	7771-8425	NC_001948	89.4	MG050375.1	96.5	South Africa
	V269h	MZ158162	7771-8473	NC_001948	83.9	LT855235.1	98.6	Tunisia
	V301h	MZ158163	7773-8469	NC_001948	86.2	MK804767.1	94.3	Brazil
	V337h	MZ158164	7771-8471	NC_001948	82.9	DQ364990.1	98.4	Italy
	V508h	MZ158165	7805-8439	NC_001948	83.3	KF731977.1	99.1	China
	V635h	MZ158166	7796-8479	NC_001948	84	LT855243.1	96.9	Tunisia
	V384h	MZ158167	7771-8436	NC_001948	83.2	KJ634617.1	98.7	China
	V410h	MZ158168	7792-8471	NC_001948	90.6	MG050406.1	96	South Africa
	V476h	MZ158169	7771-8441	NC_001948	82.2	KX274274.1	99.1	Slovakia
	V1533h	MZ158170	7771-8447	NC_001948	88.2	MK804767.1	94.5	Brazil
	V1524h	MZ158171	7771-8478	NC_001948	85.6	MK804767.1	93.4	Brazil
	V449h	MZ158172	7793-8443	NC_001948	82.3	MN716766.1	98.6	USA
	V429h	MZ158173	7793-8478	NC_001948	91.7	KX035006.1	98.5	France
	V588h	MZ158174	7808-8470	NC_001948	90.8	MG050290.1	99.4	South Africa
	V370h	MZ158175	7771-8470	NC_001948	83.1	MK804767.1	97.6	Brazil
	V393h	MZ158176	7795-8470	NC_001948	85.2	FJ943340.1	98.8	USA
	Vv377h	MZ158177	8284-8470	NC_001948	93.3	LT855229.1	95.2	Italy
GVA	V1609f	MZ158178	6414-6958	NC_003604	87.7	KF013780.1	91.9	USA
	V301f	MZ158179	6414-6965	NC_003604	88.8	JF754577.1	93.3	China
	V449f	MZ158180	6414-7010	NC_003604	88.2	AB039841.1	94.4	Japan
	V471f	MZ158181	6414-7001	NC_003604	88	AF007415.2	97.1	Israel
	Vv301f	MZ158182	6543-6862	NC_003604	87.2	JF754577.1	91.6	China
GSyV-1	V628L	MZ268015	5716-6409	NC_012484	92.5	KX130754.1	92.9	Brazil
	V650L	MZ436819	5723-6409	NC_012484	93	KT005398.1	98.3	Hungary
	V429L	MZ436820	5719-6409	NC_012484	93.2	GU566024.1	96.1	Chile
	V1533L	MZ436821	5724-6409	NC_012484	98.3	KX130754.1	98.5	Brazil
	V269L	MZ436822	5687-6409	NC_012484	93.2	GU566024.1	96.4	Chile
	V301L	MZ436823	5721-6409	NC_012484	95.2	KT037017.1	96.8	Brazil
	V370L	MZ436824	5720-6417	NC_012484	92.4	KX130754.1	92.4	Brazil
	V409L	MZ436825	5722-6409	NC_012484	92.6	KT005404.1	98.4	Hungary
	V449L	MZ436826	5722-6409	NC_012484	91.4	MN716774.1	98.7	USA
	V263L	MZ436827	5741-6295	NC_012484	92.6	KT005398.1	98.4	Hungary
	V377L	MZ436828	5688-6231	NC_012484	94	FJ977044.1	94.1	USA
	Vv1612L	MZ436829	5922-6295	NC_012484	91.7	GU372365.1	98.9	USA
GFLV	V377e	MZ196509	1327-2146	NC_003623	94.1	GU972577.1	92	USA
	V301e	MZ196510	1373-2126	NC_003623	92	MG418840.1	92.2	France
	V337e	MZ196511	1373-2123	NC_003623	92.1	DQ362929.1	93.2	Italy
	V269e	MZ196512	1355-2127	NC_003623	91.8	MG418840.1	92	France
	Vv337e	MZ196513	2479-2961	NC_003623	90.3	DQ526452.1	93.7	Chile
RBDV	V476m	MZ457017	1039-2208	NC_003740	95.4	KY417873.1	99.1	Slovenia
	Vv476m	MZ457018	217-1157	NC_003739	94.4	MH802009.1	98.8	Canada
GYSVd-1	V628n	MZ835424	partial genome	NC_001920	88.9	KU880716.1	100	Brazil
	V650n	MZ835425	partial genome	NC_001920	88.9	KU880716.1	99.2	Brazil
	V377n	MZ835426	partial genome	NC_001920	88.9	KU880716.1	99.6	Brazil
	V588n	MZ835427	partial genome	NC_001920	95.5	KU880712.1	100	Brazil
	V1533n	MZ835428	partial genome	NC_001920	88.9	KU880716.1	99.6	Brazil
	V301n	MZ835429	partial genome	NC_001920	99.4	KU880713.1	99.5	Brazil
	V508n	MZ835430	partial genome	NC_001920	88.9	KU880716.1	99.6	Brazil
	V635n	MZ835431	partial genome	NC_001920	87.7	KU880716.1	99.2	Brazil
	V384n	MZ835432	partial genome	NC_001920	88.9	KU880716.1	99.6	Brazil
	V476n	MZ835433	partial genome	NC_001920	87.7	KU880716.1	98.3	Brazil
	V1619n	MZ196514	1-261	NC_001920	88.9	KU880716.1	99.6	Brazil
GYSVd-2	V1620o	MZ665998	partial genome	NC_003612	98.3	HM211853.1	98.5	China
	V622o	MZ665999	partial genome	NC_003612	99.5	HM211853.1	98.8	China
	V267o	MZ665997	complete genome	NC_003612	96.2	HM211853.1	97.4	China
	V302o	MZ803184	partial genome	NC_003612	98.1	FJ490173.1	99.5	China
	V263o	MZ196515	complete genome	NC_003612	99.4	LR735994.1	99.7	Greece
HSVd	V263q	MZ825532	complete genome	NC_001351	95.7	MW357720.1	100	Brazil
	V351q	MZ825533	complete genome	NC_001351	95.7	MW357720.1	100	Brazil
	V628q	MZ825534	partial genome	NC_001351	95.3	MF979532.1	98.1	Croatia
	V650q	MZ825535	partial genome	NC_001351	94.4	KR909028.1	98.1	China
	V289q	MZ825536	partial genome	NC_001351	95.6	MF979532.1	99.6	Croatia
	V377q	MZ825537	partial genome	NC_001351	95.6	MF979532.1	100	Croatia
	V429q	MZ825538	partial genome	NC_001351	95.6	HM357802.1	99.6	China
	V588q	MZ825539	partial genome	NC_001351	95.8	HM357802.1	99.7	China
	V1533q	MZ825540	complete genome	NC_001351	95.7	MW357720.1	100	Brazil
	V269q	MZ825541	partial genome	NC_001351	94.7	GU327606.1	100	USA
	V301q	MZ825542	complete genome	NC_001351	95.7	MW357720.1	100	Brazil
	V337q	MZ825543	partial genome	NC_001351	94.7	GU327606.1	98.8	USA
	V508q	MZ825544	complete genome	NC_001351	95.7	MW357720.1	100	Brazil
	V635q	MZ825545	partial genome	NC_001351	94.4	KR909028.1	96.9	China
	V384q	MZ825546	partial genome	NC_001351	95.4	MF979532.1	99.1	Croatia
	V393q	MZ825547	partial genome	NC_001351	95.4	MF979532.1	99.5	Croatia
	V409q	MZ825548	partial genome	NC_001351	95	MF979532.1	99.1	Croatia
	V476q	MZ825549	complete genome	NC_001351	94.1	KF007322.1	100	Chile
	V1609q	MZ196517	complete genome	NC_001351	91.4	X06873.1	99.7	Germany
AGVd	V263p	MZ803185	partial genome	NC_003553	93.3	KJ019303.1	93.8	India
	V1615p	MZ196516	114-304	NC_003553	99	FJ746744.1	99.5	China

## Sheet: Table S5
Supplementary materials, Navrotskaya et al., 2021 High-Throughput Sequencing of Small RNAs for Diagnostics of Grapevine Viruses and Viroids in Russia
Supplementary Table S5
Initial statistics of sequense results. % - the number of reads remaining after operation from their initial number
Library code	Sequenced reads	Avg. length	With Vitis				Vitis free
			redundant		non-redundant		redundant		non-redundant
			seq number	%	seq number	%	seq number	%	seq number	%
Zs85-SV2_S19	20596201	50	19924539	96.7389	2842969	13.8034	15979898	77.5866	2767585	13.4374
Lib-03_S20	15680893	50	15241951	97.2008	1803642	11.5022	9041642	57.6602	1752368	11.1752
Lib-04_S21	14767207	50	14330011	97.0394	1758500	11.9081	8691058	58.8538	1728452	11.7047
Lib-05_S22	15308524	50	14641469	95.6426	2038196	13.3141	8281301	54.096	1992814	13.0177
Lib-06_S23	20605284	50	19976101	96.9465	2371134	11.5074	12492840	60.6293	2294316	11.1346
Library code	With Vitis												Vitis free
	SPAdes						Geneious						SPAdes						Geneious
	de novo kmer15		de novo kmer17		de novo kmer19		de novo kmer15		de novo kmer17		de novo kmer19		de novo kmer15		de novo kmer17		de novo kmer19		de novo kmer15		de novo kmer17		de novo kmer19
	Contig number	N50	Contig number	N50	Contig number	N50	Contig number	N50	Contig number	N50	Contig number	N50	Contig number	N50	Contig number	N50	Contig number	N50	Contig number	N50	Contig number	N50	Contig number	N50
Zs85-SV2_S19	1128	161	671	167	279	178	260560	57	244303	56	227009	56	1094	155	645	155	279	169	259103	57	244431	56	226100	56
Lib-03_S20	532	161	295	174	166	209	154578	57	149082	56	139136	56	512	159	276	175	156	195	154389	56	148935	56	138569	56
Lib-04_S21	477	168	258	172	158	187	154992	57	149069	56	150142	56	481	169	254	172	157	183	155079	57	136580	57	149957	56
Lib-05_S22	623	158	386	167	188	227	177393	56	168530	56	169314	56	588	149	391	167	189	224	177250	56	168603	56	169061	56
Lib-06_S23	877	157	483	167	361	179	177786	57	163872	56	149147	56	849	151	458	168	354	178	165341	57	163204	56	156858	56

## Sheet: Table S6 
Supplementary materials, Navrotskaya et al., 2021 High-Throughput Sequencing of Small RNAs for Diagnostics of Grapevine Viruses and Viroids in Russia
Supplementary Table S6
Supplementary of bioinformatics analysis
Summary of the two bioinformatic approaches (contig blastn and read mapping) used in the study for the small RNA HTS analysis according to libraries and viruses. Result of the contig blastn are the numbers of the virus specific contigs wich could be built using 15-, 17-, 19kmer settings (E-Value-5). Presence of any contigs is detected as a virus hit and highlighted with green color. Result of the…
Library code	Analysis				Validated viruses																					Non validated viruses
					Viruses																Viroids
					Closteroviridae				Tymovidae			Betaflexiviridae				Idaeovirus		Secoviridae								Secoviridae					Tymoviridae	Closteroviridae
					GLRaV-1 (NC_016509)	GLRaV-2 (NC_007448)	GLRaV-3 (NC_004667)	GLRaV-4 (NC_016416)	GFkV (NC_003347)	GRVFV (NC_034205)	GSyV-1 (NC_012484)	GVT (NC_035203)	GPGV (NC_015782)	RSPaV (NC_001948)	GVA (NC_003604)	RBDV RNA2 (NC_003740)	RBDV RNA1 (NC_0033739)	GFLV RNA1 (NC_003615)	GFLV RNA2 (NC_003623) (F13)	GFLVsat (NC_003203)	GYSVd-1 (NC_001920)	GYSVd-2 (NC_003612)	HSVd (NC_001351)	AGVd (NC_003553)		ArMV RNA2 (NC_006056)	ArMV RNA1 (NC_006057)	ArMV Sat (NC_003523)	GDeV RNA2 (NC_017938)	GDeV RNA1 (NC_017939)	GRGV (NC_030693)	GLRaV-2RG (=GRSLaV) NC_004724
Zs85-SV2_S19	With Vitis	contig blastn (Geneious)		kmer 15	68	142	903	0	68	7	11	0	126	50	5	0	0	0	0	0	67	38	28	26		0	0	0	0	0	0	7
				kmer 17	46	116	793	0	65	5	7	0	97	33	8	0	0	0	0	0	66	32	27	21		0	0	0	0	0	0	9
				kmer 19	37	91	735	0	50	2	4	0	67	28	6	0	0	0	0	0	63	38	22	16		0	0	0	0	0	0	3
		contig blastn (SPAdes)		kmer 15	15	103	109	0	2	0	0	0	15	9	7	0	0	0	0	0	3	1	1	3		0	0	0	0	0	0	3
				kmer 17	2	56	68	0	1	0	0	0	9	3	2	0	0	0	0	0	3	5	2	4		0	0	0	0	0	0	4
				kmer 19	1	9	14	0	0	0	0	0	0	1	0	0	0	0	0	0	2	3	2	2		0	0	0	0	0	0	1
		Custom Sensitivity*	read	non-redundant	3067	82	5226	0	42	3361	20	0	64	3521	5	0	0	0	0	0	71	38	58	34		5	0	0	0	0	0	3862
				redundant	666352	102853	673366	0	11171	295864	50	0	37898	634006	18	0	0	0	0	0	382	308	496	134		7047	1119	0	0	0	0	463694
			coverage, %	non-redundant	2.2	7.4	26.9	-	6.4	1.8	2.6	-	16.6	7.4	1.5	-	-	-	-	-	86.3	70.5	80.5	71		0.6	-	-	-	-	-	0.8
				redundant	3.2	15.7	53.8	-	10	1.8	4.4	-	31	11.3	3.5	-	-	-	-	-	97	96.7	94	92.1		1.5	0.6	0	-	-	-	1.7
	Vitis free reads	contig blastn (Geneious)		kmer 15	63	152	902	0	62	6	12	0	123	50	8	0	0	0	0	0	73	40	25	25		0	0	0	0	0	0	7
				kmer 17	45	121	801	0	63	6	7	0	90	35	8	0	0	0	0	0	63	32	25	22		0	0	0	0	0	0	7
				kmer 19	34	89	753	0	49	2	4	0	72	27	4	0	0	0	0	0	69	35	23	16		0	0	0	0	0	0	5
		contig blastn (SPAdes)		kmer 15	14	101	108	0	1	0	0	0	18	9	6	0	0	0	0	0	2	1	1	3		0	0	0	0	0	0	3
				kmer 17	2	58	64	0	1	0	0	0	9	3	0	0	0	0	0	0	2	3	2	4		0	0	0	0	0	0	4
				kmer 19	1	9	15	0	0	0	0	0	0	1	0	0	0	0	0	0	2	3	2	2		0	0	0	0	0	0	1
		Custom Sensitivity	read	non-redundant	1059	82	2113	0	42	1134	21	0	64	1173	5	0	0	0	0	0	71	38	58	34		5	0	0	0	0	0	1129
				redundant	77694	58173	88303	0	10757	80704	50	0	31873	79278	18	0	0	0	0	0	382	308	496	134		5201	717	0	0	0	0	90573
			coverage, %	non-redundant	2.2	7.4	26.9	-	6.4	1.8	2.6	-	16.6	7.4	1.5	-	-	-	-	-	86.3	70.5	80.5	71.3		0.6	-	-	-	-	-	0.8
				redundant	3.2	15.7	53.8	-	10	1.8	4.4	-	31	11.3	3.5	-	-	-	-	-	97	96.7	94	92.1		1.6	0.6	-	-	-	-	1.7
	Sanger sequencing				S	S	S	-	S	S	S	S	S	S	S	-		-			S	S	S	S		-	-	-	-	-	-	-
Lib-03_S20	With Vitis reads	contig blastn (Geneious)		kmer 15	11	0	221	2	231	4	3	0	45	23	0	0	0	0	0	0	7	22	18	7		0	0	0	0	0	0	0
				kmer 17	10	0	194	1	204	4	3	0	42	16	0	0	0	0	0	0	11	19	16	5		0	0	0	0	0	0	0
				kmer 19	5	0	168	1	205	4	2	0	34	10	0	0	0	0	0	0	10	15	13	2		0	0	0	0	0	0	0
		contig blastn (SPAdes)		kmer 15	2	0	14	0	30	1	0	0	2	0	0	0	0	0	0	0	1	1	1	0		0	0	0	0	0	0	0
				kmer 17	0	0	3	0	14	0	0	0	1	0	0	0	0	0	0	0	2	2	2	0		0	0	0	0	0	0	0
				kmer 19	0	0	0	0	1	0	0	0	0	0	0	0	0	0	0	0	1	1	1	0		0	0	0	0	0	0	0
		Custom Sensitivity	read	non-redundant	5	5	7282	0	81	5558	6698	7787	30	7162	0	0	0	0	0	0	14	35	39	3		7	0	0	0	0	3137	0
				redundant	8	8	897818	1	15147	1272491	3420852	961212	56	3193085	0	0	0	0	0	0	97	143	314	13		3947	0	0	0	0	890656	0
			coverage, %	non-redundant	0.5	0.1	5.2	-	8.4	1.4	0.9	1.7	8.2	4.1	-	-	-	-	-	-	42.1	57.6	61.6	15.2		0.6	-	-	-	-	0.6	-
				redundant	0.6	0.1	8.9	0.2	19	1.9	1.1	1.9	14.1	7.6	-	-	-	-	-	-	58.5	74.7	89.7	37.1		1.5	-	-	-	-	0.6	-
	Vitis free reads	contig blastn (Geneious)		kmer 15	10	0	207	2	227	4	2	0	45	23	0	0	0	0	0	0	10	22	24	8		0	0	0	0	0	0	0
				kmer 17	10	0	189	1	203	3	2	0	43	17	0	0	0	0	0	0	11	19	15	4		0	0	0	0	0	0	0
				kmer 19	4	0	166	1	205	5	2	0	31	11	0	0	0	0	0	0	8	13	13	3		0	0	0	0	0	0	0
		contig blastn (SPAdes)		kmer 15	2	0	14	0	26	1	0	0	2	0	0	0	0	0	0	0	1	1	1	0		0	0	0	0	0	0	0
				kmer 17	0	0	2	0	13	0	0	0	1	0	0	0	0	0	0	0	2	2	2	0		0	0	0	0	0	0	0
				kmer 19	0	0	0	0	1	0	0	0	0	0	0	0	0	0	0	0	1	1	1	0		0	0	0	0	0	0	0
		Custom Sensitivity	read	non-redundant	5	5	2364	0	81	2063	1930	2620	30	1943	0	0	0	0	0	0	14	35	39	3		7	0	0	0	0	904	0
				redundant	8	8	112706	1	6014	123703	160621	117915	56	115197	0	0	0	0	0	0	97	143	314	13		8870	0	0	0	0	106565	0
			coverage, %	non-redundant	0.5	0.1	5.2	-	8.4	1.4	0.9	1.7	8.2	4	-	-	-	-	-	-	42.1	57.6	61.6	15.2		0.5	-	-	-	-	0.6	-
				redundant	0.6	0.2	8.9	0.2	18.5	1.9	1.2	1.9	14.1	7.5	-	-	-	-	-	-	58.5	74.7	89.7	37.1		1.6	-	-	-	-	0.6	-
	Sanger sequencing				S	-	S	S	S	S	S	S	S	S	-	-		-			S	S	S	S		-	-	-	-	-	-	-
Lib-04_S21	With Vitis reads	contig blastn (Geneious)		kmer 15	0	0	110	0	42	6	8	0	66	23	0	0	0	2	1	0	14	1	22	0		0	0	0	0	1	0	0
				kmer 17	0	0	99	0	41	3	4	0	51	18	0	0	0	1	0	0	9	0	19	0		0	0	0	0	1	0	0
				kmer 19	0	0	83	0	36	4	5	0	33	13	0	0	0	1	1	0	11	1	13	0		0	0	0	0	0	1	0
		contig blastn (SPAdes)		kmer 15	0	0	0	0	2	0	0	0	2	2	0	0	0	0	0	0	3	0	1	0		0	0	0	0	0	0	0
				kmer 17	0	0	0	0	1	0	0	0	1	0	0	0	0	0	0	0	3	0	2	0		0	0	0	0	0	0	0
				kmer 19	0	0	0	0	0	0	0	0	0	0	0	0	0	0	0	0	2	0	1	0		0	0	0	0	0	0	0
		Custom Sensitivity	read	non-redundant	0	1	32	0	4210	1	18	1	30	6752	0	0	0	0	0	0	13	7	47	0		10	0	0	0	0	3	0
				redundant	0	9	65	0	1182674	3	36	1	76	4205810	0	0	0	0	0	0	41	21	315	0		8999	0	0	0	0	3	0
			coverage, %	non-redundant	-	0.1	3.8	-	4.2	0.3	3	0.2	8.3	3.6	-	-	-	-	-	-	40.2	14.6	73.2	-		0.7	-	-	-	-	0.9	-
				redundant	-	0.2	6.7	-	8.2	0.6	5.7	0.2	17.6	9.8	-	-	-	-	-	-	45.6	18.2	91.7	-		1.5	-	-	-	-	0.9	-
	Vitis free reads	contig blastn (Geneious)		kmer 15	0	0	112	0	45	6	7	0	64	18	0	0	0	2	1	0	15	2	24	0		0	0	0	0	1	0	0
				kmer 17	0	0	101	0	39	2	5	0	43	12	0	0	0	1	0	0	12	0	17	0		0	0	0	0	1	0	0
				kmer 19	0	0	81	0	36	4	4	0	34	12	0	0	0	1	1	0	11	1	15	0		0	0	0	0	0	1	0
		contig blastn (SPAdes)		kmer 15	0	0	0	0	2	0	0	0	2	1	0	0	0	0	0	0	2	0	1	0		0	0	0	0	0	0	0
				kmer 17	0	0	0	0	0	0	0	0	1	0	0	0	0	0	0	0	3	0	1	0		0	0	0	0	0	0	0
				kmer 19	0	0	0	0	0	0	0	0	0	0	0	0	0	0	0	0	2	0	1	0		0	0	0	0	0	0	0
		Custom Sensitivity	read	non-redundant	0	1	32	0	269	1	19	1	30	2350	0	0	0	0	0	0	13	7	47	0		10	0	0	0	0	3	0
				redundant	0	9	65	0	119472	3	30	1	76	301231	0	0	0	0	0	0	41	21	315	0		8665	0	0	0	0	3	0
			coverage, %	non-redundant	-	0.1	3.8	-	4.2	0.3	3	0.2	8.3	3.6	-	-	-	-	-	-	40.2	14.6	73.2	-		0.7	-	-	-	-	0.9	-
				redundant	-	0.2	6.7	-	7.7	0.6	5.7	0.2	17.6	9.8	-	-	-	-	-	-	45.6	18.2	91.7	-		1.6	-	-	-	-	0.9	-
	Sanger sequencing				-	-	S	-	S	S	S	S	S	S	-	-		S			S	S	S	-		-	-	-	-	-	-	-
Lib-05_S22	With Vitis reads	contig blastn (Geneious)		kmer 15	0	0	0	0	121	4	5	0	82	10	1	0	0	2	37	7	30	13	22	0		5	0	0	2	6	8	0
				kmer 17	0	0	0	0	106	2	3	0	74	8	1	0	0	5	39	3	33	11	16	0		6	2	0	0	5	4	0
				kmer 19	0	0	0	0	100	2	4	0	53	5	1	0	0	6	29	7	29	11	16	0		6	2	0	2	2	4	0
		contig blastn (SPAdes)		kmer 15	0	0	0	0	9	4	0	0	9	2	0	0	0	3	14	3	1	0	1	0		3	0	0	0	3	0	0
				kmer 17	0	0	0	0	3	0	0	0	5	1	0	0	0	2	7	3	3	1	0	0		1	0	0	0	1	0	0
				kmer 19	0	0	0	0	0	0	0	0	2	0	0	0	0	1	3	0	2	1	1	0		0	0	0	0	0	0	0
		Custom Sensitivity	read	non-redundant	0	3	0	0	6715	6	8441	0	40	8068	0	0	0	15	5	7	18	9	37	0		8	3	7	0	0	16603	1
				redundant	0	4	0	0	9215	8	2351	2	19163	4062837	1	0	0	10	48	31756	73	37	272	0		73	8	20	8	6	2584829	1
			coverage, %	non-redundant	-	0.1	-	-	6.9	1.7	1.8	-	9.5	2.9	-	-	-	7.6	1.2	7.8	51.9	33.9	65.9	-		1.2	1	7.5	-	-	0.6	0.1
				redundant	-	0.1	-	-	11.9	2.3	3.1	0.3	22.4	4.2	0.3	-	-	2.4	11.8	19	70.8	43.3	97.4	-		3.1	2	11.9	3.4	1.7	2.3	0.1
	Vitis free reads	contig blastn (Geneious)		kmer 15	0	0	0	0	125	4	5	0	80	12	1	0	0	5	44	7	31	15	24	0		5	0	0	2	5	7	0
				kmer 17	0	0	0	0	111	2	4	0	72	10	1	0	0	5	42	5	29	11	15	0		6	2	0	1	4	6	0
				kmer 19	0	0	0	0	105	3	4	0	53	5	1	0	0	6	31	6	27	11	13	0		6	2	0	2	1	5	0
		contig blastn (SPAdes)		kmer 15	0	0	0	0	8	3	0	0	10	1	0	0	0	3	13	4	2	0	1	0		3	0	0	0	3	0	0
				kmer 17	0	0	0	0	4	0	0	0	5	1	0	0	0	2	6	3	3	1	2	0		1	0	0	0	1	0	0
				kmer 19	0	0	0	0	0	0	0	0	2	0	0	0	0	1	3	0	2	1	1	0		0	0	0	0	0	0	0
		Custom Sensitivity	read	non-redundant	0	3	0	0	159	6	2489	0	40	2335	0	0	0	5	13	6	18	9	37	0		7	2	7	3	4	7467	1
				redundant	0	4	0	0	9028	8	119095	2	19008	173414	1	0	0	10	50	30395	73	37	272	0		11	11	20	7	7	79068	1
			coverage, %	non-redundant	-	0.1	-	-	6.8	1.7	1.8	-	9.5	2.9	-	-	-	1.5	7.1	7.8	51.9	33.9	65.9	-		1.5	0.7	7.5	1.6	1.1	0.7	0.1
				redundant	-	0.1	-	-	11.8	2.3	3.2	0.3	22.4	4.2	0.3	-	-	2.4	12.3	19	70.8	43.3	97.4	-		2.1	2.5	11.9	3.4	2	2.3	0.1
	Sanger sequencing				-	-	-	-	S	S	S	S	S	S	S	-		S			S	S	S	-		-	-	-	-	-	-	-
Lib-06_S23	With Vitis reads	contig blastn (Geneious)		kmer 15	30	0	0	0	53	0	2	0	76	16	1	16	32	0	0	0	9	0	28	0		0	0	0	0	0	0	0
				kmer 17	26	0	0	0	49	0	0	0	69	16	2	9	32	0	0	0	7	0	30	0		0	0	0	0	0	0	0
				kmer 19	29	0	0	0	44	0	0	0	60	11	1	9	24	0	0	0	5	0	26	0		0	0	0	0	0	0	0
		contig blastn (SPAdes)		kmer 15	2	0	0	0	2	0	0	0	5	1	0	0	2	0	0	0	3	0	2	0		0	0	0	0	0	0	0
				kmer 17	2	0	0	0	2	0	0	0	3	1	0	0	0	0	0	0	0	1	2	0		0	0	0	0	0	0	0
				kmer 19	1	0	0	0	1	0	0	0	1	1	0	0	0	0	0	0	0	1	2	0		0	0	0	0	0	0	0
		Custom Sensitivity	read	non-redundant	3553	5	1	0	23	0	15	0	22	23	1	1774	1842	0	0	0	3	1	17	0		16	0	0	0	0	0	0
				redundant	1036889	7	1	0	8211	1	20	0	29	30	1	288975	289638	0	0	0	10	2465	107	0		6220	0	0	0	0	0	0
			coverage, %	non-redundant	1	0.2	0.1	-	3.6	-	0.6	-	6.7	2.7	0.3	3.5	5	-	-	-	24.6	5.2	60.9	-		1	-	-	-	-	-	-
				redundant	1.4	0.2	0.1	-	5.6	0.4	0.6	-	8.8	3.1	0.3	4.8	8.3	-	-	-	36.1	13.8	98.3	-		1.6	-	-	-	-	-	-
	Vitis free reads	contig blastn (Geneious)		kmer 15	35	0	0	0	52	0	2	0	73	20	1	12	37	0	0	0	8	0	26	0		0	0	0	0	0	0	0
				kmer 17	24	0	0	0	49	0	0	0	69	16	2	9	31	0	0	0	7	0	25	0		0	0	0	0	0	0	0
				kmer 19	28	0	0	0	44	0	0	0	62	12	1	11	22	0	0	0	5	0	25	0		0	0	0	0	0	0	0
		contig blastn (SPAdes)		kmer 15	1	0	0	0	2	0	0	0	4	1	0	0	1	0	0	0	3	0	2	0		0	0	0	0	0	0	0
				kmer 17	2	0	0	0	2	0	0	0	2	1	0	0	0	0	0	0	0	1	2	0		0	0	0	0	0	0	0
				kmer 19	1	0	0	0	2	0	0	0	1	1	0	0	0	0	0	0	0	1	2	0		0	0	0	0	0	0	0
		Custom Sensitivity	read	non-redundant	1693	5	1	0	22	0	13	0	22	21	1	842	853	0	0	0	3	1	17	0		8	0	0	0	0	0	0
				redundant	83099	7	1	0	28	1	17	0	29	28	1	41315	41546	0	0	0	10	2462	107	0		4050	0	0	0	0	0	0
			coverage, %	non-redundant	1	0.2	0.1	-	3.5	-	0.5	-	6.7	2.6	0.3	3.5	5	-	-	-	24.6	5.2	60.9	-		0.6	-	-	-	-	-	-
				redundant	1.4	0.2	0.1	-	5.1	0.4	0.5	-	8.8	3.1	0.3	4.8	8.3	-	-	-	36.1	13.8	98.3	-		1.8	-	-	-	-	-	-
	Sanger sequencing				S	-	-	-	S	S	S	S	S	S	S	S		-			S	-	S	-		-	-	-	-	-	-	-

## Sheet: Table S7
Supplementary materials, Navrotskaya et al., 2021 High-Throughput Sequencing of Small RNAs for Diagnostics of Grapevine Viruses and Viroids in Russia
Supplementary Table S7
Supplementary of bioinformatics analysis on different sensetivity level
Summary of the bioinformatic approaches (read mapping to reference genome on different sensitivity level) used in the study for the small RNA HTS analysis according to libraries and viruses. Mapping was carried out only if the library managed to fined at least 1 contig of this virus. n/c means not colculated.
Library code	Analysis				Viruses																Viroids					Non-validated
					Closteroviridae				Tymovidae			Betaflexiviridae				Idaeovirus		Secoviridae								Secoviridae					Tymoviridae	Closteroviridae
					GLRaV-1 (NC_016509)	GLRaV-2 (NC_007448)	GLRaV-3 (NC_004667)	GLRaV-4 (NC_016416)	GFkV (NC_003347)	GRVFV (NC_034205)	GSyV-1 (NC_012484)	GVT (NC_035203)	GPGV (NC_015782)	RSPaV (NC_001948)	GVA (NC_003604)	RBDV RNA2 (NC_003740)	RBDV RNA1 (NC_0033739)	GFLV RNA1 (NC_003615)	GFLV RNA2 NC_003623 (F13)	GFLVsat (NC_003203)	GYSVd-1 (NC_001920)	GYSVd-2 (NC_003612)	HSVd (NC_001351)	AGVd (NC_003553)		ArMV RNA2 (NC_006056)	ArMV RNA1 (NC_006057)	ArMV Sat (NC_003523)	GDeV RNA2 (NC_017938)	GDeV RNA1 (NC_017939)	GRGV (NC_030693)	GLRaV-2RG (=GRSLaV) NC_004724
Zs85-SV2_S19	Medium-Low sensitivity	With Vitis	read	non-redundant	162774	545309	987463	n/c	223703	194144	185351	n/c	480558	151867	151266	n/c		n/c			10181	84	62677	179578		n/c			n/c		n/c	104801
				redundant	1812347	6676252	9796748		3180401	1233389	2460438		6010961	2594026	2633814						643	553	1418181	1341793								1991555
			coverage, %	non-redundant	3.9	16.8	53.7		12.1	5.4	8.4		35.1	11.6	4						100	85.7	72.7	98.6								1.5
				redundant	6.3	30	79.8		20.4	5.2	10.3		59.3	23.4	8.9						100	100	100	99.7								3.7
		Vitis free	read	non-redundant	22943	99196	198805		43	20997	10188		53250	22011	22541						986	80	7467	7193								12507
				redundant	219306	337468	499610		252418	195616	63		383039	287285	243516						716	219390	601	229166								260993
			coverage, %	non-redundant	3.5	14.6	50		8.7	5.3	6.1		29.1	10.9	4						100	85.4	93.7	90.8								1.5
				redundant	5.1	24.7	74.7		15.6	3.9	7.3		52.6	21.7	8						100	100	100	95.7								3.3
	Low sensitivity	With Vitis	read	non-redundant	2605	3	2939		2580	0	2		3	2	0						2	2	1	4								0
				redundant	551103	6	200454		212815	0	14		5	2	0						49	68	41870	21								0
			coverage, %	non-redundant	0.5	0.6	4.1		2.4	-	0.4		1.1	0.6	-						7.9	15.2	8.9	28.2								-
				redundant	0.7	1.1	10.3		3.1	-	0.4		1.8	0.6	-						79.8	75.2	82.8	52.3								-
		Vitis free	read	non-redundant	641	3	701		710	0	2		3	2	0						1	2	1	4								0
				redundant	2532	6	3207		4864	0	14		5	2	0						49	68	1026	21								0
			coverage, %	non-redundant	0.5	0.6	4.1		2.4	-	0.4		1.1	0.6	-						7.9	15.2	8.9	28.2								-
				redundant	0.7	1.1	10.3		3.1	-	0.4		1.8	0.6	-						79.8	75.2	82.8	52.3								-
	Custom Sensitivity	With Vitis	read	non-redundant	3067	82	5226		42	3361	20		64	3521	5						71	38	58	34								3862
				redundant	666352	102853	673366		11171	295864	50		37898	634006	18						382	308	496	134								463694
			coverage, %	non-redundant	2.2	7.4	26.9		6.4	1.8	2.6		16.6	7.4	1.5						86.3	70.5	80.5	71								0.8
				redundant	3.2	15.7	53.8		10	1.8	4.4		31	11.3	3.5						97	96.7	94	92.1								1.7
		Vitis free	read	non-redundant	1059	82	2113		42	1134	21		64	1173	5						71	38	58	34								1129
				redundant	77694	58173	88303		10757	80704	50		31873	79278	18						382	308	496	134								90573
			coverage, %	non-redundant	2.2	7.4	26.9		6.4	1.8	2.6		16.6	7.4	1.5						86.3	70.5	80.5	71.3								0.8
				redundant	3.2	15.7	53.8		10	1.8	4.4		31	11.3	3.5						97	96.7	94	92.1								1.7
Lib-03_S20	Medium-Low sensitivity	With Vitis	read	non-redundant	7	n/c	387035	1	241228	122212	83920	n/c	235609	176641	n/c	n/c		n/c			1368	47801	82596	72279		n/c			n/c		n/c	n/c
				redundant	4429841		8585293	450835	7553795	4535436	3743406		6604747	5877837							4289219	4750276	4694157	4383506
			coverage, %	non-redundant	0.7		15.5	0.2	23.7	2.9	1.6		17.9	9.2							74.3	79.1	99.3	33.6
				redundant	1.2		23.7	0.8	42.3	3.4	1.8		31	20.2							85.5	90.1	100	70.7
		Vitis free	read	non-redundant	500942		491331	423013	510270	451253	379038		495562	492731							176257	94085	114087	266709
				redundant	493985		611700	2	583382	506457	20		533982	504395							498779	479782	487110	432328
			coverage, %	non-redundant	62.5		90.6	81.8	97.8	90.3	84.7		86.4	84.6							100	100	100	100
				redundant	1.1		21.2	0.4	37.2	3.1	1.2		24.9	15.3							90.4	82.6	100	54.2
	Low sensitivity	With Vitis	read	non-redundant	0		6	0	7	0	4		2	0							1	1	2	2
				redundant	0		11	0	29	0	5		3	0							2	7	22	4
			coverage, %	non-redundant	-		0.9	-	2.2	-	0.4		0.7	-							8.5	6.9	16.6	10
				redundant	-		1.4	-	6.6	-	0.4		1	-							15.3	28.9	53.3	18.4
		Vitis free	read	non-redundant	0		6	0	7	0	2		2	0							1	1	2	2
				redundant	0		11	0	29	0	2		3	0							2	7	22	4
			coverage, %	non-redundant	-		0.9	-	2.2	-	0.4		0.7	-							8.5	6.9	16.6	10
				redundant	-		1.4	-	6.6	-	0.4		1	-							15.3	28.9	53.3	18.4
	Custom Sensitivity	With Vitis	read	non-redundant	5		7282	0	81	5558	6698		30	7162							14	35	39	3
				redundant	8		897818	1	15147	1272491	3420852		56	3193085							97	143	314	13
			coverage, %	non-redundant	0.5		5.2	-	8.4	1.4	0.9		8.2	4.1							42.1	57.6	61.6	15.2
				redundant	0.6		8.9	0.2	19	1.9	1.1		14.1	7.6							58.5	74.7	89.7	37.1
		Vitis free	read	non-redundant	5		2364	0	81	2063	1930		30	1943							14	35	39	3
				redundant	8		112706	1	6014	123703	160621		56	115197							97	143	314	13
			coverage, %	non-redundant	0.5		5.2	-	8.4	1.4	0.9		8.2	4							42.1	57.6	61.6	15.2
				redundant	0.6		8.9	0.2	18.5	1.9	1.2		14.1	7.5							58.5	74.7	89.7	37.1
Lib-04_S21	Medium-Low sensitivity	With Vitis	read	non-redundant	n/c	n/c	202631	n/c	105371	103453	29	n/c	386546	129615	n/c	n/c		86840	0	0	17	154	97679	n/c		n/c			0	1	5	n/c
				redundant			6674903		4896974	4519898	213137		7745578	6112372				4519300	0	0	79	5857261	4780537						0	1	5
			coverage, %	non-redundant			8.7		9.4	2.2	3.8		73.4	7.5				1.6	-	-	44	28.9	94.7						-	0.3	1.6
				redundant			15.8		15.2	2.1	7.2		40.6	17.2				1.6	-	-	58.5	51.2	100						-	0.3	1.6
		Vitis free	read	non-redundant			476557		441105	383679	390078		446446	443781				70676	0	0	119357	189295	52246						124442	261543	348444
				redundant			591245		542433	538201	36		591538	534602				547643	0	0	74	518511	536090						0	1	5
			coverage, %	non-redundant			82		83.6	90.9	47.2		90.4	80				1.6	-	-	100	94.8	100						61.2	75.2	49.6
				redundant			14.6		12.8	1.9	6.2		33.5	13				1.6	-	-	57.7	30.9	97.7						-	0.3	1.6
	Low sensitivity	With Vitis	read	non-redundant			3		1	0	1		2	1				0	0	0	0	0	1						0	0	0
				redundant			8		3	0	1		3	1				0	0	0	0	1	44						0	0	0
			coverage, %	non-redundant			0.5		0.4	-	0.4		0.7	0.3				-	-	-	-	-	9.9						-	-	-
				redundant			0.9		1.1	-	0.4		1	0.3				-	-	-	-	6.6	53.3						-	-	-
		Vitis free	read	non-redundant			3		1	0	1		2	1				0	0	0	0	0	1						0	0	0
				redundant			8		3	0	1		3	1				0	0	0	0	1	44						0	0	0
			coverage, %	non-redundant			0.5		0.4	-	0.4		0.7	0.3				-	-	-	-	0	9.9						-	-	-
				redundant			0.9		1.1	-	0.4		1	0.3				-	-	-	-	6.6	53.3						-	-	-
	Custom Sensitivity	With Vitis	read	non-redundant			32		4210	1	18		30	6752				0	0	0	13	7	47						0	0	3
				redundant			65		1182674	3	36		76	4205810				0	0	0	41	21	315						0	0	3
			coverage, %	non-redundant			3.8		4.2	0.3	3		8.3	3.6				-	-	-	40.2	14.6	73.2						-	-	0.9
				redundant			6.7		8.2	0.6	5.7		17.6	9.8				-	-	-	45.6	18.2	91.7						-	-	0.9
		Vitis free	read	non-redundant			32		269	1	19		30	2350				0	0	0	13	7	47						0	0	3
				redundant			65		119472	3	30		76	301231				0	0	0	41	21	315						0	0	3
			coverage, %	non-redundant			3.8		4.2	0.3	3		8.3	3.6				-	-	-	40.2	14.6	73.2						-	-	0.9
				redundant			6.7		7.7	0.6	5.7		17.6	9.8				-	-	-	45.6	18.2	91.7						-	-	0.9
Lib-05_S22	Medium-Low sensitivity	With Vitis	read	non-redundant	n/c	n/c	n/c	n/c	129651	70833	165941	n/c	256488	63510	0	n/c		178667	205967	70095	28	17	60959	n/c		78212	30581	9	77139	38773	71015	n/c
				redundant					5640250	4651132	4770240		6302366	4506105	1			4896082	5693547	4932583	4459269	4274086	4296032			1478369	17341	3929963	3886678	1373494	1727180
			coverage, %	non-redundant					15.9	3.7	6.7		24.8	5.9	-			8	19.7	27.3	74	54	92.7			4.8	2.1	12	3.6	4.4	1.2
				redundant					24	5.3	9.6		45.7	8.6	0.3			9.5	29.5	45.6	91.3	83.7	100			8.8	3.1	29.1	9	6.3	4.4
		Vitis free	read	non-redundant					523398	467773	477762		525355	508968	247014			159325	185184	59906	197523	107172	34323			108022	257001	120618	225660	288955	443824
				redundant					553082	212875	518554		559649	519813	1			669788	1628565	745172	521088	215599	528460			418385	12	119675	421343	113483	520336
			coverage, %	non-redundant					94.1	83.3	69.9		84.5	84.4	69.6			8	19.7	27.3	100	99.7	100			77.9	82.4	74.4	94	68.3	87.8
				redundant					21.6	3.9	6.9		38.4	7.4	0.3			8.6	29.5	45.3	88.3	74.1	100			7.1	2.4	20.8	5.9	5.7	3.4
	Low sensitivity	With Vitis	read	non-redundant					5	0	2		4	0	0			0	1	1	3	0	1			0	0	0	0	0	0
				redundant					9	0	6		8	0	0			0	1	2	11	3	97358			0	0	0	0	0	0
			coverage, %	non-redundant					1.7	-	0.4		1.5	-	-			-	0.7	2.3	18	-	9.6			-	-	-	-	-	-
				redundant					3	-	0.4		1.8	-	-			-	0.7	4.1	33.3	12.1	72.8			-	-	-	-	-	-
		Vitis free	read	non-redundant					5	0	1		4	0	0			0	1	1	3	0	1			0	0	0	0	0	0
				redundant					9	0	4		8	0	0			0	1	2	11	3	505			0	0	0	0	0	0
			coverage, %	non-redundant					1.7	-	0.4		1.5	-	-			-	0.7	2.3	18	0	9.6			-	-	-	-	-	-
				redundant					3	-	0.4		1.8	-	-			-	0.7	4.1	33.3	12.1	72.2			-	-	-	-	-	-
	Custom Sensitivity	With Vitis	read	non-redundant					6715	6	8441		40	8068	0			15	5	7	18	9	37			8	3	7	0	0	16603
				redundant					9215	8	2351		19163	4062837	1			10	48	31756	73	37	272			73	8	20	8	6	2584829
			coverage, %	non-redundant					6.9	1.7	1.8		9.5	2.9	-			7.6	1.2	7.8	51.9	33.9	65.9			1.2	1	7.5	-	-	0.6
				redundant					11.9	2.3	3.1		22.4	4.2	0.3			2.4	11.8	19	70.8	43.3	97.4			3.1	2	11.9	3.4	1.7	2.3
		Vitis free	read	non-redundant					159	6	2489		40	2335	0			5	13	6	18	9	37			7	2	7	3	4	7467
				redundant					9028	8	119095		19008	173414	1			10	50	30395	73	37	272			11	11	20	7	7	79068
			coverage, %	non-redundant					6.8	1.7	1.8		9.5	2.9	-			1.5	7.1	7.8	51.9	33.9	65.9			1.5	0.7	7.5	1.6	1.1	0.7
				redundant					11.8	2.3	3.2		22.4	4.2	0.3			2.4	12.3	19	70.8	43.3	97.4			2.1	2.5	11.9	3.4	2	2.3
Lib-06_S23	Medium-Low sensitivity	With Vitis	read	non-redundant	118041	n/c	n/c	n/c	73790	n/c	56687	n/c	145033	75667	1	69101	95672	n/c			30099	2	33804	n/c		n/c			n/c		n/c	n/c
				redundant	3206802				2117337		1656771		2945550	1654586	1	722908	1616044				1514185	1594665	201
			coverage, %	non-redundant	3.8				12.5		4.1		16.7	7.9	0.3	17.3	14.6				56.3	14.6	98.7
				redundant	4.1				15.1		4.5		21.8	9.2	0.3	22.4	16.9				53.6	41.3	100
		Vitis free	read	non-redundant	20828				14106		7600		24837	12157	1	14891	23322				3267	2	5992
				redundant	409617				419054		404858		431872	404581	1	204539	242117				128798	332954	188
			coverage, %	non-redundant	3				10.2		3.7		12.8	6.9	0.3	15.3	13.8				53.3	14.6	98.7
				redundant	3				12.4		4		16.6	6.7	0.3	18.2	15.5				49.7	40.5	100
	Low sensitivity	With Vitis	read	non-redundant	3				3		4		6	1	0	1470	1239				2	0	2
				redundant	3				5		4		6	1	0	270575	225416				2	0	10
			coverage, %	non-redundant	0.4				1.2		0.5		2.3	0.3	-	2.4	1				19.4	-	21.2
				redundant	0.4				2.1		0.5		2.3	0.3	-	2.4	1.5				19.4	-	49.7
		Vitis free	read	non-redundant	3				3		2		6	1	0	736	467				2	0	2
				redundant	3				5		3		6	1	0	2558	1402				2	0	10
			coverage, %	non-redundant	0.4				1.2		0.5		2.3	0.3	-	2.4	1				19.4	-	21.2
				redundant	0.4				2.1		0.5		2.3	0.3	-	2.4	1.5				19.4	-	49.7
	Custom Sensitivity	With Vitis	read	non-redundant	3553				23		15		22	23	1	1774	1842				3	1	17
				redundant	1036889				8211		20		29	30	1	288975	289638				10	2465	107
			coverage, %	non-redundant	1				3.6		0.6		6.7	2.7	0.3	3.5	5				24.6	5.2	60.9
				redundant	1.4				5.6		0.6		8.8	3.1	0.3	4.8	8.3				36.1	13.8	98.3
		Vitis free	read	non-redundant	1693				22		13		22	21	1	842	853				3	1	17
				redundant	83099				28		17		29	28	1	41315	41546				10	2462	107
			coverage, %	non-redundant	1				3.5		0.5		6.7	2.6	0.3	3.5	5				24.6	5.2	60.9
				redundant	1.4				5.1		0.5		8.8	3.1	0.3	4.8	8.3				36.1	13.8	98.3

## Sheet: Table S8
Supplementary materials, Navrotskaya et al., 2021 High-Throughput Sequencing of Small RNAs for Diagnostics of Grapevine Viruses and Viroids in Russia
Supplementary Table S8
Supplementary of the HTS validation by RT-PCR
Positive result of the PCR was marked as '+'. The absence of a mark means that there was no PCR product.
Sample number		18s	Closteroviridae				Tymovidae			Betaflexiviridae				Idaeovirus	Secoviridae	Viroids				Total number of viral pathogens
			GLRaV-1	GLRaV-2	GLRaV-3	GLRaV-4	GFkV	GRVFV	GSyV-1	GPGV	GVT	GRSPaV	GVA	RBDV	GFLV	GYSVd-1	GYSVd-2	HSVd	AGVd
Zs85-SV2_S19	1606	+			+		+	+	+	+	+	+					+		+	9
	1609	+	+		+		+		+	+	+	+	+					+		9
	1610	+	+	+	+		+	+	+	+		+	+					+		10
	1612	+					+		+	+		+						+		5
	1615	+		+			+			+	+	+					+		+	7
	1619	+		+	+		+		+	+		+				+		+		8
	1620	+		+	+		+	+	+	+		+				+	+	+	+	11
	Pool 2	+	+	+	+		+	+	+	+	+	+	+			+	+	+	+	15
Lib-03_S20	263	+			+				+	+		+					+	+	+	7
	347	+					+		+	+	+	+				+			+	7
	351	+					+			+	+	+				+		+		6
	622	+					+		+	+	+	+					+	+		7
	628	+			+		+		+	+	+					+		+		7
	650	+				+	+		+	+		+				+		+		7
	654	+					+	+	+	+	+	+				+		+		8
	1512	+	+				+		+	+	+	+				+		+		8
	1515	+				+	+	+	+	+	+	+				+		+		9
	Pool 3	+	+		+	+	+	+	+	+	+	+				+	+	+	+	13
Lib-04_S21	289	+							+	+		+						+		4
	290	+								+										1
	377	+					+		+	+		+			+	+		+		7
	429	+			+		+	+	+	+		+						+		7
	588	+							+			+				+	+	+		5
	1524	+							+	+	+	+				+		+		6
	1533	+							+	+		+				+		+		5
	Pool 4	+			+		+	+	+	+	+	+			+	+		+		10
Lib-05_S22	267	+					+		+	+		+					+			5
	269	+							+	+	+	+			+	+		+		7
	301	+					+	+	+	+	+	+	+		+	+		+		10
	302	+							+	+		+				+	+			5
	337	+					+	+		+	+	+			+			+		7
	370	+					+	+	+			+								4
	508	+					+		+	+		+				+		+		6
	635	+					+		+	+	+	+	+			+		+		8
	Pool 5	+					+	+	+	+	+	+	+		+	+	+	+		11
Lib-06_S23	384	+					+			+		+				+		+		5
	393	+	+				+			+		+						+		5
	409	+							+	+		+						+		4
	410	+							+	+		+						+		4
	449	+					+	+	+	+		+	+							6
	471	+	+						+		+		+							4
	476	+					+		+			+		+		+		+		6
	Pool 6	+	+				+	+	+	+	+	+	+	+		+		+		11

## Sheet: Table S9
Supplementary materials, Navrotskaya et al., 2021 High-Throughput Sequencing of Small RNAs for Diagnostics of Grapevine Viruses and Viroids in Russia
Supplementary Table S9
Initial data for alignment of viruses genomes
Pathogen's name	Database sequences		This work sequences		Total sequences number	Date of download
	type of data	number of sequences	type	number of sequences
GLRaV-1	coat protein (cp) gene	411	coat protein (cp)	4	415	2021-03-14
GLRaV-2	coat protein (cp) gene	313	coat protein (cp)	1	314	2021-03-15
GLRaV-3	coat protein (cp) gene	962	coat protein (cp)	4	966	2021-03-15
GLRaV-4	all	117	hsp70	1	118	2021-03-15
GFkV	coat protein (cp) gene	65	coat protein (cp)	17	82	2021-03-15
GVT	all	58	coat protein (cp)	11	69	2021-03-16
GPGV	coat protein (cp) gene	329	coat protein (cp)	19	348	2021-03-17
GRVFV	all	108	polyprotein	9	117	2021-03-16
GRSPaV	coat protein (cp) gene	1025	coat protein (cp)	22	1047	2021-03-17
GVA	coat protein (cp) gene	434	coat protein (cp)	5	439	2021-03-16
GSyV-1	coat protein (cp) gene	59	coat protein (cp)	12	71	2021-03-11
GFLV	polyprotein gene	280	polyprotein	4	284	2021-03-26
RBDV	all	86	coat protein (cp)	2	88	2021-03-17
GYSVd-1	all	223	partial genome	11	234	2021-04-04
GYSVd-2	all	118	complete genome	5	123	2021-04-04
AGVd	all	184	partial genome	2	186	2021-04-04
HSVd	all	855	complete genome	19	874	2021-04-01

## Sheet: Table S10
Supplementary materials, Navrotskaya et al., 2021 High-Throughput Sequencing of Small RNAs for Diagnostics of Grapevine Viruses and Viroids in Russia
Supplementary Table S10
Test of novel recombination events calculated for viruses. Analysis was performed using RDP v4.10 software. Detection recombination methods: RPD (R); GENECONV (G); BootScan (B); MaxChi (M); Chimaera (C); SiScan (S); 3Seq (T) and Phylpro. The table shows data for isolates in which it was possible to detect recombination by three or more methods.
GLRaV-1
№	Recombinant	Major parent	Region derived from major parent	Minor parent	Region derived from minor parent	RDP P-Val	SiScan P-Val	Detection Method
1	MZ031984	JF811846.1_2	18073-21011	MW810492	1-180972 & 21012-23476	--	6,790x10^-17	G M C S T
2	KY821089.1	Unknown	1-14369&19017-23466	MH807218.1	14370-19016	1,389x10^-257	8,062x10^-88	R G M C S T
3	AF195822.1	MH807214.1	1-10731&13881-23466	Unknown	10732-13880	9,472x10^-152	8,937x10^-87	R G M C S T
4	KY827404.1	JQ023131.1	1-4509&13884-23466	Unknown	4510-13883	3,388x10^-68	2,241x10^10-32	R B M C S T
5	MH807216.1	JQ023131.1	1-14783&23229-23466	MH807223.1	14784-23228	2,269x10^-13	1,516x10^-130	R G B M C S T
6	JX983132.1	KC567946.1	18129-18759	JX983133.1	1-18128&18760-23466	5,220x10^-14	1,933x10^-06	R G B M C S T
7	LR135615.1	Unknown	1-18091&18537-23466	KC567897.1	18092-18536	1,497x10^-06	7,853x10^-06	R M C S T
8	KP067368.1	KP067357.1	1-18205&18529-23466	JF811840.1_2	18206-18528	--	2,316x10^-04	M C S T
GLRaV-2
№	Recombinant	Major parent	Region derived from major parent	Minor parent	Region derived from minor parent	RDP P-Val	SiScan P-Val	Detection Method
1	KP704568.1	KP704570.1	1-31571&31909-31999	KP704577.1	31572-31908	4,652x10^-17	1,177x10^-14	R G M C S T
2	MN716765.1	KP744860.1	1-31255&31837-31999	KP704578.1	31256-31836	--	1,137x10^-30	G M C S T
GLRaV-3
№	Recombinant	Major parent	Region derived from major parent	Minor parent	Region derived from minor parent	RDP P-Val	SiScan P-Val	Detection Method
1	MH521105.2	KY764332.1	1-9452&19981-20126	JQ655296.1	9453-19980	4,290x10^-196	3,122x10^-122	R G B M C S T
2	MH814484.1	MN548393.1	1-317&318-924	MH814485.1	318-924	7,942x10^-60	1,791x10^-25	R G B M C S T
3	MK988555.1	MH814483.1	1-15359&16145-20126	MH796135.1	15360-16144	3,525x10^-45	5,774x10^-11	R G B M C S T
4	MK032068.1	JQ655296.1	1-8653&10869-20126	MH814489.1	8654-10868	1,221x10^-32	5,379x10^-18	R B M C S T
5	KY073324.1	MH521098.2	1-9227&10695-20126	MH521090.2	9228-10694	1,278x10^-27	1,182x10^-38	R G M C S
6	JX088221.1	MH521104.2	1-15185&15524-20126	KP401790.1	15186-15523	4,950x10^-05	1,407x10^-16	R G B M C S T
7	JX088168.1	KC477147.1	1-15679&18121-20126	KC417451.1	15680-18120	--	2,991x10^-03	M C S T
GLRaV-4
№	Recombinant	Major parent	Region derived from major parent	Minor parent	Region derived from minor parent	RDP P-Val	SiScan P-Val	Detection Method
1	FJ467503.1	KY821095.1	1-17121&18047-30475	KY940817.1	17122-18046	3,040x10^-274	1,257x10^-56	R G M C S T
2	AB720875.1	KP313764.1	28435-30423	AB720874.1	1-28434&30424-30475	1,266x10^-55	1,443x10^-80	R G B M C S T
GVT
№	Recombinant	Major parent	Region derived from major parent	Minor parent	Region derived from minor parent	RDP P-Val	SiScan P-Val	Detection Method
1	MH638265.1	MH67417	443-7984	MH674182.1	1-442&785-8953	1,440x10^-40	1,300x10^-15	R B M C S T
2	MH388491.1	MH674178.1	1-8743&8905-8953	MH674180.1	8744-8904	--	1,107x10^-08	G B M C S T
3	MH061382.1	MG001925.1	1-1559&2957-8953	MH674177.1	1560-2956	5,495x10^-22	4,519x10^-24	R G B M C S T
4	MH674177.1	MH674167.1	1-3301&5291-8953	MH638265.1	3302-5290	1,651x10^-15	1,943x10^-31	R G B M C S T
5	MH061382.1	MH674180.1	1-6048&7159-8953	MH674177.1	6049-7158	8,595x10^-12	6,316x10^-09	R G B M C S T
GPGV
№	Recombinant	Major parent	Region derived from major parent	Minor parent	Region derived from minor parent	RDP P-Val	SiScan P-Val	Detection Method
1	MH087442.1	MH087444	10931-16009	MH087445.1	1-10930&16010-16141	3,796x10^-09	--	R G M C
GRSPaV
№	Recombinant	Major parent	Region derived from major parent	Minor parent	Region derived from minor parent	RDP P-Val	SiScan P-Val	Detection Method
1	MN716766.1	KX034981.1	1-6001&18120-18147	KX958235.1	6002-18119	2,318x10^-205	2,757x10^-82	R G B M C S T
2	KX958435.1	KX274277.1	1-2434&17985-18147	MG938313.1	2435-17984	1,067x10^-139	2,456x10^-02	R G M C S T
3	MG938303.1	MK8044768.1	1-6811&18070-18147	AY368172.2	6812-18069	2,245x10^-132	7,481x10^-47	R G B M C S T
4	AY881627.1	MG938347.1	1-6496&18117-18147	MG938294.1	6497-18116	4,940x10^-103	4,568x10^-66	R G M C S T
5	KX274277.1	MG938298.1	1-6791&18117-18147	MG938294.1	6792-18116	4,335x10^-112	2,313x10^-08	R G M C S T
6	MG938294.1	MN228487.1	741-18081	HE591388.1	1-740&18082-18147	2,371x10^-95	5,782x10^-08	R G B M C S T
7	MG938318.1	MG938329.1	1-13070&18115-18147	MG938321.1	13071-18114	--	5,782x10^-08	G M C S T
8	KX034995.1	KX034998.1	1339-18024	KX034997.1	1-1338&18025-18147	3,163x10^-45	1,156x10^-08	R G B M C S T
9	KX034996.1	MG938346.1	1-104&1343-18147	KX034981.1	105-1342	8,123x10^-39	5,484x10^-32	R G B M C S T
10	KX958435.1	KX274277.1	1180-18116	MG938329.1	1-1179&18117-18147	1,513x10^-23	1156x10^-08	R B M C S T
11	AY368590.1	MG938311.1	1-4894&5538-18147	MK804768.1	4895-5537	2,660x10^-19	7,415x10^-17	R G M C S T
12	AY368590.1	MG925337.1	1-5799&6760-18147	MF979534.1	5800-6759	1,255x10^-21	1,156x10^-08	R G M C S T
13	MT855971.1	MT855976.1	7906-17887	MN228487.1	1-7905&17888-18147	4,884x10^-18	1,735x10^-37	R G M C S T
14	MT855969.1	MG938345.1	7887-17871	MN228487.1	1-7886&17872-18147	3,418x10^-16	1,884x10^-20	R G M C S T
15	MT855977.1	KX274276.1	7731-17895	MT855978.1	1-7730&17896-18147	3,319x10^-12	2,004x10^-12	R G M C S T
16	MT855972.1	AY368590.1	7939-17887	MG938347.1	1-7938&17888-18147	3,351x10^-05	1,220x10^-25	R G B M C S T
17	MT855970.1	KX035001.1	1-8312&13363-18147	KX035004.1	8313-13362	1,206x10^-11	5,811x10^-12	R G M C S T
18	FJ943281.1	MG050190.1	8368-18022	FJ943280.1	1-8367&18023-18147	1,257x10^-11	4,860x10^-11	R G M C S T
19	DQ364994.1	MK867356.1	3939-17629	Unknown	1-3938&17630-18147	--	5,094x10^-22	G M C S T
20	MG050432.1	MG938307.1	1-8481&18055-18147	MF595987.1	8482-18054	1,470x10^-03	4,708x10^-18	R B M C S T
21	KT008379.1	FJ943283.1	1-8132&8356-18147	LT906638.1	8133-8355	9,586x10^-10	3,575x10^-08	R G B M C S T
22	FJ943292.1	Unknown	1-13070&18024-18147	FJ943290.1	13071-18023	2,757x10^-03	2,771x10^-06	R G B M C S T
23	FJ943342.1	FJ943343.1	8361-18022	KF731970.1	1-8360&18023-18147	--	3,066x10^-05	G M C S T
GVA
№	Recombinant	Major parent	Region derived from major parent	Minor parent	Region derived from minor parent	RDP P-Val	SiScan P-Val	Detection Method
1	KM233006.1	KM23301	1-7933&8326-8460	KM233009.1	7934-8325	--	1,492x10^-07	G M C S
2	KF013805.1	KF013776.1	7385-8150	MK404722.1	1-7384&8151-8460	--	5,321x10^-07	G B M C S T
3	KF013761.1	KF013802.1	7440-8153	KF013776.1	1-7439&8154-8460	--	3,676x10^-10	G B M C S T
4	KF013838.1	KF013767.1	1-7655&8151-8460	KF013837.1	7656-8150	--	1,291x10^-09	G M C S T
5	KF013785.1	KF013783.1	7457-7755	KF013780.1	1-7456&7756-8460	3,029x10^-07	4,251x10^-11	R G M C S T
6	KF013833.1	KF013851.1	7379-8154	KF013845.1	1-7378&8155-8460	3,575x10^-08	2,793x10^-07	R G M C S T
7	KF013778.1	KF013756.1	3329-7710	KF013801.1	1-3328&7711-8460	2,334x10^-08	--	R G M C T
8	KF013782.1	Unknown	7605-8151	KF013780.1	1-7604&8152-8460	--	2,018x10^-13	M S T
GFLV
№	Recombinant	Major parent	Region derived from major parent	Minor parent	Region derived from minor parent	RDP P-Value	SiScan P-Val	Detection Method
1	MN496422.1	MN496421	1579-9154	MN496423.1	1-1578&9155-11016	--	7,893x10^-56	G B M C S T
2	GU972576.1	GU972577.1	1-7798&9270-11016	Unknown	7799-9269	7,052x10^-48	2,203x10^-50	R G B M C S T
3	GU972582.1	EF426852.1	1-7810&9239-11016	GU972577.1	7811-9238	5,244x10^-40	2,815x10^-53	R G M S T
4	GU972577.1	Unknown	1-7837&9285-11016	GU972575.1	7838-9284	3,261x10^-10	4,753x10^-46	R G B M C S T
5	KC256955.1	GQ332366.1	8149-10871	KC256954.1	1-8148&10872-11016	7,320x10^-26	2,899x10^-26	R G B M C S T
6	AY780899.1	AY780902.1	1-10313&10871-11016	HG939479.1	10314-10870	2,163x10^-33	1,037x10^-17	R G M C S T
7	KC162001.1	HG939479.1	1-10015&10892-11016	GU972572.1	10016-10891	3,384x10^-30	4,673x10^-21	R G B M C S T
8	KC256960.1	KC256958.1	1-9988&10886-11016	Unknown	9989-10885	3,378x10^-32	9,506x10^-20	R G B M C S T
9	GU972572.1	GU972579.1	1-7785&10068-11016	Unknown	7786-10067	4,239x10^-30	4,251x10^-21	R G B M C S T
10	HG939480.1	KC256957.1	1-10165&10887-11016	DQ922678.1	10166-10886	--	--	G B M C
11	NC_003623.1	GQ332366.1	1-3583&7832-11016	GU972581.1	3584-7831	1,803x10^-22	1,629x10^-43	R G M C S
12	MN496426.1	MN496423.1	343-7105	MN496425.1	1-342&7106-11016	4,740x10^-28	1,475x10^-11	R G B M C S
13	GU972583.1	GU972573.1	1-9315&10062-11016	GU972571.1	9316-10061	2,788x10^-18	3,407x10^-11	R G B M C S T
14	GQ332366.1	EF426852.1	1-7403&7701-11016	Unknown	7404-7700	4,202x10^-27	4,504x10^-23	R G M C S T
15	KC256961.1	EF426852.1	1-8218&9687-11016	KC256957.1	8219-9686	3,790x10^-22	9,981x10^-44	R G M C S T
16	GU972575.1	GU972571.1	1-7634&10159-11016	GU972579.1	7635-10158	2,068x10^-21	5,769x10^-15	R G B M C S T
17	GU972577.1	JX513895.1	1-10097&10886-11016	GU972576.1	10098-10885	--	3,764x10^-37	G B M C S
18	MN496417.1	Unknown	1-7191&8332-11016	MN496418.1	7192-8331	--	2,050x10^-21	G B M C S
19	KC256956.1	Unknown	7415-10024	KC256958.1	1-7414&10025-11016	8,315x10^-19	1,284x10^-16	R G B M C S
20	EF426852.1	HG939479.1	1-7924&9021-11016	Unknown	7925-9020	4,261x10^-16	8,038x10^-29	R G M C S T
21	FJ531814.1	Unknown	8263-10729	FJ531813.1	1-8262&10730-11016	1,310x10^-04	1,033x10^-05	R G B M C S T
22	GQ332371.1	JX513890.1	1-3579&7463-11016	GQ332370.1	3580-7462	5,350x10^-14	5,712x10^-18	R G B M C S T
23	EF426846.1	EF426843.1	10063-10880	Unknown	1-10062&10881-11016	4,498x10^-03	2,816x10^-15	R B M C S T
24	HG939479.1	KC162001.1	9012-10891	GQ332369.1	1-9011&10892-11016	1,129x10^-11	6,097x10^-10	R G B M C S T
25	GU972582.1	EF426852.1	1-10131&10953-11016	GU972581.1	10132-10952	--	1,937x10^-29	G M C S
26	KC256962.1	GQ332371.1	1-8608&8963-11016	KC256955.1	8609-8962	4,124x10^-05	1,604x10^-15	R G M C S
27	GU972571.1	AY017338.1	1-9284&10043-11016	X16907.1	9285-10042	4,168x10^-11	1,522x10^-13	R G B M C S
28	GU972562.1	GU972569	1-6029&6867-11016	Unknown	6030-6866	1,771x10^-06	3,314x10^-12	R M C S T
29	GQ332370.1	Unknown	1-3579&7793-11016	GQ332369.1	3580-7792	3,232x-10^09	1,202x10^-42	R G B M C S
30	EF426818.1	Unknown	1-7471&8187-11016	EF426803.1	7472-8186	--	1,909x10^-16	G M C S
31	GU972574.1	AY017338.1	1-9284&10043-11016	GU972580.1	9285-10042	1,165x10^-10	1,695x10^-21	R G M C S T
32	EU702445.1	Unknown	10081-10859	EU702440.1	1-10080&10860-11016	1,317x10^-02	2,370x10^-17	R G M C S
33	AY780903.1	AY780902.1	1-8253&9672-11016	Unknown	8254-9671	6,215x10^-17	3,594x10^-31	R G B M S T
34	DQ286903.1	Unknown	8921-9329	DQ286910.1	1-8920&9330-11016	5,245x10^-03	--	R B M C T
35	FJ831672.1	Unknown	1-8799&9229-11016	DQ286914.1	8800-9228	--	4,469x10^-14	G M C S T
36	KC256956.1	AY780901.1	1-7414&7784-11016	GU972584.1	7415-7783	--	3,497x10^-13	G M C S
37	FJ531813.1	Unknown	9339-10007	HG939482.1	1-9338&10008-11016	--	3,944x10^-02	M C S T
